# Supplementary material for: Anti-Inflammatory Effects of α-Galactosylceramide Analogs in Activated Microglia: Involvement of the p38 MAPK Signaling Pathway
Source: PubMed Central journal article supplement (PMC3921125; doi:10.1371/journal.pone.0087030), 2014-02-11

## < Supporting Information >

### **Anti-inflammatory effects of $\alpha$ -galactosylceramide derivatives in activated microglia; involvement of p38 MAPK signaling pathway**

**Yeon-Hui Jeong,<sup>1</sup> Yongju Kim,<sup>2</sup> Heebum Song,<sup>2</sup> Young Sun Chung<sup>3</sup>,  
Seung Bum Park<sup>2,4,\*</sup>, and Hee-Sun Kim<sup>1,\*</sup>**

*<sup>1</sup>Department of Molecular Medicine, Tissue Injury Defense Research Center, Ewha Womans University Medical School, Seoul, Republic of Korea*

*<sup>2</sup>Department of Chemistry, Seoul National University, Seoul, Republic of Korea*

*<sup>3</sup>Department of Counseling Psychology, Korea Soongsil Cyber University, Seoul 110-340, Republic of Korea*

*<sup>4</sup>Department of Biophysics and Chemical Biology/Bio-MAX Institute, Seoul National University, Seoul, Republic of Korea*

**\*Address correspondence and reprints requests to:** Hee-Sun Kim, Department of Molecular Medicine, Ewha Womans University, Mok-6-dong 911-1, Yangcheon-gu, Seoul 158-710, South Korea, Tel: 82-2-2650-5823, Email: [hskimp@ewha.ac.kr](mailto:hskimp@ewha.ac.kr)

Or

Seung Bum Park, Department of Chemistry, Seoul National University, 1 Gwanak-ro Gwanak-gu, Seoul 151-747, Korea. Tel: +82-2-880-9090, Email: [sbpark@snu.ac.kr](mailto:sbpark@snu.ac.kr)

|                                                |        |
|------------------------------------------------|--------|
| List of contents                               | page   |
| I. General experimental information            | S2     |
| II. Synthetic procedure and spectroscopic data | S3-S74 |

## I. General Experimental Information

All reactions were performed either in oven-dried glassware or microwave vessel under dry argon atmosphere. Toluene and tetrahydrofuran (THF) was dried by distillation from sodium-benzophenone immediately prior to use. Dichloromethane (DCM) was dried by distillation from CaH<sub>2</sub>. Other solvents and organic reagents were purchased from commercial vendors and used without further purification unless otherwise mentioned. All reagents used for cell culture were purchased from Gibco BRL (Grand Island, NY, USA). LPS was obtained from Sigma-Aldrich (St. Louis, MO, USA). All reagents and enzymes for RT-PCR were purchased from Promega (Madison, WI, USA). Antibodies against phospho-/total form of MAP kinases were purchased from Cell Signaling Technology (Beverly, MA, USA).

<sup>1</sup>H and <sup>13</sup>C NMR spectra were obtained on Varian Inova-500 (Varian Assoc., Palo Alto, USA) or Bruker DRX-300 (Bruker Biospin, Germany). Chemical shifts were reported in ppm relative to the residual solvent peak (CDCl<sub>3</sub>, <sup>1</sup>H: 7.24; <sup>13</sup>C: 77.23). Multiplicity was indicated as follows: s (singlet); d (doublet); t (triplet); q (quartet); quin (quintet); m (multiplet); dd (doublet of doublet); dt (doublet triplet); br s (broad singlet), etc. Coupling constants were reported in Hz. Routine mass analyses were performed on LC/MS system using electron spray ionization (ESI) or atmospheric pressure chemical ionization (APCI). The high resolution mass spectrometric analyses were conducted at the Mass Spectrometry Laboratory of Seoul National University using mass spectrometer by direct injection for fast atomic bombardment (FAB). The products were purified by flash column chromatography on silica gel (230–400 mesh). The eluent used for purification is reported in parentheses. Thin-layer chromatography (TLC) was performed on pre-coated glass-backed plates (silica gel 60 F<sub>254</sub> 0.25mm), and components were visualized by observation under UV light (254 and 365 nm) or by treating the plates with anisaldehyde, KMnO<sub>4</sub>, phosphomolybdic acid, and vanillin followed by heating. Distilled water was polished by ion exchange and filtration.

## II. Synthetic Procedures and Spectroscopic Data

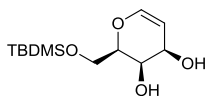

**Compound 6.** D-Galactal (1.0 g, 6.84 mmol), *tert*-butyldimethylsilyl chloride (1.13 g, 7.52 mmol) and imidazole (930 mg, 13.68 mmol) were stirred in anhydrous dimethylformamide (DMF, 10 mL) at room temperature for 12 h. After the completion of reaction monitored by TLC, DMF was evaporated under reduced pressure and the resulting mixture was diluted with ethyl acetate (EtOAc) and washed with saturated NaHCO<sub>3</sub>(aq) and brine. The combined organic layer was dried over anhydrous Na<sub>2</sub>SO<sub>4</sub>(s). The filtrate was condensed under reduced pressure and purified by silica-gel flash column chromatography (EtOAc:Hex = 1:1, v/v) to provide desired product **6** (1.35 g, 76%) as an amorphous white solid;  $[\alpha]_{\text{D}}^{25} +4.8$  (c = 2.55, CHCl<sub>3</sub>); <sup>1</sup>H NMR (500 MHz, CDCl<sub>3</sub>)  $\delta$  6.39 (dd, *J* = 6.3, 1.3 Hz, 1H), 4.73 (dt, *J* = 6.3, 2.0 Hz, 1H), 4.33–4.30 (m, 1H), 4.13–4.10 (m, 1H), 4.00–3.88 (m, 3H), 3.20 (d, *J* = 5.0 Hz, 1H), 2.73 (d, *J* = 10.5 Hz, 1H), 0.91 (s, 9H), 0.11 (s, 6H); LRMS (ESI<sup>+</sup>) *m/z* calcd for C<sub>12</sub>H<sub>24</sub>NaO<sub>4</sub>Si [M + Na]<sup>+</sup>: 283.13; Found: 283.23.

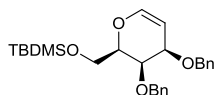

**Compound 7.** To a solution of compound **6** (1.21 g, 4.647 mmol) in anhydrous THF (25 mL) stirred at 0 °C, was added sodium hydride (690 mg in 60% mineral oil, 17.19 mmol) over a 15 min period. The reaction mixture was stirred for 30 min and warm up to room temperature. Then, benzyl bromide (1.77 mL, 14.87 mmol) and tetra-*n*-butylammonium iodide (TBAI, 170 mg, 0.4647 mmol) were added carefully in dropwise. The mixture was stirred at room temperature for overnight under nitrogen atmosphere. After the completion of reaction monitored by TLC, the resultant was diluted with EtOAc and washed twice with brine. The combined organic layer was dried over anhydrous Na<sub>2</sub>SO<sub>4</sub>(s). The filtrate was condensed under reduced pressure and purified by silica-gel flash column chromatography (EtOAc:Hex = 1:3, v/v) to provide the desired product **7** (1.60 g, 78%) as an amorphous white solid;  $[\alpha]_{\text{D}}^{25} -40.9$  (c = 2.23, CHCl<sub>3</sub>); <sup>1</sup>H NMR (500 MHz, CDCl<sub>3</sub>)  $\delta$  7.38–7.25 (m, 10H), 6.35 (dd, *J* = 6.5, 1.5 Hz, 1H), 4.91 (dd, *J* = 11.5 Hz, 1H), 4.85 (dq, *J* = 3.0, 1.3 Hz, 1H), 4.70–4.60 (m, 3H), 4.22–4.20 (m, 1H), 4.02–3.97 (m, 2H), 3.90–3.79 (m, 2H), 0.89 (s, 9H), 0.05 (s, 6H); LRMS (ESI<sup>+</sup>) *m/z* calcd for C<sub>26</sub>H<sub>37</sub>O<sub>4</sub>Si [M + H]<sup>+</sup>: 441.25; Found: 441.30.

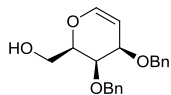

**Compound 8.** To a solution of compound **7** (800 mg, 1.815 mmol) in anhydrous tetrahydrofuran (THF, 15 mL) was added tetra-*n*-butylammonium fluoride (2.72 mL in 1.0 M THF solution, 2.72 mmol) over a 10 min period. The mixture was stirred at room temperature for 2 h under nitrogen atmosphere. After the completion of reaction monitored by TLC, the resultant was diluted with EtOAc and washed twice with brine. The combined organic layer was dried over anhydrous Na<sub>2</sub>SO<sub>4</sub>(s). The filtrate was condensed under reduced pressure and purified by silica-gel flash column chromatography (EtOAc:Hex = 1:2, v/v) to provide the desired products **8** (527 mg, 89%) as a colorless oil; [ $\alpha$ ]<sub>D</sub><sup>25</sup> -101.9 (c = 2.15, CHCl<sub>3</sub>); <sup>1</sup>H NMR (500 MHz, CDCl<sub>3</sub>)  $\delta$  7.37–7.24 (m, 10H), 6.40 (d, *J* = 6.0 Hz, 1H), 4.86–4.82 (m, 2H), 4.72–4.62 (m, 3H), 4.18–4.16 (m, 1H), 4.11–4.09 (m, 1H), 3.99–3.95 (m, 2H), 3.75–3.72 (m, 1H), 2.54 (br s, 1H); LRMS (ESI<sup>+</sup>) *m/z* calcd for C<sub>20</sub>H<sub>22</sub>O<sub>4</sub> [M + H]<sup>+</sup>: 326.15; Found: 326.09.

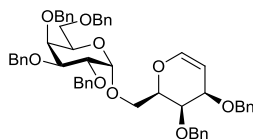

**Compound 9.** To a solution of 1-*O*-acetyl-2,3,4,6-tetra-*O*-benzyl-D-galactopyranoside (2.95 g, 5.055 mmol) in DCM (30 mL) at 0 °C was added trimethylsilyl iodide (TMSI, 719  $\mu$ L, 5.055 mmol) and stirred for at 0 °C for 30 min. The reaction was stopped by adding 30 mL of anhydrous toluene and the residual TMSI was removed by azeotrope-evaporation with anhydrous toluene in three times. The slightly yellow residue was dissolved in anhydrous benzene (10 mL) and kept under argon atmosphere. In a separate round-bottom flask, molecular sieves (MS, 4 Å, 1 g), TBAI (5.6 g, 15.2 mmol), compound **8** (550 mg, 1.685 mmol), and diisopropylethylamine (880  $\mu$ L, 5.055 mmol) were added into anhydrous benzene (10 mL). The reaction mixture was stirred under argon at 65 °C for 10 min. Upon the complete dissolution of TBAI, the glycosyl iodide in anhydrous benzene was added into this flask and the reaction mixture was stirred at 65 °C for 2 h. The reaction was stopped by adding EtOAc (100 mL) and cooled to 0 °C. The white precipitate and MS were removed by filtration through Celite<sup>®</sup>-packed glass filter with EtOAc-washing. The filtrate was washed with sat. Na<sub>2</sub>S<sub>2</sub>O<sub>3</sub>(aq) (2  $\times$  100 mL) and brine, dried over anhydrous Na<sub>2</sub>SO<sub>4</sub>. The filtrate was condensed under reduced pressure and purified by silica-gel flash column chromatography (EtOAc:Hex = 1:5,

v/v) to provide the desired product **9** (1.26 g, 88%) as a colorless oil;  $[\alpha]_D^{19} +8.6$  ( $c = 2.25$ ,  $\text{CHCl}_3$ );  $^1\text{H NMR}$  (500 MHz,  $\text{CDCl}_3$ )  $\delta$  7.39–7.22 (m, 30H), 6.24 (dd,  $J = 6.3, 1.2$  Hz, 1H), 4.93 (d,  $J = 11.5$  Hz, 1H), 4.83–4.66 (m, 5H), 4.65–4.54 (m, 5H), 4.44–4.37 (m, 2H), 4.28–4.26 (m, 1H), 4.14–4.11 (m, 1H), 4.04–3.95 (m, 5H), 3.91–3.90 (m, 1H), 3.71 (dd,  $J = 10.7, 4.7$  Hz, 1H), 3.56–3.46 (m, 2H);  $^{13}\text{C NMR}$  (75 MHz,  $\text{CDCl}_3$ )  $\delta$  144.3, 139.1, 138.9, 138.8, 138.8, 138.5, 138.2, 128.7, 128.7, 128.6, 128.5, 128.5, 128.4, 128.1, 128.1, 128.0, 127.9, 127.8, 127.8, 127.7, 127.6, 127.6, 99.9, 98.0, 79.3, 76.6, 75.2, 75.2, 75.0, 73.6, 73.2, 72.0, 71.0, 69.4, 69.0, 66.5, 53.6; LRMS ( $\text{ESI}^+$ )  $m/z$  calcd for  $\text{C}_{54}\text{H}_{57}\text{O}_9$   $[\text{M} + \text{H}]^+$ : 849.40; Found: 849.51.

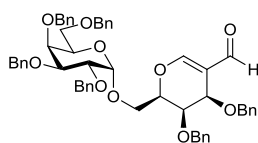

**Compound 10.** To a solution of compound **9** (1.2 g, 1.413 mmol) in DMF (14 mL) stirred at 0 °C, was added  $\text{POCl}_3$  (263  $\mu\text{L}$ , 2.827 mmol) over a 30-min period. The reaction mixture was stirred for 1 h and warm up to room temperature. After 18 h, the resultant was diluted with EtOAc and washed with saturated  $\text{NaHCO}_3(\text{aq})$  and brine. Then, the combined organic layer was dried over anhydrous  $\text{Na}_2\text{SO}_4(\text{s})$ . The filtrate was condensed under reduced pressure and purified by silica-gel flash column chromatography (EtOAc:Hex = 1:3, v/v) to provide the desired products **10** (556 mg, 45%) as a colorless oil;  $[\alpha]_D^{25} +38.9$  ( $c = 0.81$ ,  $\text{CHCl}_3$ );  $^1\text{H NMR}$  (500 MHz,  $\text{CDCl}_3$ )  $\delta$  8.96 (s, 1H), 7.41–7.22 (m, 30H), 6.94 (s, 1H), 4.96 (d,  $J = 11.5$  Hz, 1H), 4.86 (d,  $J = 11.5$  Hz, 1H), 4.83 (d,  $J = 12.0$  Hz, 1H), 4.77–4.50 (m, 10H), 4.38–4.32 (m, 2H), 4.09–3.97 (m, 6H), 3.74 (dd,  $J = 5.2, 3.8$  Hz, 1H), 3.47–3.42 (m, 2H); LRMS ( $\text{ESI}^+$ )  $m/z$  calcd for  $\text{C}_{55}\text{H}_{57}\text{O}_{10}$   $[\text{M} + \text{H}]^+$ : 877.40; Found: 877.59.

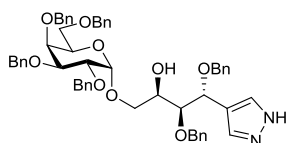

**Compound 11.** Compound **10** (552 mg, 0.629 mmol) and hydrazine monohydrate (61  $\mu\text{L}$ , 1.259 mmol) were dissolved in MeOH (6 mL), and the mixture was stirred at room temperature for 2 h. After completion of reaction as indicated by TLC, the resulting mixture was condensed under reduced pressure without more purification to provide the desired product **11** (560 mg, quantitative yield) as a colorless oil;  $[\alpha]_D^{19} +9.5$  ( $c = 1.66$ ,  $\text{CHCl}_3$ );  $^1\text{H NMR}$  (500 MHz,  $\text{CDCl}_3$ )

$\delta$  7.52 (s, 2H), 7.51–7.10 (m, 30H), 4.92 (d,  $J = 11.5$  Hz, 1H), 4.83 (d,  $J = 4.0$  Hz, 1H), 4.79 (d,  $J = 12.0$  Hz, 1H), 4.75 (d,  $J = 12.0$  Hz, 1H), 4.69 (d,  $J = 12.0$  Hz, 1H), 4.66–4.64 (m, 2H), 4.55 (d,  $J = 11.0$  Hz, 1H), 4.46–4.43 (m, 2H), 4.37–4.35 (m, 2H), 4.31–4.27 (m, 2H), 4.10–4.03 (m, 2H), 3.99 (m, 1H), 3.93–3.91 (m, 2H), 3.72 (dd,  $J = 10.5, 6.5$  Hz, 1H), 3.66 (dd,  $J = 6.5, 3.0$  Hz, 1H), 3.53–3.48 (m, 3H); LRMS (ESI<sup>+</sup>)  $m/z$  calcd for C<sub>55</sub>H<sub>59</sub>N<sub>2</sub>O<sub>9</sub> [M + H]<sup>+</sup>: 891.42; Found: 891.45.

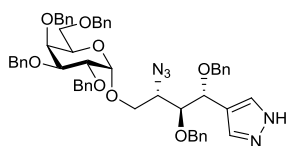

**Compound 13.** To a solution of compound **11** (560 mg, 0.628 mmol) and DIPEA (547  $\mu$ L, 3.142 mmol) in dry DCM (5 mL) stirred at 0 °C, was added MsCl (146  $\mu$ L, 1.884 mmol) in dropwise. The reaction mixture was stirred for 3 h and the resultant was diluted with EtOAc and washed with saturated NaHCO<sub>3</sub>(aq) and brine. Then, the combined organic layer was dried over anhydrous Na<sub>2</sub>SO<sub>4</sub>(s). The filtrate was condensed under reduced pressure to provide the desired crude product **12**. Crude compound **12** and NaN<sub>3</sub> (817 mg, 12.56 mmol) were dissolved in DMF (3 mL) and stirred at 120 °C for 2.5 days. After completion of reaction as indicated by TLC, the resulting mixture was diluted with EtOAc and washed with brine. The combined organic layer was dried over anhydrous Na<sub>2</sub>SO<sub>4</sub>(s). The filtrate was condensed under reduced pressure and purified by silica-gel flash column chromatography (EtOAc:Hex = 1:1, v/v) to provide the desired product **13** (328 mg, 57%) as a colorless oil;  $[\alpha]_D^{25} +7.4$  ( $c = 1.60$ , CHCl<sub>3</sub>); <sup>1</sup>H NMR (500 MHz, CDCl<sub>3</sub>)  $\delta$  7.56 (s, 2H), 7.38–7.10 (m, 30H), 4.93 (d,  $J = 11.0$  Hz, 1H), 4.86 (d,  $J = 3.5$  Hz, 1H), 4.83–4.78 (m, 2H), 4.73 (d,  $J = 11.5$  Hz, 1H), 4.68–4.55 (m, 5H), 4.46 (d,  $J = 11.5$  Hz, 1H), 4.42 (d,  $J = 12.0$  Hz, 1H), 4.35 (d,  $J = 11.5$  Hz, 1H), 4.31 (d,  $J = 11.5$  Hz, 1H), 4.05 (dd,  $J = 10.0, 3.0$  Hz, 1H), 3.98 (dd,  $J = 10.0, 2.5$  Hz, 1H), 3.94–3.90 (m, 4H), 3.69 (dd,  $J = 10.5, 7.0$  Hz, 1H), 3.48–3.42 (m, 3H); LRMS (ESI<sup>+</sup>)  $m/z$  calcd for C<sub>55</sub>H<sub>58</sub>N<sub>5</sub>O<sub>8</sub> [M + H]<sup>+</sup>: 916.43; Found: 916.38.

#### General Procedure for the *N*-alkylation of pyrazole 14

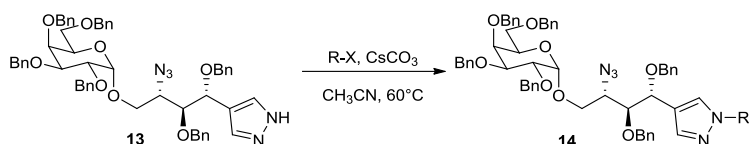

Compound **13**, alkylating agent (1.5 equiv.) and CsCO<sub>3</sub> (3 equiv.) were stirred in CH<sub>3</sub>CN (0.05 M concentration) at 60°C for 10 h. After the completion of reaction monitored by TLC, CH<sub>3</sub>CN was evaporated under reduced pressure and the resulting mixture was diluted with EtOAc and washed with brine. The combined organic layer was dried over anhydrous Na<sub>2</sub>SO<sub>4</sub>(s). The filtrate was condensed under reduced pressure and purified by silica-gel flash column chromatography (EtOAc:Hex = 1:3, v/v) to provide desired product **14** (>90% yield) as a colorless oil.

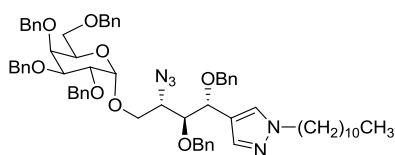

Compound **14a**; 92% yield; <sup>1</sup>H NMR (500 MHz, CDCl<sub>3</sub>) δ 7.50 (s, 1H), 7.38–7.20 (m, 29H), 7.17–7.15 (m, 2H), 4.93 (d, *J* = 11.0 Hz, 1H), 4.87 (d, *J* = 3.5 Hz, 1H), 4.83–4.77 (m, 2H), 4.75–4.73 (m, 1H), 4.67 (d, *J* = 12.0 Hz, 1H), 4.61–4.54 (m, 4H), 4.48–4.43 (m, 2H), 4.36 (d, *J* = 12.0 Hz, 1H), 4.30 (d, *J* = 12.0 Hz, 1H), 4.08–4.06 (m, 3H), 3.98 (dd, *J* = 10.3 Hz, 2.5 Hz, 1H), 3.95–3.90 (m, 4H), 3.70 (dd, *J* = 11.0, 7.0 Hz, 1H), 3.51–3.45 (m, 3H), 1.82 (quin, *J* = 7.0 Hz, 2H), 1.30–1.24 (m, 18H), 0.87 (t, *J* = 7.0 Hz, 3H); <sup>13</sup>C NMR (75 MHz, CDCl<sub>3</sub>) 139.5, 139.0, 138.9, 138.9, 138.5, 138.4, 138.2, 129.2, 128.6, 128.5, 128.5, 128.4, 128.4, 128.4, 128.4, 128.4, 128.1, 128.0, 127.9, 127.8, 127.7, 127.7, 127.7, 127.6, 127.5, 117.8, 98.8, 80.8, 79.1, 76.5, 75.3, 75.0, 74.9, 74.6, 73.6, 73.4, 73.3, 73.0, 70.5, 69.9, 69.2, 67.9, 62.3, 52.5, 32.1, 30.5, 29.8, 29.8, 29.7, 29.5, 29.3, 26.9, 22.9, 14.3.

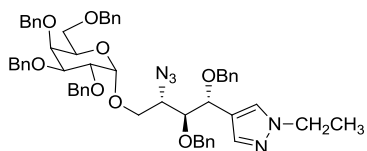

Compound **14b**; 91% yield; [α]<sub>D</sub><sup>25</sup> +10.7 (c = 0.25, CHCl<sub>3</sub>); <sup>1</sup>H NMR (500 MHz, CDCl<sub>3</sub>) δ 7.51 (s, 1H), 7.38–7.35 (m, 2H), 7.33–7.21 (m, 27H), 7.17–7.15 (m, 2H), 4.93 (d, *J* = 11.5 Hz, 1H), 4.87 (d, *J* = 3.0 Hz, 1H), 4.83–4.78 (m, 2H), 4.73 (d, *J* = 12.0 Hz, 1H), 4.68 (d, *J* = 12.0 Hz, 1H), 4.62 (d, *J* = 1.5 Hz, 2H), 4.59 (d, *J* = 5.0 Hz, 1H), 4.56 (d, *J* = 11.0 Hz, 1H), 4.89–4.42 (m, 2H), 4.37–4.30 (m, 2H), 4.11 (q, *J* = 7.3 Hz, 2H), 4.05 (dd, *J* = 10.0, 4.0 Hz, 1H),

3.98 (dd,  $J = 10.0, 3.0$  Hz, 1H), 3.94–3.91 (m, 4H), 3.69 (dd,  $J = 10.8, 6.8$  Hz, 1H), 3.50–3.46 (m, 3H), 1.45 (t,  $J = 7.5$  Hz, 3H);  $^{13}\text{C}$  NMR (75 MHz,  $\text{CDCl}_3$ )  $\delta$  139.5, 139.0, 138.9, 138.8, 138.5, 138.7, 138.2, 128.6, 128.6, 128.5, 128.5, 128.5, 128.4, 128.4, 128.4, 128.4, 128.1, 128.0, 127.9, 127.9, 127.8, 127.8, 127.7, 127.6, 117.9, 98.8, 80.7, 79.1, 76.5, 75.2, 74.9, 74.9, 74.7, 73.6, 73.4, 73.3, 70.5, 69.9, 69.2, 68.0, 62.2, 60.6, 47.2, 15.6.

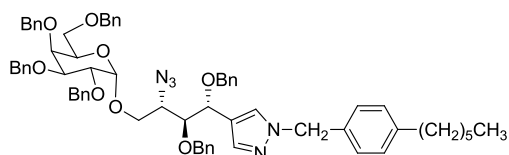

Compound **14c**; 93% yield;  $^1\text{H}$  NMR (500 MHz,  $\text{CDCl}_3$ )  $\delta$  7.54 (s, 1H), 7.38–7.36 (m, 2H), 7.33–7.21 (m, 29H), 7.13–7.09 (m, 4H), 4.93 (d,  $J = 11.5$  Hz, 1H), 4.86 (d,  $J = 3.5$  Hz, 1H), 4.83–4.66 (m, 4H), 4.58–4.52 (m, 5H), 4.45–4.42 (m, 3H), 4.34 (d,  $J = 11.5$  Hz, 1H), 4.27 (d,  $J = 11.5$  Hz, 1H), 4.04 (dd,  $J = 3.5, 10.0$  Hz, 1H), 3.97 (dd,  $J = 10.0, 2.5$  Hz, 1H), 3.93–3.87 (m, 4H), 3.69 (dd,  $J = 10.8, 6.5$  Hz, 1H), 3.54–3.52 (m, 1H), 3.47 (d,  $J = 6.0$  Hz, 2H), 2.57 (t,  $J = 8.0$  Hz, 2H), 1.57 (quin,  $J = 7.5$  Hz, 2H), 1.34–1.27 (m, 6H), 0.87 (t,  $J = 6.8$  Hz, 3H);  $^{13}\text{C}$  NMR (75 MHz,  $\text{CDCl}_3$ )  $\delta$  143.1, 139.8, 139.0, 138.9, 138.9, 138.4, 138.3, 138.2, 129.6, 129.1, 128.6, 128.5, 128.4, 128.0, 128.0, 127.9, 127.9, 127.7, 127.7, 127.6, 118.7, 98.8, 80.8, 79.1, 76.5, 75.2, 74.9, 74.8, 74.4, 73.6, 73.4, 73.2, 70.5, 69.9, 69.2, 67.9, 62.3, 56.1, 35.8, 31.9, 31.6, 29.9, 29.2, 22.8, 14.3; LRMS (ESI<sup>+</sup>)  $m/z$  calcd for  $\text{C}_{68}\text{H}_{75}\text{N}_5\text{O}_8$  [ $\text{M} + \text{H}$ ]<sup>+</sup>: 1090.56; Found: 1090.57.

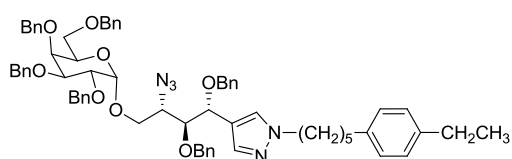

Compound **14d**; 92% yield;  $[\alpha]_{\text{D}}^{25} +8.7$  ( $c = 0.70$ ,  $\text{CHCl}_3$ );  $^1\text{H}$  NMR (500 MHz,  $\text{CDCl}_3$ )  $\delta$  7.50 (s, 1H), 7.38–7.21 (m, 29H), 7.17–7.15 (m, 2H), 7.09 (d,  $J = 8.0$  Hz, 2H), 7.05 (d,  $J = 8.0$  Hz, 2H), 4.93 (d,  $J = 11.5$  Hz, 1H), 4.87 (d,  $J = 3.5$  Hz, 1H), 4.83–4.78 (m, 2H), 4.72 (d,  $J = 11.5$  Hz, 1H), 4.67 (d,  $J = 12.0$  Hz, 1H), 4.61 (s, 2H), 4.58–4.54 (m, 2H), 4.47–4.42 (m, 2H), 4.35 (d,  $J = 12.0$  Hz, 1H), 4.29 (d,  $J = 11.5$  Hz, 1H), 4.06–4.02 (m, 3H), 3.97 (dd,  $J = 10.0, 2.5$  Hz, 1H), 3.94–3.90 (m, 4H), 3.69 (dd,  $J = 10.0, 6.5$  Hz, 1H), 3.49–3.46 (m, 3H), 2.60 (q,  $J = 7.7$  Hz, 2H), 2.53 (t,  $J = 7.8$  Hz, 2H), 1.85 (quin,  $J = 7.4$  Hz, 2H), 1.61 (quin,  $J = 7.6$  Hz, 2H), 1.31 (quin,  $J = 7.6$  Hz, 2H), 1.21 (t,  $J = 7.5$  Hz, 3H);  $^{13}\text{C}$  NMR (75 MHz,  $\text{CDCl}_3$ )  $\delta$  141.8, 139.6, 139.6, 139.0, 138.9, 138.5, 138.4, 138.2, 129.3, 128.6, 128.5, 128.5, 128.4, 128.4, 128.1,



128.0, 127.9, 127.9, 127.8, 127.7, 127.6, 117.8, 98.8, 80.7, 79.1, 77.4, 76.5, 75.3, 75.0, 74.9, 74.6, 73.7, 73.4, 73.3, 70.5, 69.9, 69.2, 68.0, 62.3, 52.4, 35.5, 31.2, 30.4, 28.6, 26.5, 15.8; LRMS (ESI<sup>+</sup>) *m/z* calcd for C<sub>68</sub>H<sub>76</sub>N<sub>5</sub>O<sub>8</sub> [M + H]<sup>+</sup>: 1090.57; Found: 1090.59.

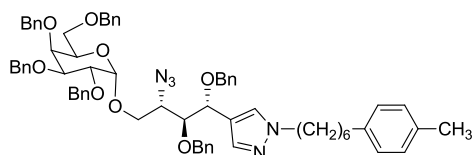

Compound **14e**; 91% yield; <sup>1</sup>H NMR (500 MHz, CDCl<sub>3</sub>) δ 7.50 (s, 1H), 7.38–7.15 (m, 31H), 7.06 (d, *J* = 8.0 Hz, 2H), 7.02 (d, *J* = 8.0 Hz, 2H), 4.93 (d, *J* = 11.5 Hz, 1H), 4.86 (d, *J* = 3.0 Hz, 1H), 4.82 (d, *J* = 11.5 Hz, 1H), 4.78 (d, *J* = 12.0 Hz, 1H), 4.72 (d, *J* = 12.0 Hz, 1H), 4.67 (d, *J* = 12.0 Hz, 1H), 4.61–4.54 (m, 3H), 4.47–4.42 (m, 2H), 4.35 (d, *J* = 12.0 Hz, 1H), 4.30 (d, *J* = 12.0 Hz, 1H), 4.06–4.02 (m, 2H), 3.97 (dd, *J* = 10.0, 2.5 Hz, 1H), 3.94–3.90 (m, 3H), 3.69 (dd, *J* = 10.5, 7.0 Hz, 1H), 3.51–3.45 (m, 2H), 2.52 (t, *J* = 7.8 Hz, 2H), 2.30 (s, 3H), 1.81 (quin, *J* = 7.3 Hz, 2H), 1.56 (quin, *J* = 7.5 Hz, 2H), 1.36–1.24 (m, 4H); <sup>13</sup>C NMR (125 MHz, CDCl<sub>3</sub>) δ 139.6, 138.9, 138.9, 138.5, 138.4, 138.2, 129.1, 128.6, 128.5, 128.4, 128.1, 128.0, 128.0, 127.9, 127.8, 127.7, 127.6, 117.9, 98.8, 80.7, 79.1, 77.4, 76.8, 76.5, 75.2, 75.0, 74.9, 74.6, 73.6, 73.4, 73.3, 70.5, 70.0, 69.2, 68.0, 62.2, 52.5, 35.5, 31.6, 30.5, 28.9, 26.7, 21.2; LRMS (ESI<sup>+</sup>) *m/z* calcd for C<sub>68</sub>H<sub>76</sub>N<sub>5</sub>O<sub>8</sub> [M + H]<sup>+</sup>: 1090.57; Found: 1090.77.

### General Procedure for the *N*-acylation at sphingosine backbone for the preparation of **15-18**

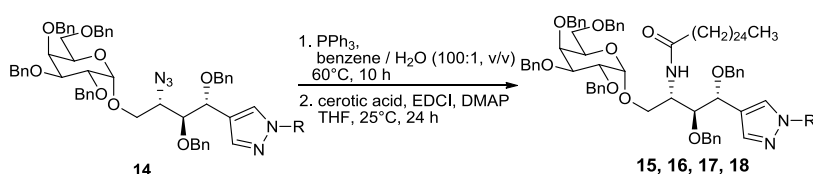

Compound **14** and PPh<sub>3</sub> (2 equiv.) were dissolved in benzene/H<sub>2</sub>O co-solvent (100/1, 10 mM concentration). Then, the mixture was stirred at 60 °C for 10 h. After completion of reaction monitored by TLC, the reaction mixture was condensed under reduced pressure and re-dissolved in anhydrous THF (10 mM concentration). Carboxylic acid (1.5 equiv.), EDCI (3 equiv.), and DMAP (catalytic amount) were added to the corresponding mixture and stirred at room temperature for 24 h. After reaction completion, the resulting mixture was diluted with EtOAc and washed with brine. The combined organic layer was dried over anhydrous Na<sub>2</sub>SO<sub>4</sub>(s). The filtrate was condensed under reduced pressure and purified by silica-gel flash

column chromatography (EtOAc:Hex = 1:3, v/v) to provide the desired product **15–18** as a colorless oil.

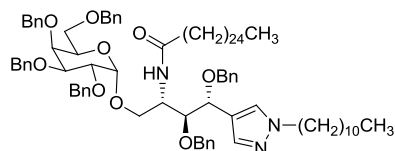

Compound **15a**; 55% yield;  $[\alpha]_{\text{D}}^{25}$   $-2.68$  ( $c = 0.90$ ,  $\text{CHCl}_3$ );  $^1\text{H NMR}$  (500 MHz,  $\text{CDCl}_3$ )  $\delta$  7.53 (s, 1H), 7.41 (s, 1H), 7.37–7.35 (m, 2H), 7.33–7.21 (m, 28H), 6.16 (d,  $J = 9.5$  Hz, 1H), 4.91 (m, 3H), 4.72 (q,  $J = 6.0$  Hz, 2H), 4.63 (d,  $J = 11.5$  Hz, 1H), 4.55 (d,  $J = 11.0$  Hz, 2H), 4.49–4.45 (m, 3H), 4.36 (d,  $J = 12.0$  Hz, 1H), 4.22 (d,  $J = 12.0$  Hz, 1H), 4.10–4.06 (m, 1H), 4.05–4.01 (m, 3H), 3.95–3.91 (m, 2H), 3.89–3.86 (m, 3H), 3.55 (dd,  $J = 10.5, 3.5$  Hz, 1H), 3.48 (dd,  $J = 9.3, 6.8$  Hz, 1H), 3.35 (dd,  $J = 9.3, 6.3$  Hz, 1H), 1.98–1.86 (m, 2H), 1.81 (quin,  $J = 7.0$  Hz, 2H), 1.53–1.44 (m, 2H), 1.31–1.15 (m, 60H), 0.91–0.86 (m, 6H);  $^{13}\text{C NMR}$  (75 MHz,  $\text{CDCl}_3$ )  $\delta$  173.0, 139.7, 138.8, 138.7, 138.6, 137.9, 129.1, 128.6, 128.6, 128.6, 128.5, 128.5, 128.5, 128.2, 128.1, 128.0, 127.9, 127.8, 127.7, 117.5, 99.7, 80.9, 79.0, 75.2, 74.9, 74.5, 73.7, 73.6, 73.1, 70.3, 70.1, 69.6, 69.4, 52.5, 50.2, 36.9, 32.1, 30.6, 29.9, 29.9, 29.8, 29.8, 29.7, 29.6, 29.6, 29.6, 29.5, 29.4, 26.9, 25.9, 24.7, 22.9, 14.3

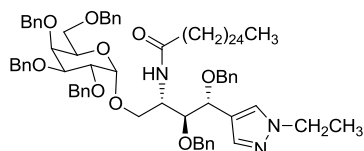

Compound **15b**; 80% yield;  $[\alpha]_{\text{D}}^{25}$   $-4.21$  ( $c = 0.38$ ,  $\text{CHCl}_3$ );  $^1\text{H NMR}$  (500 MHz,  $\text{CDCl}_3$ )  $\delta$  7.54 (s, 1H), 7.44 (s, 1H), 7.37–7.21 (m, 30H), 4.91 (d,  $J = 11.5$  Hz, 1H), 4.807–4.71 (m, 5H), 4.64–4.55 (m, 3H), 4.50–4.45 (m, 3H), 4.35 (d,  $J = 11.5$  Hz, 1H), 4.23 (d,  $J = 12.0$  Hz, 1H), 4.11 (q,  $J = 7.8$  Hz, 2H), 4.08–4.01 (m, 2H), 3.99–3.92 (m, 2H), 3.90–3.86 (m, 3H), 3.53 (dd,  $J = 11.0, 3.5$  Hz, 1H), 3.49 (dd,  $J = 9.5, 6.5$  Hz, 1H), 3.34 (dd,  $J = 9.5, 6.0$  Hz, 1H), 1.96–1.86 (m, 2H), 1.48 (quin,  $J = 7.0$  Hz, 3H), 1.34–1.23 (m, 44H), 0.88 (t,  $J = 7.0$  Hz, 3H);  $^{13}\text{C NMR}$  (75 MHz,  $\text{CDCl}_3$ )  $\delta$  172.9, 139.7, 138.8, 138.6, 138.6, 137.8, 129.1, 128.6, 128.6, 128.5, 128.4, 128.2, 128.1, 128.1, 128.0, 127.9, 127.8, 127.6, 127.6, 117.6, 99.8, 80.8, 79.0, 75.3, 74.9, 74.9, 74.5, 73.7, 73.7, 73.1, 70.3, 70.2, 69.7, 69.4, 50.2, 47.1, 36.9, 32.1, 29.9, 29.9, 29.8, 29.7, 29.6, 29.6, 25.9, 22.9, 15.7, 14.3.

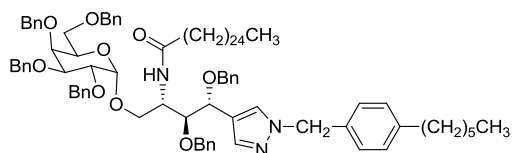

Compound **15c**; 78% yield;  $[\alpha]_{\text{D}}^{25}$  -4.21 ( $c = 0.38$ ,  $\text{CHCl}_3$ );  $^1\text{H NMR}$  (500 MHz,  $\text{CDCl}_3$ )  $\delta$  7.58 (s, 1H), 7.43 (s, 1H), 7.36–7.18 (m, 30H), 1.12–7.08 (m, 4H), 6.07 (d,  $J = 9.0$  Hz, 1H), 5.21 (d,  $J = 3.0$  Hz, 2H), 4.91 (d,  $J = 11.5$  Hz, 1H), 4.80–4.76 (m, 3H), 4.72–4.61 (m, 3H), 4.57–4.50 (m, 2H), 4.46–4.44 (m, 3H), 4.35 (d,  $J = 12.0$  Hz, 1H), 4.20 (d,  $J = 12.0$  Hz, 1H), 4.13–4.08 (m, 1H), 4.02 (dd,  $J = 10.0, 3.5$  Hz, 1H), 3.94–3.85 (m, 5H), 3.55 (dd,  $J = 11.0, 3.5$  Hz, 1H), 3.48 (dd,  $J = 9.0, 6.5$  Hz, 1H), 3.35 (dd,  $J = 9.3, 6.3$  Hz, 1H), 2.55 (t,  $J = 7.8$  Hz), 1.95–1.83 (m, 2H), 1.56 (quin,  $J = 7.5$  Hz, 2H), 1.46 (quin,  $J = 7.3$  Hz, 2H), 1.33–1.23 (m, 50H), 0.89–0.85 (m, 6H);  $^{13}\text{C NMR}$  (75 MHz,  $\text{CDCl}_3$ )  $\delta$  172.9, 142.9, 140.7, 138.8, 138.7, 138.6, 137.9, 134.1, 130.1, 129.0, 128.6, 128.6, 128.5, 128.5, 128.4, 128.2, 128.1, 128.0, 128.0, 127.9, 127.8, 127.6, 118.4, 99.7, 81.0, 79.0, 75.0, 75.0, 74.9, 74.5, 73.7, 73.6, 73.1, 70.3, 70.2, 69.4, 56.0, 50.3, 36.9, 35.8, 32.1, 31.9, 31.6, 29.9, 29.9, 29.8, 29.7, 29.6, 29.2, 25.9, 22.9, 22.8, 14.3, 14.3.

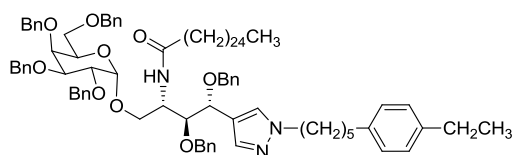

Compound **15d**; 65% yield;  $[\alpha]_{\text{D}}^{25}$  -1.9 ( $c = 1.10$ ,  $\text{CHCl}_3$ );  $^1\text{H NMR}$  (500 MHz,  $\text{CDCl}_3$ )  $\delta$  7.54 (s, 1H), 7.41 (s, 1H), 7.37–7.23 (m, 30H), 7.09 (d,  $J = 7.5$  Hz, 2H), 7.05 (d,  $J = 7.5$  Hz, 2H), 6.16 (d,  $J = 9.0$  Hz, 1H), 4.91 (d,  $J = 11.5$  Hz, 1H), 4.80–4.71 (m, 5H), 4.63 (d,  $J = 12.0$  Hz, 1H), 4.58–4.55 (m, 2H), 4.49–4.45 (m, 3H), 4.35 (d,  $J = 12.0$  Hz, 1H), 4.22 (d,  $J = 12.0$  Hz, 1H), 4.09–3.87 (m, 9H), 3.54 (dd,  $J = 11.0, 3.0$  Hz, 1H), 3.48 (dd,  $J = 9.0, 6.5$  Hz, 1H), 3.35 (dd,  $J = 9.3, 5.8$  Hz, 1H), 2.60 (q,  $J = 7.5$  Hz, 2H), 2.53 (t,  $J = 7.8$  Hz, 2H), 1.96–1.82 (m, 4H), 1.65–1.57 (m, 4H), 1.48 (quin,  $J = 7.0$  Hz, 2H), 1.28–1.24 (m, 49H), 0.88 (t,  $J = 6.8$  Hz, 3H); LRMS( $\text{ESI}^+$ )  $m/z$  calcd for  $\text{C}_{94}\text{H}_{128}\text{N}_3\text{O}_9$   $[\text{M}+\text{H}]^+$ : 1442.97; Found: 1442.93.

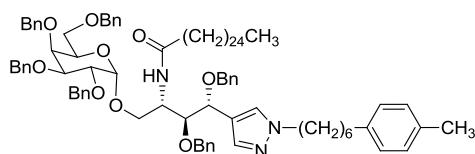

Compound **15e**; 75% yield;  $[\alpha]_{\text{D}}^{25} -16.1$  ( $c = 1.5$ ,  $\text{CHCl}_3$ );  $^1\text{H NMR}$  (500 MHz,  $\text{CDCl}_3$ )  $\delta$  7.54 (s, 1H), 7.41 (s, 1H), 7.37–7.21 (m, 30H), 7.06 (d,  $J = 8.0$  Hz, 2H), 7.03 (d,  $J = 8.0$  Hz, 2H), 6.17 (d,  $J = 9.0$  Hz, 1H), 4.91 (d,  $J = 11.5$  Hz, 1H), 4.80–4.71 (m, 5H), 4.62 (d,  $J = 12.0$  Hz, 1H), 4.57–4.55 (m, 2H), 4.48–4.45 (m, 3H), 4.35 (d,  $J = 12.0$  Hz, 1H), 4.22 (d,  $J = 12.0$  Hz, 1H), 4.08–4.01 (m, 4H), 3.97–3.91 (m, 2H), 3.89–3.87 (m, 5H), 3.53 (dd,  $J = 11.0, 3.5$  Hz, 1H), 3.48 (dd,  $J = 9.0, 7.0$  Hz, 1H), 3.35 (dd,  $J = 9.0, 6.0$  Hz, 1H), 2.52 (t,  $J = 7.8$  Hz, 2H), 2.30 (s, 3H), 1.96–1.88 (m, 2H), 1.81 (quin,  $J = 7.1$  Hz, 2H), 1.55 (quin,  $J = 7.4$  Hz, 2H), 1.48 (quin,  $J = 7.1$  Hz, 2H), 1.31–1.25 (m, 48H), 0.88 (t,  $J = 6.8$  Hz, 3H);  $^{13}\text{C NMR}$  (75 MHz,  $\text{CDCl}_3$ )  $\delta$  173.0, 139.7, 138.8, 138.7, 138.6, 137.9, 129.1, 128.6, 128.6, 128.6, 128.5, 128.5, 128.5, 128.2, 128.1, 128.0, 127.9, 127.8, 127.7, 117.6, 99.7, 81.0, 79.0, 77.4, 75.0, 74.9, 74.5, 73.7, 73.7, 73.1, 70.3, 70.2, 69.4, 52.4, 36.9, 35.5, 32.1, 31.6, 30.6, 29.9, 29.8, 29.7, 29.6, 29.6, 29.0, 26.7, 25.9, 22.9, 21.2, 14.3; LRMS(ESI<sup>+</sup>)  $m/z$  calcd for  $\text{C}_{94}\text{H}_{128}\text{N}_3\text{O}_9$   $[\text{M}+\text{H}]^+$ : 1442.97; Found: 1443.11.

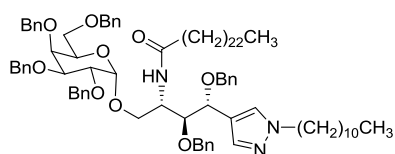

Compound **16a**; 58% yield;  $[\alpha]_{\text{D}}^{25} -3.29$  ( $c = 1.40$ ,  $\text{CHCl}_3$ );  $^1\text{H NMR}$  (500 MHz,  $\text{CDCl}_3$ )  $\delta$  7.54 (s, 1H), 7.41 (s, 1H), 7.37–7.22 (m, 30H), 6.13 (d,  $J = 9.0$  Hz, 1H), 4.91 (d,  $J = 11.5$  Hz, 1H), 4.80–4.76 (m, 3H), 6.72 (q,  $J = 5.5$  Hz, 2H), 4.63 (d,  $J = 12.0$  Hz, 1H), 4.56 (d,  $J = 11.5$  Hz, 1H), 4.49–4.45 (m, 3H), 4.35 (d,  $J = 11.5$  Hz, 1H), 4.22 (d,  $J = 12.0$  Hz, 1H), 4.10–4.06 (m, 1H), 4.05–4.00 (m, 3H), 3.97–3.91 (m, 2H), 3.90–3.87 (m, 3H), 3.54 (dd,  $J = 10.8, 3.8$  Hz, 1H), 3.47 (dd,  $J = 9.0, 6.5$  Hz, 1H), 3.35 (dd,  $J = 9.3, 5.8$  Hz, 1H), 1.97–1.86 (m, 2H), 1.81 (quin,  $J = 6.8$  Hz, 2H), 1.48 (quin,  $J = 7.0$  Hz, 2H), 1.30–1.1.16 (m, 56H), 0.89–0.86 (m, 6H).

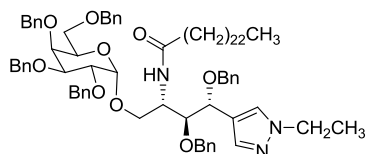

Compound **16b**; 59% yield;  $[\alpha]_{\text{D}}^{25} -3.46$  ( $c = 1.38$ ,  $\text{CHCl}_3$ );  $^1\text{H NMR}$  (500 MHz,  $\text{CDCl}_3$ )  $\delta$  7.54 (s, 1H), 7.44 (s, 1H), 7.35–7.23 (m, 30H), 6.16 (d,  $J = 9.5$  Hz, 1H), 4.91 (d,  $J = 12.0$  Hz, 1H), 4.81–4.71 (m, 5H), 4.64–4.55 (m, 3H), 4.50–4.45 (m, 3H), 4.35 (d,  $J = 12.0$  Hz, 1H), 4.23 (d,  $J = 12.0$  Hz, 1H), 4.09 (q,  $J = 7.3$  Hz, 2H), 4.07–3.98 (m, 2H), 3.97–3.12 (m, 2H), 3.89–

3.87 (m, 3H), 3.53 (dd,  $J = 11.0, 3.5$  Hz, 1H), 3.48 (dd,  $J = 9.3, 6.8$  Hz, 1H), 3.34 (dd,  $J = 9.3, 5.8$  Hz, 1H), 1.98–1.86 (m, 2H), 1.48 (quin,  $J = 7.0$  Hz, 2H), 1.44 (t,  $J = 7.5$  Hz, 3H), 1.33–1.16 (m, 40H), 0.88 (t,  $J = 6.8$  Hz, 3H);  $^{13}\text{C}$  NMR (75 MHz,  $\text{CDCl}_3$ )  $\delta$  173.0, 139.7, 138.8, 137.8, 129.2, 128.6, 128.6, 128.6, 128.5, 128.3, 128.1, 128.1, 128.0, 127.9, 127.8, 127.7, 127.6, 117.6, 99.8, 80.8, 79.0, 75.3, 74.9, 74.5, 73.7, 73.1, 70.4, 70.2, 69.7, 69.4, 50.2, 47.1, 37.5, 36.9, 32.1, 29.9, 29.9, 29.3, 29.7, 29.6, 25.9, 22.9, 15.7, 14.4.

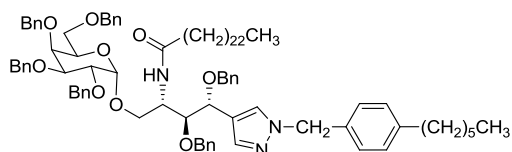

Compound **16c**; 82%;  $[\alpha]_{\text{D}}^{25} -1.96$  ( $c = 0.33, \text{CHCl}_3$ );  $^1\text{H}$  NMR (500 MHz,  $\text{CDCl}_3$ )  $\delta$  7.58 (s, 1H), 7.43 (s, 1H), 7.34–7.35 (m, 2H), 7.33–7.18 (m, 28H), 7.12–7.09 (m, 4H), 5.21 (d,  $J = 3.0$  Hz, 2H), 4.91 (d,  $J = 11.5$  Hz, 1H), 4.80–4.76 (m, 3H), 4.72–4.61 (m, 3H), 4.57–4.50 (m, 2H), 4.47–4.44 (m, 3H), 4.35 (d,  $J = 12.0$  Hz, 1H), 4.20 (d,  $J = 11.5$  Hz, 1H), 4.14–4.09 (m, 1H), 4.02 (dd,  $J = 10.3, 3.8$  Hz, 1H), 3.94–3.85 (m, 5H), 3.55 (dd,  $J = 10.8, 3.8$  Hz, 1H), 3.48 (dd,  $J = 9.5, 6.5$  Hz, 1H), 3.35 (dd,  $J = 9.3, 6.3$  Hz, 1H), 2.55 (t,  $J = 7.8$  Hz, 2H), 1.95–1.83 (m, 2H), 1.56 (quin,  $J = 7.5$  Hz, 2H), 1.46 (quin,  $J = 7.3$  Hz, 2H), 1.33–1.23 (m, 48H), 0.91–0.86 (m, 6H);  $^{13}\text{C}$  NMR (75 MHz,  $\text{CDCl}_3$ )  $\delta$  172.9, 142.9, 141.7, 138.8, 138.7, 138.6, 137.9, 134.1, 130.9, 129.0, 128.6, 128.6, 128.5, 128.5, 128.5, 128.2, 128.1, 128.0, 128.0, 127.9, 127.8, 127.6, 118.4, 99.7, 81.0, 79.0, 75.0, 75.0, 74.9, 74.5, 73.7, 73.6, 73.1, 70.3, 70.2, 69.4, 55.9, 50.4, 35.8, 32.1, 31.9, 31.6, 29.9, 29.9, 29.7, 29.6, 29.6, 29.2, 25.9, 22.9, 22.8, 14.3, 14.3

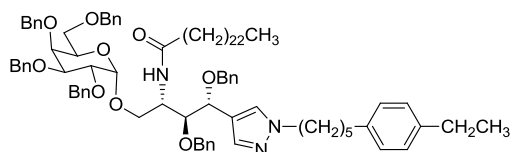

Compound **16d**; 81% yield;  $[\alpha]_{\text{D}}^{25} -2.42$  ( $c = 1.92, \text{CHCl}_3$ );  $^1\text{H}$  NMR (500 MHz,  $\text{CDCl}_3$ )  $\delta$  7.54 (s, 1H), 7.41 (s, 1H), 7.37–7.35 (m, 2H), 7.33–7.22 (m, 28H), 7.10–7.04 (m, 4H), 4.91 (d,  $J = 11.5$  Hz, 1H), 4.80–4.75 (m, 3H), 4.72 (d,  $J = 12.5$  Hz, 2H), 4.63 (d,  $J = 11.5$  Hz, 1H), 4.57 (d,  $J = 4.5$  Hz, 1H), 4.55 (d,  $J = 3.0$  Hz, 1H), 4.48–4.45 (m, 3H), 4.35 (d,  $J = 12.0$  Hz, 1H), 4.22 (d,  $J = 11.5$  Hz, 1H), 4.08–4.01 (m, 4H), 3.97–3.92 (m, 2H), 3.89–3.86 (m, 3H), 3.53 (dd,  $J = 11.0, 3.5$  Hz, 1H), 3.48 (dd,  $J = 9.3, 6.8$  Hz, 1H), 3.35 (dd,  $J = 9.5, 6.0$  Hz, 1H), 2.60 (q,  $J = 7.8$  Hz, 2H), 2.53 (t,  $J = 8.0$  Hz, 2H), 1.98–1.82 (m, 4H), 1.60 (quin,  $J = 7.8$  Hz, 2H), 1.48 (quin,  $J = 7.0$  Hz, 2H), 1.33–1.19 (m, 45H), 0.88 (t,  $J = 7.0$  Hz, 3H);  $^{13}\text{C}$  NMR (75 MHz,

CDCl<sub>3</sub>)  $\delta$  173.0, 141.7, 139.7, 138.8, 138.7, 138.6, 137.9, 129.8, 128.6, 128.6, 128.6, 128.5, 128.2, 128.1, 128.0, 128.0, 127.9, 127.8, 127.8, 127.7, 117.6, 99.7, 81.0, 79.0, 75.2, 75.0, 74.9, 74.5, 73.7, 73.7, 73.1, 70.3, 70.2, 69.5, 69.4, 52.4, 50.3, 36.9, 35.5, 32.1, 31.2, 30.5, 29.9, 29.8, 29.7, 29.6, 29.6, 28.6, 26.6, 25.9, 22.9, 15.8, 14.3.

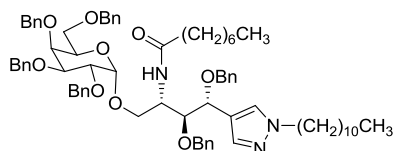

Compound **17a**; 69% yield;  $[\alpha]_D^{25}$   $-4.35$  ( $c = 1.40$ , CHCl<sub>3</sub>); <sup>1</sup>H NMR (500 MHz, CDCl<sub>3</sub>)  $\delta$  7.54 (s, 1H), 7.41 (s, 1H), 7.37–7.22 (m, 30H), 6.13 (d,  $J = 9.5$  Hz, 1H), 4.9. (d,  $J = 11.5$  Hz, 1H), 4.80–4.77 (m, 3H), 4.73 (q,  $J = 5.8$  Hz, 2H), 4.63 ( $J = 11.5$  Hz, 1H), 4.56 (dd,  $J = 11.5$ , 1.5 Hz, 2H), 4.49–4.45 (m, 3H), 4.35 (d,  $J = 12.0$  Hz, 1H), 4.22 (d,  $J = 12.0$  Hz, 1H), 4.10–4.06 (m, 1H), 4.05–4.00 (m, 3H), 3.97–3.91 (m, 2H), 3.90–3.86 (m, 3H), 3.54 (dd,  $J = 11.0$ , 3.5 Hz, 1H), 3.48 (dd,  $J = 9.5$ , 6.5 Hz, 1H), 3.35 (dd,  $J = 9.5$ , 6.0 Hz, 1H), 1.98–1.86 (m, 2H), 1.81 (quin,  $J = 7.0$  Hz, 2H), 1.48 (quin,  $J = 7.3$  Hz, 2H), 1.28–1.23 (m, 24H), 0.88–0.85 (m, 6H).

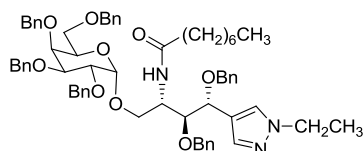

Compound **17b**; 84% yield;  $[\alpha]_D^{25}$   $-9.96$  ( $c = 1.35$ , CHCl<sub>3</sub>); <sup>1</sup>H NMR (500 MHz, CDCl<sub>3</sub>)  $\delta$  7.54 (s, 1H), 7.44 (s, 1H), 7.37–7.23 (m, 30H), 6.22 (d,  $J = 9.0$  Hz, 1H), 4.91 (d,  $J = 11.5$  Hz, 1H), 4.80–4.71 (m, 5H), 4.64–4.55 (m, 3H), 4.50–4.45 (m, 3H), 4.35 (d,  $J = 12.0$  Hz, 1H), 4.23 (d,  $J = 12.0$  Hz, 1H), 4.12 (q,  $J = 7.3$  Hz, 2H), 4.03–4.01 (m, 2H), 3.97–3.92 (m, 2H), 3.89–3.87 (m, 3H), 3.53 (dd,  $J = 11.0$ , 3.0 Hz, 1H), 3.48 (dd,  $J = 9.3$ , 6.8 Hz, 1H), 3.34 (dd,  $J = 9.3$ , 5.8 Hz, 1H), 2.34 (t,  $J = 7.5$  Hz, 2H), 1.98–1.89 (m, 2H), 1.63 (quin,  $J = 7.3$  Hz, 2H), 1.49 (quin,  $J = 7.5$  Hz, 2H), 1.44 (t,  $J = 7.5$  Hz, 3H), 1.31–1.23 (m, 4H); <sup>13</sup>C NMR (75 MHz, CDCl<sub>3</sub>)  $\delta$  173.1, 139.7, 138.8, 138.8, 138.6, 138.6, 137.9, 128.6, 128.6, 128.5, 128.5, 128.5, 128.2, 128.1, 128.0, 127.9, 127.8, 127.7, 127.6, 117.6, 99.7, 80.9, 79.0, 75.3, 75.0, 74.5, 73.7, 73.1, 70.4, 70.2, 69.6, 69.4, 50.3, 47.1, 36.9, 32.0, 31.8, 29.9, 29.5, 29.3, 29.1, 25.9, 25.0, 22.9, 22.8, 15.7, 14.3.

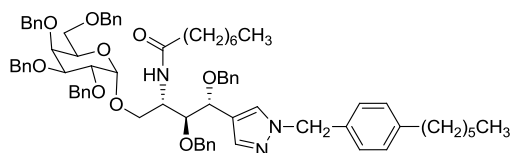

Compound **17c**; 85% yield;  $[\alpha]_{\text{D}}^{25}$  -2.51 ( $c = 1.40$ ,  $\text{CHCl}_3$ );  $^1\text{H NMR}$  (500 MHz,  $\text{CDCl}_3$ )  $\delta$  7.58 (s, 1H), 7.43 (s, 1H), 7.36–7.35 (m, 2H), 7.33–7.18 (m, 28H), 7.12–7.08 (m, 4H), 5.21 (d,  $J = 3.0$  Hz, 2H), 4.91 (d,  $J = 11.5$  Hz, 1H), 4.78 (q,  $J = 5.8$  Hz, 3H), 4.72–4.61 (m, 3H), 4.57–4.50 (m, 2H), 4.46–4.44 (m, 3H), 4.35 (d,  $J = 12.0$  Hz, 1H), 4.20 (d,  $J = 12.0$  Hz, 1H), 4.12–4.08 (m, 1H), 4.02 (dd,  $J = 10.5, 3.5$  Hz, 1H), 3.94–3.85 (m, 5H), 3.55 (dd,  $J = 11.0, 3.5$  Hz, 1H), 3.48 (dd,  $J = 9.0, 6.5$  Hz, 1H), 3.35 (dd,  $J = 9.0, 6.0$  Hz, 1H), 2.55 (t,  $J = 7.8$  Hz, 2H), 1.95–1.83 (m, 2H), 1.56 (quin,  $J = 7.5$  Hz, 2H), 1.47 (quin,  $J = 7.3$  Hz, 2H), 1.33–1.16 (m, 14H), 0.91–0.8 (m, 6H);  $^{13}\text{C NMR}$  (75 MHz,  $\text{CDCl}_3$ )  $\delta$  172.9, 142.9, 138.8, 138.7, 137.9, 134.1, 130.1, 129.0, 128.6, 128.6, 128.6, 128.5, 128.5, 128.2, 128.1, 128.1, 128.0, 127.9, 127.8, 127.8, 127.6, 118.5, 99.7, 81.0, 79.1, 75.0, 74.9, 74.5, 73.7, 73.6, 73.2, 70.3, 70.2, 69.4, 56.0, 50.3, 36.9, 35.8, 32.0, 31.9, 31.6, 29.9, 29.5, 29.3, 29.2, 25.9, 22.9, 22.8, 14.3.

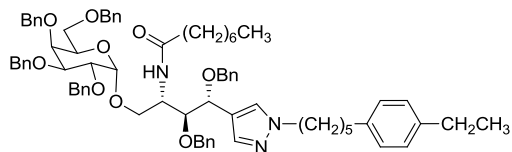

Compound **17d**; 91% yield;  $[\alpha]_{\text{D}}^{25}$  +9.42 ( $c = 1.43$ ,  $\text{CHCl}_3$ );  $^1\text{H NMR}$  (500 MHz,  $\text{CDCl}_3$ )  $\delta$  7.56 (s, 1H), 7.43 (s, 1H), 7.39–7.37 (m, 2H), 7.35 (m, 28H), 7.11–7.06 (m, 4H), 6.19 (d,  $J = 9.0$  Hz, 1H), 4.93 (d,  $J = 11.5$  Hz, 1H), 4.82–4.77 (m, 3H), 4.75–4.72 (m, 2H), 4.64 (d,  $J = 11.5$  Hz, 1H), 4.59 (d,  $J = 6.0$  Hz, 1H), 4.47 (d,  $J = 8.5$  Hz, 1H), 4.50–4.46 (m, 3H), 4.37 (d,  $J = 12.0$  Hz, 1H), 4.23 (d,  $J = 11.5$  Hz, 1H), 4.08–4.03 (m, 4H), 3.99–3.93 (m, 2H), 3.91–3.87 (m, 3H), 3.55 (dd,  $J = 10.5, 3.5$  Hz, 1H), 3.50 (dd,  $J = 9.3, 6.8$  Hz, 1H), 3.36 (dd,  $J = 9.0, 6.0$  Hz, 1H), 2.61 (q,  $J = 7.8$  Hz, 2H), 2.55 (t,  $J = 7.5$  Hz, 2H), 2.00–1.84 (m, 4H), 1.62 (quin,  $J = 8.0$  Hz, 2H), 1.50 (quin,  $J = 7.5$  Hz, 2H), 1.36–1.19 (m, 13H), 0.88 (t,  $J = 7.3$  Hz, 3H);  $^{13}\text{C NMR}$  (75 MHz,  $\text{CDCl}_3$ )  $\delta$  172.9, 141.7, 139.7, 138.8, 138.7, 138.6, 137.8, 129.8, 128.6, 128.6, 128.5, 128.5, 128.2, 128.1, 128.1, 128.0, 128.0, 127.9, 127.8, 127.7, 117.5, 99.8, 80.9, 79.0, 75.2, 74.9, 74.5, 73.7, 73.7, 73.1, 70.3, 70.2, 69.6, 69.4, 52.4, 50.2, 36.9, 35.5, 32.0, 31.3, 30.5, 29.9, 29.5, 29.3, 28.6, 26.6, 25.9, 22.9, 15.9, 14.3.

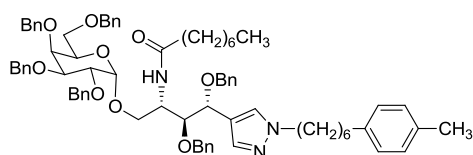

Compound **17e**; 79% yield;  $[\alpha]_{\text{D}}^{25} +4.62$  ( $c = 1.0$ ,  $\text{CHCl}_3$ );  $^1\text{H NMR}$  (500 MHz,  $\text{CDCl}_3$ )  $\delta$  7.53 (s, 1H), 7.40–7.19 (m, 31H), 7.07–7.02 (m, 4H), 6.16 (d,  $J = 9.5$  Hz, 1H), 4.91 (d,  $J = 12.0$  Hz, 1H), 4.78–4.67 (m, 5H), 4.62 (d,  $J = 12.0$  Hz, 1H), 4.55 (dd,  $J = 11.3, 1.3$  Hz, 2H), 4.48–4.45 (m, 3H), 4.37–4.32 (m, 1H), 4.22 (d,  $J = 12.0$  Hz, 1H), 4.10–4.01 (m, 4H), 3.96–3.85 (m, 5H), 3.57 (dd,  $J = 10.8, 3.8$  Hz, 1H), 3.48 (dd,  $J = 9.5, 6.5$  Hz, 1H), 3.36 (dd,  $J = 9.5, 6.0$  Hz, 1H), 2.52 (t,  $J = 7.8$  Hz, 2H), 2.30 (s, 3H), 1.98–1.78 (m, 4H), 1.55 (quin,  $J = 7.5$  Hz, 2H), 1.48 (quin,  $J = 7.5$  Hz, 2H), 1.35–1.20 (m, 12H), 0.86 (t,  $J = 7.0$  Hz, 3H).

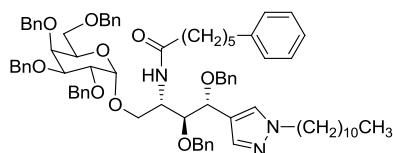

Compound **18a**; 61% yield;  $[\alpha]_{\text{D}}^{25} -2.10$  ( $c = 1.16$ ,  $\text{CHCl}_3$ );  $^1\text{H NMR}$  (500 MHz,  $\text{CDCl}_3$ )  $\delta$  7.53 (s, 1H), 7.40 (s, 1H), 7.35–7.22 (m, 32H), 7.17–7.13 (m, 3H), 1.91 (d,  $J = 11.5$  Hz, 1H), 4.78–4.76 (m, 3H), 4.70 (d,  $J = 11.0$  Hz, 2H), 4.62 (d,  $J = 11.5$  Hz, 1H), 4.55 (dd,  $J = 11.3, 4.3$  Hz, 2H), 4.48–4.53 (m, 3H), 4.34 (d,  $J = 12.0$  Hz, 1H), 4.22 (d,  $J = 11.5$  Hz, 1H), 4.11–4.06 (m, 1H), 4.05–4.01 (m, 3H), 3.95–3.86 (m, 5H), 3.54 (dd,  $J = 11.0, 3.0$  Hz, 1H), 3.50–3.47 (m, 1H), 3.36 (dd,  $J = 8.8, 6.3$  Hz, 1H), 2.56 (t,  $J = 7.8$  Hz, 2H), 1.95–1.86 (m, 2H), 1.57 (quin,  $J = 7.5$  Hz, 2H), 1.51 (quin,  $J = 7.5$  Hz, 2H), 1.29–1.23 (m, 18H), 0.87 (t,  $J = 6.5$  Hz, 3H).

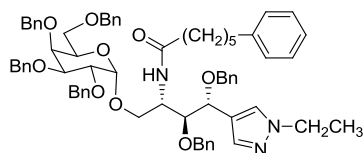

Compound **18b**; 75% yield;  $[\alpha]_{\text{D}}^{25} +3.09$  ( $c = 0.50$ ,  $\text{CHCl}_3$ );  $^1\text{H NMR}$  (500 MHz,  $\text{CDCl}_3$ )  $\delta$  7.54 (s, 1H), 7.44 (s, 1H), 7.36–7.22 (m, 29H), 7.18–7.13 (m, 4H), 6.16 (d,  $J = 9.0$  Hz, 1H), 4.91 (d,  $J = 11.5$  Hz, 1H), 4.79–4.70 (m, 5H), 4.62 (d, 11.5 Hz, 1H), 4.56 (t,  $J = 10.5$  Hz, 2H), 4.49–4.43 (m, 3H), 4.33 (d,  $J = 12.0$  Hz, 1H), 4.22 (d,  $J = 12.0$  Hz, 1H), 4.11 (q,  $J = 7.3$  Hz, 2H), 4.06–4.00 (m, 2H), 3.97 (dd,  $J = 11.0, 4.0$  Hz, 1H), 3.92 (dd,  $J = 8.0, 3.5$  Hz, 1H), 3.89–3.85 (m, 3H), 3.52 (dd,  $J = 11.0, 3.5$  Hz, 1H), 3.48 (dd,  $J = 9.5, 7.0$  Hz, 1H), 3.33 (dd,  $J = 9.3,$



5.8 Hz, 1H), 2.56 (t,  $J = 7.8$  Hz, 2H), 1.97–1.84 (m, 2H), 1.70–1.48 (m, 6H), 1.44 (t,  $J = 7.3$  Hz, 3H).

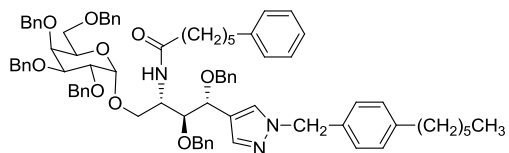

Compound **18c**; 82% yield;  $[\alpha]_D^{25} -0.55$  ( $c = 1.41$ ,  $\text{CHCl}_3$ );  $^1\text{H NMR}$  (500 MHz,  $\text{CDCl}_3$ )  $\delta$  7.58 (s, 1H), 7.42 (s, 1H), 7.35–7.34 (m, 2H), 7.32–7.14 (m, 28H), 7.11–7.01 (m, 4H), 6.06 (d,  $J = 9.0$  Hz, 1H), 5.21 (d,  $J = 3.0$  Hz, 2H), 4.90 (d,  $J = 11.5$  Hz, 1H), 4.78–4.75 (m, 3H), 4.70 (d,  $J = 12.0$  Hz, 1H), 4.63 (t,  $J = 12.0$  Hz, 2H), 4.55 (d,  $J = 11.5$  Hz, 1H), 4.49 (d,  $J = 11.0$  Hz, 1H), 4.44 (dd,  $J = 11.0, 4.5$  Hz, 3H), 4.33 (d,  $J = 12.0$  Hz, 1H), 4.20 (d,  $J = 12.0$  Hz, 1H), 4.16–4.11 (m, 1H), 4.01 (dd,  $J = 10.3, 3.3$  Hz, 1H), 3.92–3.84 (m, 5H), 3.55 (dd,  $J = 10.8, 3.8$  Hz, 1H), 3.48 (dd,  $J = 9.5, 3.5$  Hz, 1H), 3.35 (dd,  $J = 9.5, 6.0$  Hz, 1H), 2.55 (t,  $J = 8.0$  Hz, 4H), 1.93–1.80 (m, 2H), 1.58–1.46 (m, 4H), 1.33–1.20 (m, 10H), 0.87 (t,  $J = 7.0$  Hz, 3H).

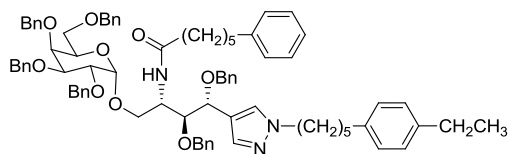

Compound **18d**; 82% yield;  $[\alpha]_D^{25} -1.95$  ( $c = 1.41$ ,  $\text{CHCl}_3$ );  $^1\text{H NMR}$  (500 MHz,  $\text{CDCl}_3$ )  $\delta$  7.54 (s, 1H), 7.40 (s, 1H), 7.35–7.34 (m, 2H), 7.32–7.21 (m, 30H), 7.17–7.14 (m, 3H), 7.09–7.04 (m, 4H), 4.90 (d,  $J = 11.5$  Hz, 1H), 4.78–7.76 (m, 3H), 4.71 (t,  $J = 10.5$  Hz, 2H), 4.62 (d,  $J = 11.5$  Hz, 1H), 4.55 (d,  $J = 11.5$  Hz, 2H), 4.48–4.43 (m, 3H), 4.34 (d,  $J = 12.0$  Hz, 1H), 4.21 (d,  $J = 12.0$ , 1H), 4.09–3.96 (m, 4H), 3.95–3.85 (m, 5H), 3.53 (dd,  $J = 10.8, 3.8$  Hz, 1H), 3.48 (dd,  $J = 9.5, 6.5$  Hz, 1H), 3.35 (dd,  $J = 9.5, 6.0$  Hz, 1H), 2.62–2.51 (m, 6H), 1.96–1.82 (m, 4H), 1.63–1.48 (m, 6H), 1.34–1.24 (m, 4H), 1.21 (t,  $J = 7.5$  Hz, 3H);  $^{13}\text{C NMR}$  (75 MHz,  $\text{CDCl}_3$ )  $\delta$  172.8, 142.7, 141.7, 139.7, 138.8, 138.7, 138.6, 137.9, 129.8, 128.6, 128.6, 128.5, 128.5, 128.2, 128.1, 128.0, 128.0, 127.9, 127.8, 127.8, 127.7, 125.9, 117.6, 99.8, 81.0, 89.0, 75.1, 74.9, 74.9, 74.5, 79.7, 73.1, 70.3, 70.2, 69.4, 50.4, 50.3, 36.7, 36.0, 35.5, 31.4, 31.3, 30.5, 29.9, 29.2, 28.6, 26.6, 25.7, 15.9.

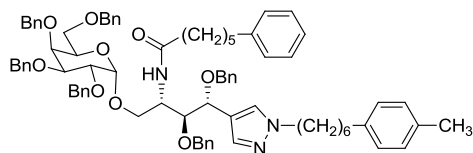

Compound **18e**; 76% yield;  $[\alpha]_D^{25}$  -4.17 ( $c = 1.0$ ,  $\text{CHCl}_3$ );  $^1\text{H NMR}$  (500 MHz,  $\text{CDCl}_3$ )  $\delta$  7.53 (s, 1H), 7.39 (s, 1H), 7.35–7.21 (m, 32H), 7.17–7.13 (m, 3H), 7.07–7.01 (m, 4H), 6.14 (d,  $J = 9.0$  Hz, 1H), 4.90 (d,  $J = 11.5$  Hz, 1H), 4.78–4.76 (m, 3H), 4.73–4.69 (m, 2H), 4.62 (d,  $J = 11.5$  Hz, 1H), 4.54 (dd,  $J = 11.3, 2.8$  Hz, 2H), 4.48–4.43 (m, 3H), 4.34 (d,  $J = 12.0$  Hz, 1H), 4.21 (d,  $J = 12.0$  Hz, 1H), 4.10–4.00 (m, 4H), 3.95–3.95 (m, 5H), 3.53 (dd,  $J = 11.0, 3.5$  Hz, 1H), 3.48 (dd,  $J = 9.5, 6.5$  Hz, 1H), 3.35 (dd,  $J = 9.5, 6.0$  Hz, 1H), 2.57–2.50 (m, 4H), 2.30 (s, 3H), 1.96–1.78 (m, 4H), 1.67–1.48 (m, 6H), 1.39–1.21 (m, 6H).

### General procedure of click reaction for the preparation of **19**

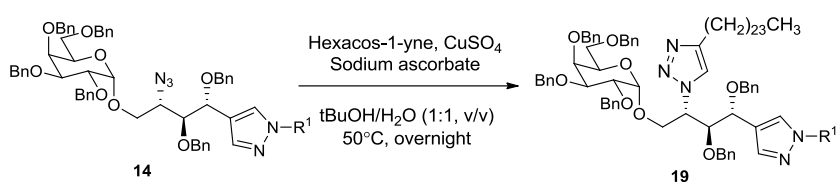

To a stirred solution of **19** (1.0 equiv.) in  $\text{tBuOH}/\text{H}_2\text{O}$  (1:1, v/v), hexacos-1-yne (1.5 equiv.),  $\text{CuSO}_4$  (0.15 equiv.), and sodium ascorbate (0.6 equiv.) were added. The mixture was stirred at  $50^\circ\text{C}$  for overnight. After completion of reaction monitored by TLC, solvent was evaporated under reduced pressure and the resulting mixture was diluted with  $\text{EtOAc}$  and washed with brine. The combined organic layer was dried over anhydrous  $\text{Na}_2\text{SO}_4(\text{s})$ . The filtrate was condensed under reduced pressure and purified by silica-gel flash column chromatography ( $\text{EtOAc}:\text{Hex} = 1:4$ , v/v) to provide the desired product **19**.

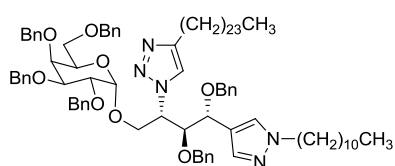

Compound **19a**; 75% yield;  $[\alpha]_D^{25}$  -8.39 ( $c = 0.65$ ,  $\text{CHCl}_3$ );  $^1\text{H NMR}$  (500 MHz,  $\text{CDCl}_3$ )  $\delta$  7.74 (s, 1H), 7.38–7.20 (m, 30H), 7.15–7.13 (m, 2H), 4.89 (d,  $J = 11.5$  Hz, 1H), 4.83–4.80 (m, 2H), 4.76 (d, 12.0 Hz, 1H), 4.69 (t,  $J = 11.5$  Hz, 2H), 4.58 (d,  $J = 11.0$  Hz, 1H), 4.53 (dd,  $J = 11.8, 4.8$  Hz, 2H), 4.42–4.38 (m, 3H), 4.33–4.30 (m, 2H), 4.16 (d,  $J = 11.5$  Hz, 1H), 4.11 (dd,  $J = 11.0, 6.5$  Hz, 1H), 4.04 (t,  $J = 7.5$  Hz, 2H), 4.01–3.98 (m, 2H), 3.95 (dd,  $J = 11.3, 2.8$  Hz), 3.88 (d,  $J = 2.0$  Hz, 1H), 3.81 (dd,  $J = 10.3, 2.8$  Hz, 1H), 3.61 (t,  $J = 6.3$  Hz, 1H), 3.45–3.38 (m, 2H), 2.62–2.51 (m, 2H), 1.81 (quin,  $J = 7.0$  Hz, 2H), 1.55 (quin,  $J = 7.5$  Hz, 2H), 1.33–1.23 (m, 58H), 0.89–0.83 (m, 6H);  $^{13}\text{C NMR}$  (75 MHz,  $\text{CDCl}_3$ )  $\delta$  148.4, 139.6, 138.8, 138.7, 138.6, 138.3, 138.1, 129.5, 128.6, 128.5, 128.5, 128.4, 128.4, 128.0, 127.9,

127.8, 127.7, 127.6, 121.4, 117.2, 98.8, 81.1, 79.1, 76.3, 75.0, 74.9, 74.1, 73.6, 73.4, 73.0, 70.3, 69.9, 68.9, 66.6, 61.9, 52.6, 32.1, 32.1, 30.6, 29.9, 29.8, 29.7, 29.6, 29.5, 29.4, 26.9, 26.0, 22.9, 14.4.

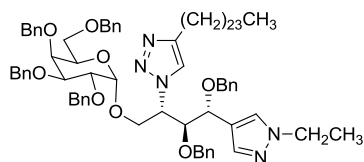

Compound **19b**; 88% yield;  $[\alpha]_D^{25} +9.21$  ( $c = 1.0$ ,  $\text{CHCl}_3$ );  $^1\text{H NMR}$  (500 MHz,  $\text{CDCl}_3$ )  $\delta$  7.44 (s, 1H), 7.37 (s, 1H), 7.35–7.21 (m, 31H), 7.16–7.14 (m, 2H), 4.89 (d,  $J = 11.5$  Hz, 1H), 4.80–4.77 (m, 2H), 4.74–4.66 (m, 3H), 4.61 (d,  $J = 11.0$  Hz, 1H), 4.53 (dd,  $J = 11.5, 5.0$  Hz, 2H), 4.44–4.39 (m, 3H), 4.33–4.31 (m, 2H), 4.17 (d,  $J = 12.0$  Hz, 1H), 4.11 (q,  $J = 7.0$  Hz, 3H), 4.00–3.98 (m, 2H), 3.96 (dd,  $J = 11.3, 2.8$  Hz, 1H), 3.88 (d,  $J = 2.0$  Hz, 1H), 3.81 (dd,  $J = 10.0, 2.5$  Hz, 1H), 3.62 (t,  $J = 6.5$  Hz, 1H), 3.46–3.38 (m, 2H), 2.62–2.51 (m, 2H), 1.55 (quin,  $J = 7.5$  Hz, 2H), 1.44 (t,  $J = 7.5$  Hz, 3H), 1.30–1.23 (m, 42H), 0.88 (t,  $J = 6.8$  Hz, 3H);  $^{13}\text{C NMR}$  (75 MHz,  $\text{CDCl}_3$ )  $\delta$  148.5, 139.6, 138.8, 138.6, 138.3, 138.2, 128.9, 128.6, 128.5, 128.5, 128.4, 128.4, 128.1, 128.0, 127.9, 127.8, 127.7, 127.6, 121.4, 117.3, 98.8, 81.0, 79.2, 76.3, 75.0, 74.9, 74.2, 73.6, 73.4, 73.0, 70.4, 69.9, 68.9, 66.7, 61.8, 47.2, 32.1, 29.9, 29.8, 29.7, 29.6, 26.0, 22.9, 15.7, 14.3.

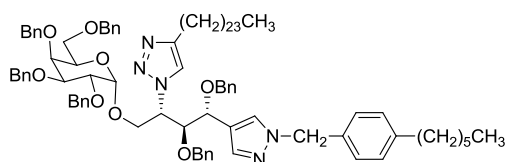

Compound **19c**; 60% yield;  $[\alpha]_D^{25} +9.32$  ( $c = 1.6$ ,  $\text{CHCl}_3$ );  $^1\text{H NMR}$  (500 MHz,  $\text{CDCl}_3$ )  $\delta$  7.49 (s, 1H), 7.36–7.76 (m, 29H), 7.10–7.07 (m, 6H), 5.20 (s, 2H), 4.89 (d,  $J = 11.0$  Hz, 1H), 4.86–4.83 (m, 1H), 4.80 (d,  $J = 3.0$  Hz, 1H), 4.76–7.65 (m, 3H), 4.53 (d,  $J = 11.5$  Hz, 2H), 4.48 (d,  $J = 10.4$  Hz, 1H), 4.41–4.26 (m, 5H), 4.16–4.09 (m, 2H), 4.00–4.39 (m, 3H), 3.87 (s, 1H), 3.80 (dd,  $J = 10.0, 2.0$  Hz, 1H), 3.61 (t,  $J = 6.3$  Hz, 1H), 3.42 (m, 2H), 2.57–2.53 (m, 4H), 1.59–1.51 (m, 4H), 1.27–1.23 (m, 48H), 0.89–0.86 (m, 6H);  $^{13}\text{C NMR}$  (75 MHz,  $\text{CDCl}_3$ ) 148.4, 143.1, 139.9, 138.8, 138.6, 138.2, 138.0, 133.7, 129.8, 129.1, 128.6, 128.5, 128.4, 128.4, 128.0, 127.9, 127.8, 127.7, 127.6, 121.4, 118.2, 98.8, 81.3, 79.1, 76.4, 75.0, 74.9, 74.0, 73.6, 73.4, 73.0, 70.4, 69.9, 69.0, 66.6, 61.9, 60.6, 56.1, 53.6, 35.8, 32.1, 31.9, 31.6, 29.9, 29.7, 29.7, 29.6, 29.2, 26.0, 22.9, 22.8, 21.3, 14.4, 14.3, 14.3.

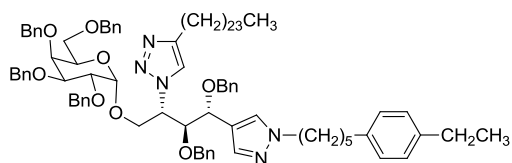

Compound **19d**; 72% yield;  $[\alpha]_D^{25} +6.73$  ( $c = 1.85$ ,  $\text{CHCl}_3$ );  $^1\text{H NMR}$  (500 MHz,  $\text{CDCl}_3$ )  $\delta$  7.44 (s, 1H), 7.37–7.20 (m, 30H), 7.15–7.13 (m, 2H), 7.09–7.04 (m, 4H), 4.88 (d,  $J = 11.5$  Hz, 1H), 4.81–4.79 (m, 2H), 4.75 (d,  $J = 11.5$  Hz, 1H), 4.71–4.66 (m, 2H), 4.59 (d,  $J = 11.0$  Hz, 1H), 4.53 (dd,  $J = 1.5, 6.0$  Hz, 2H), 4.42–4.38 (m, 3H), 4.33–4.30 (m, 2H), 4.16 (d,  $J = 12.0$  Hz, 1H), 4.11 (dd,  $J = 11.3, 6.8$  Hz, 1H), 4.04–3.98 (m, 4H), 3.95 (dd,  $J = 10.5, 3.5$  Hz, 1H), 3.87 (d,  $J = 1.5$  Hz, 1H), 3.80 (dd,  $J = 10.3, 2.8$  Hz, 1H), 3.62 (t,  $J = 6.0$  Hz, 1H), 3.46–3.38 (m, 2H), 2.62–2.51 (m, 6H), 1.85 (quin,  $J = 7.5$  Hz, 2H), 1.64–1.52 (m, 4H), 1.34–1.19 (m, 47H), 0.88 (t,  $J = 7.0$  Hz, 3H);  $^{13}\text{C NMR}$  (75 MHz,  $\text{CDCl}_3$ ) 148.5, 141.8, 139.6, 138.8, 138.6, 138.3, 138.2, 129.6, 128.6, 128.5, 128.5, 128.4, 128.4, 128.0, 128.0, 127.9, 127.8, 127.7, 127.6, 121.6, 117.3, 98.8, 81.1, 79.2, 76.4, 75.0, 74.9, 74.1, 73.6, 73.4, 73.0, 70.4, 69.9, 68.9, 66.6, 61.9, 61.9, 52.5, 35.5, 32.1, 31.2, 30.4, 29.9, 29.8, 29.7, 29.6, 28.6, 26.5, 26.0, 22.9, 15.9, 14.3.

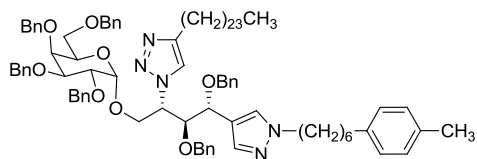

Compound **19e**; 56% yield;  $[\alpha]_D^{25} +6.75$  ( $c = 1.0$ ,  $\text{CHCl}_3$ );  $^1\text{H NMR}$  (500 MHz,  $\text{CDCl}_3$ )  $\delta$  7.43 (s, 1H), 7.38–7.20 (m, 30H), 7.14–7.13 (m, 2H), 7.07–7.01 (m, 4H), 4.89 (d,  $J = 11.0$  Hz, 1H), 4.81–4.79 (m, 2H), 4.77–4.66 (m, 3H), 4.58 (d,  $J = 11.0$  Hz, 1H), 4.53 (dd,  $J = 11.8, 5.3$  Hz, 2H), 4.42–4.38 (m, 3H), 4.31 (dd,  $J = 11.3, 3.8$  Hz, 2H), 4.16 (d,  $J = 11.5$  Hz, 1H), 4.11 (dd,  $J = 11.3, 6.8$  Hz, 1H), 4.04–3.98 (m, 4H), 3.95 (dd,  $J = 11.0, 2.0$  Hz, 1H), 3.61 (t,  $J = 6.5$  Hz, 1H), 3.46–3.38 (m, 2H), 2.60–2.51 (m, 4H), 2.30 (s, 3H), 1.81 (quin,  $J = 7.3$  Hz, 2H), 1.56–1.52 (m, 4H), 1.30–1.23 (m, 49H), 0.88 (t,  $J = 6.5$  Hz, 3H).

## General Procedure for the benzyl deprotection via hydrogenation for final compounds

### 1–5

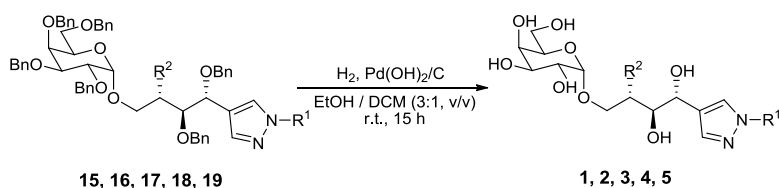

Compound **15–19** and Pd(OH)<sub>2</sub>/C (equal wt. quantity to starting material, 20 wt. % loading) were dissolved in EtOH/DCM co-solvent (1 mM concentration). Then, the mixture was stirred under H<sub>2</sub> environment at atmospheric pressure for 15 h. After completion of reaction monitored by TLC, the catalyst was removed by filtration through 0.45 μm PTFE syringe filter and washed with MeOH/DCM (1:1, v/v) solution. The filtrate was concentrated under reduced pressure to provide the desired product **1–5** as an amorphous white solid.

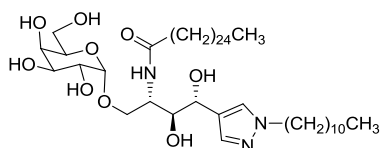

Compound **1a**; 54% yield;  $[\alpha]_D^{25} +41.9$  ( $c = 0.56$ , CHCl<sub>3</sub>/MeOH = 1:1); <sup>1</sup>H NMR (500 MHz, CD<sub>3</sub>OD; reference peak : CD<sub>3</sub>OD at 3.31 ppm)  $\delta$  7.61 (s, 1H), 7.59 (s, 1H), 4.93 (d,  $J = 4.0$  Hz, 1H), 4.69 (d,  $J = 4.5$  Hz, 1H), 4.11 (t,  $J = 7.2$  Hz, 2H), 4.05 (m, 1H), 3.94 (d,  $J = 2.5$  Hz, 1H), 3.88–3.81 (m, 4H), 3.78–3.72 (m, 4H), 2.18 (t,  $J = 7.5$  Hz, 2H), 1.86–1.82 (m, 2H), 1.65–1.59 (m, 2H), 1.35–1.22 (m, 60H), 0.85 (t,  $J = 7.0$  Hz, 6H).

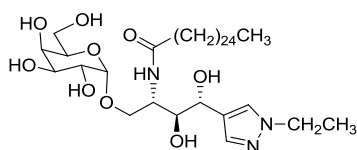

Compound **1b**; 59% yield;  $[\alpha]_D^{25} +37.6$  ( $c = 1.0$ , CHCl<sub>3</sub>/MeOH = 1:1); <sup>1</sup>H NMR (500 MHz, CDCl<sub>3</sub>/CD<sub>3</sub>OD = 1:1; reference peak : CD<sub>3</sub>OD at 3.31 ppm)  $\delta$  7.69 (d,  $J = 9.0$  Hz, 1H), 7.51 (s, 1H), 7.48 (s, 1H), 4.89 (d,  $J = 3.5$  Hz, 1H), 4.11 (q,  $J = 7.3$  Hz, 2H), 4.04 (m, 1H), 3.91 (d,  $J = 1.5$  Hz, 1H), 3.85–3.70 (m, 8H), 2.18 (t,  $J = 7.5$  Hz, 2H), 1.60–1.57 (m, 2H), 1.43 (t,  $J = 7.3$  Hz, 3H), 1.31–1.24 (m, 44H), 0.85 (t,  $J = 6.8$  Hz, 3H); <sup>13</sup>C NMR (75 MHz, CDCl<sub>3</sub>)  $\delta$  175.4, 138.7, 128.8, 122.3, 100.6, 78.5, 74.8, 71.7, 71.0, 70.5, 69.7, 67.9, 62.4, 51.3, 47.4, 37.1, 32.6, 30.4, 30.3, 30.1, 30.1, 26.6, 23.3, 20.7, 15.9, 14.5; HRMS (FAB+)  $m/z$  calcd for C<sub>41</sub>H<sub>78</sub>N<sub>3</sub>O<sub>9</sub> [M+H]<sup>+</sup>: 756.5738; Found: 756.5742.

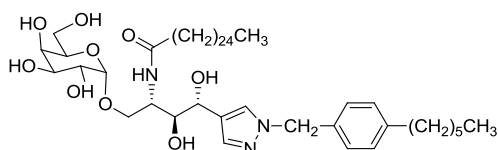

Compound **1c**; 78% yield;  $[\alpha]_D^{25} +34.1$  ( $c = 1.1$ , CHCl<sub>3</sub>/MeOH = 1:1); <sup>1</sup>H NMR (500 MHz, CDCl<sub>3</sub>/CD<sub>3</sub>OD = 1:1; reference peak : CD<sub>3</sub>OD at 3.31 ppm)  $\delta$  7.58 (d,  $J = 8.5$  Hz, 1H), 7.52

(s, 1H), 7.50 (s, 1H), 7.11 (s, 4H), 5.20 (s, 2H), 4.89 (d,  $J = 3.5$  Hz, 1H), 4.64 (m, 1H), 4.06 (m, 1H), 3.90 (d,  $J = 2.5$  Hz, 1H), 3.84–3.76 (m, 4H), 3.74–3.67 (m, 4H), 2.55 (t,  $J = 7.5$  Hz, 2H), 2.15 (m, 2H), 1.56–1.52 (m, 4H), 1.26–1.24 (m, 50H), 0.87–0.84 (m, 6H);  $^{13}\text{C}$  NMR (75 MHz,  $\text{CDCl}_3$ )  $\delta$  175.3, 143.6, 139.0, 134.3, 129.6, 129.4, 128.4, 123.0, 100.5, 71.6, 70.9, 70.5, 69.7, 67.8, 62.4, 56.2, 51.2, 37.0, 36.2, 32.6, 32.4, 32.1, 30.3, 30.1, 29.6, 26.6, 23.3, 23.2, 14.5.

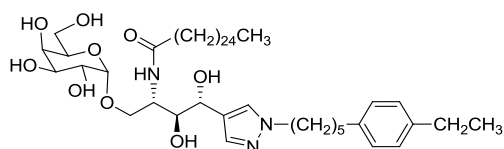

Compound **1d**; 95% yield;  $[\alpha]_{\text{D}}^{25} +42.14$  ( $c = 0.70$ ,  $\text{CHCl}_3$ );  $^1\text{H}$  NMR (500 MHz,  $\text{CDCl}_3$ )  $\delta$  7.50 (s, 1H), 7.49 (s, 1H), 7.06 (d,  $J = 7.5$  Hz, 2H), 7.04 (d,  $J = 8.0$  Hz, 2H), 4.89 (d,  $J = 4.0$  Hz, 1H), 4.66 (d,  $J = 6.0$  Hz, 1H), 4.07–4.01 (m, 3H), 3.90 (d,  $J = 3.0$  Hz, 1H), 3.84–3.67 (m, 8H), 2.60–2.52 (m, 4H), 2.18 (t,  $J = 7.7$  Hz, 2H), 1.84 (quin,  $J = 7.5$  Hz, 2H), 1.64–1.58 (m, 5H), 1.33–1.24 (m, 46H), 1.19 (t,  $J = 7.7$  Hz, 3H), 0.86 (t,  $J = 7.0$  Hz, 3H); HRMS (FAB+)  $m/z$  calcd for  $\text{C}_{52}\text{H}_{92}\text{N}_3\text{O}_9$   $[\text{M}+\text{H}]^+$ : 902.6834; Found: 902.6845.

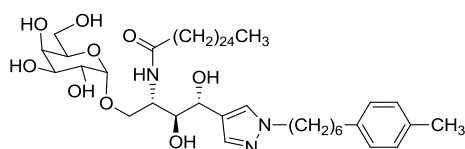

Compound **1e**; 96% yield;  $[\alpha]_{\text{D}}^{25} +38.5$  ( $c = 0.85$ ,  $\text{CHCl}_3/\text{MeOH} = 1:1$ );  $^1\text{H}$  NMR (500 MHz,  $\text{CDCl}_3/\text{CD}_3\text{OD} = 1:1$ ; reference peak :  $\text{CD}_3\text{OD}$  at 3.31 ppm)  $\delta$  7.61 (s, 1H), 7.57 (s, 1H), 7.03 (d,  $J = 8.0$  Hz, 2H), 7.00 (d,  $J = 8.0$  Hz, 2H), 4.89 (d,  $J = 3.5$  Hz, 1H), 4.13–4.09 (m, 2H), 4.00–3.98 (m, 1H), 3.90 (d,  $J = 3.5$  Hz, 1H), 3.83–3.61 (m, 8H), 2.52 (t,  $J = 7.5$  Hz, 2H), 1.60–1.57 (m, 2H), 2.28 (s, 3H), 2.24–2.17 (m, 2H), 1.82 (quin,  $J = 7.1$  Hz, 2H), 1.60–1.54 (m, 4H), 1.32–1.24 (m, 48H), 0.85 (t,  $J = 7.0$  Hz, 3H);  $^{13}\text{C}$  NMR (75 MHz,  $\text{CDCl}_3$ )  $\delta$  175.4, 138.7, 128.8, 122.3, 100.6, 78.5, 74.8, 71.7, 71.0, 70.5, 69.7, 67.9, 62.4, 51.3, 47.4, 37.1, 32.6, 30.4, 30.3, 30.1, 30.1, 26.6, 23.3, 20.7, 15.9, 14.5; HRMS (FAB+)  $m/z$  calcd for  $\text{C}_{52}\text{H}_{92}\text{N}_3\text{O}_9$   $[\text{M}+\text{H}]^+$ : 902.6834; Found: 902.6827.

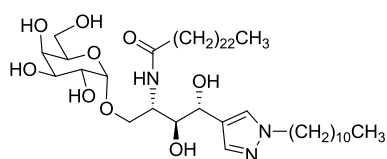

Compound **2a**; 95% yield;  $[\alpha]_D^{25} +49.1$  ( $c = 0.77$ ,  $\text{CHCl}_3/\text{MeOH} = 1:1$ );  $^1\text{H NMR}$  (500 MHz,  $\text{CD}_3\text{OD}$ ; reference peak :  $\text{CD}_3\text{OD}$  at 3.31 ppm)  $\delta$  7.71 (d,  $J = 9.0$  Hz, 1H), 7.50 (s, 1H), 7.49 (s, 1H), 4.89 (d,  $J = 4.0$  Hz, 1H), 4.67 (d,  $J = 5.5$  Hz, 1H), 4.06 (t,  $J = 7.3$  Hz, 2H), 4.02 (m, 1H), 3.88 (d,  $J = 24.5$  Hz, 1H), 3.84–3.75 (m, 4H), 3.74–3.68 (m, 4H), 2.18 (t,  $J = 7.5$  Hz, 2H), 1.84–1.78 (m, 2H), 1.62–1.57 (m, 2H), 1.30–1.12 (m, 56H), 0.87 (t,  $J = 7.0$  Hz, 6H);  $^{13}\text{C NMR}$  (75 MHz,  $\text{CDCl}_3$ )  $\delta$  175.5, 138.8, 129.6, 122.5, 100.8, 75.0, 72.0, 71.2, 70.7, 70.0, 68.1, 62.5, 52.8, 51.6, 50.0, 37.2, 32.8, 31.3, 30.5, 30.4, 30.3, 30.2, 30.1, 27.5, 26.8, 23.5, 14.5.

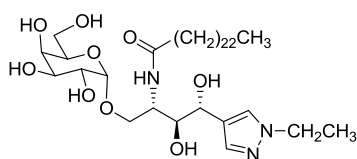

Compound **2b**; 87% yield;  $[\alpha]_D^{25} +41.9$  ( $c = 0.64$ ,  $\text{CHCl}_3/\text{MeOH} = 1:1$ );  $^1\text{H NMR}$  (500 MHz,  $\text{CDCl}_3/\text{CD}_3\text{OD} = 1:1$ ; reference peak :  $\text{CD}_3\text{OD}$  at 3.31 ppm)  $\delta$  7.51 (s, 1H), 7.49 (s, 1H), 4.89 (d,  $J = 4$  Hz, 1H), 4.66 (d,  $J = 6.0$  Hz, 1H), 4.12 (q,  $J = 7.3$  Hz, 2H), 4.05–4.02 (m, 1H), 3.91 (d,  $J = 2.5$  Hz, 1H), 3.84–3.77 (m, 4H), 3.74–3.69 (m, 4H), 2.18 (t,  $J = 7.5$  Hz, 2H), 1.59 (m, 2H), 1.43 (t,  $J = 7.3$  Hz, 3H), 1.29–1.24 (m, 40H), 0.86 (t,  $J = 7.0$  Hz, 3H);  $^{13}\text{C NMR}$  (75 MHz,  $\text{CDCl}_3$ )  $\delta$  175.4, 138.7, 128.8, 122.4, 100.6, 78.5, 74.9, 71.7, 71.0, 70.5, 69.7, 67.9, 62.4, 51.3, 47.4, 37.1, 32.6, 30.4, 30.1, 30.1, 26.6, 23.4, 15.9, 14.5.

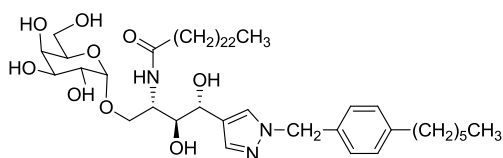

Compound **2c**; 88% yield;  $[\alpha]_D^{25} +48.6$  ( $c = 1.4$ ,  $\text{CHCl}_3/\text{MeOH} = 1:1$ );  $^1\text{H NMR}$  (500 MHz,  $\text{CDCl}_3/\text{CD}_3\text{OD} = 1:1$ ; reference peak :  $\text{CD}_3\text{OD}$  at 3.31 ppm)  $\delta$  7.52 (s, 1H), 7.50 (s, 1H), 7.11 (s, 4H), 5.20 (s, 2H), 4.89 (d,  $J = 4.0$  Hz, 1H), 4.64 (m, 1H), 4.05 (m, 1H), 3.90 (d,  $J = 2.5$  Hz, 1H), 3.84–3.77 (m, 4H), 3.74–3.67 (m, 4H), 2.54 (t,  $J = 7.5$  Hz, 2H), 2.14 (m, 2H), 1.55 (m, 4H), 1.26–1.23 (m, 46H), 0.86–0.84 (m, 6H);  $^{13}\text{C NMR}$  (75 MHz,  $\text{CDCl}_3$ )  $\delta$  175.3, 143.6, 139.0, 134.3, 129.6, 129.4, 128.4, 123.0, 100.5, 74.9, 71.6, 70.9, 70.4, 69.7, 67.8, 62.4, 56.2, 51.2, 37.0, 36.2, 32.6, 32.4, 32.1, 31.1, 30.3, 30.2, 30.1, 30.0, 29.6, 26.6, 23.3, 23.2, 14.5.

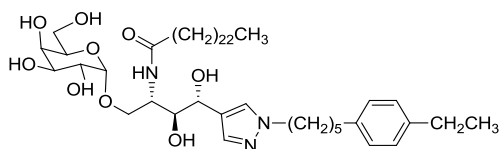

Compound **2d**; 99% yield;  $[\alpha]_D^{25} +42.0$  ( $c = 1.03$ ,  $\text{CHCl}_3/\text{MeOH} = 1:1$ );  $^1\text{H NMR}$  (500 MHz,  $\text{CDCl}_3/\text{CD}_3\text{OD} = 1:1$ ; reference peak :  $\text{CD}_3\text{OD}$  at 3.31 ppm)  $\delta$  7.59 (s, 1H), 7.58 (s, 1H), 7.07–7.03 (m, 4H), 4.89 (d,  $J = 4.0$  Hz, 1H), 4.66 (d,  $J = 5.5$  Hz, 1H), 4.09 (t,  $J = 7.3$  Hz, 2H), 4.02–3.99 (m, 1H), 3.90 (d,  $J = 3.0$  Hz, 1H), 3.84–3.77 (m, 4H), 3.74–3.67 (m, 4H), 2.60–2.53 (m, 4H), 2.18 (dt,  $J = 7.3, 2.0$  Hz, 2H), 1.85 (quin,  $J = 7.5$  Hz, 2H), 1.65–1.57 (m, 4H), 1.35–1.19 (m, 42H), 1.19 (t,  $J = 7.5$  Hz, 3H), 0.85 (t,  $J = 7.0$  Hz, 3H);  $\delta$  175.4, 142.4, 140.1, 138.0, 129.0, 128.4, 122.9, 100.6, 74.8, 71.8, 71.0, 70.5, 69.8, 67.8, 62.4, 52.7, 51.3, 37.1, 35.9, 32.6, 31.8, 30.9, 30.4, 30.1, 30.1, 29.9, 29.1, 26.8, 26.6, 23.4, 16.1, 14.5.

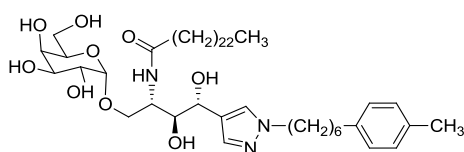

Compound **2e**; 94% yield;  $[\alpha]_D^{25} +50.2$  ( $c = 0.82$ ,  $\text{CHCl}_3/\text{MeOH} = 1:1$ );  $^1\text{H NMR}$  (500 MHz,  $\text{CDCl}_3/\text{CD}_3\text{OD} = 1:1$ ; reference peak :  $\text{CD}_3\text{OD}$  at 3.31 ppm)  $\delta$  7.60 (s, 1H), 7.56 (s, 1H), 7.02 (q,  $J = 7.5$  Hz, 4H), 4.89 (d,  $J = 4.0$  Hz, 1H), 4.66 (m, 1H), 4.07 (t,  $J = 7.3$  Hz, 2H), 4.03–4.00 (m, 1H), 3.90 (d,  $J = 3.0$  Hz, 1H), 3.84–3.76 (m, 4H), 3.74–3.67 (m, 4H), 2.52 (t,  $J = 7.8$  Hz, 2H), 2.27 (s, 3H), 2.18 (t,  $J = 8.0$  Hz, 2H), 1.81 (quin,  $J = 6.5$  Hz, 2H), 1.60–1.54 (m, 4H), 1.32–1.24 (m, 44H), 0.86 (t,  $J = 7.0$  Hz, 3H).

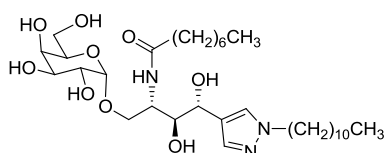

Compound **3a**; 93% yield;  $[\alpha]_D^{25} +58.0$  ( $c = 0.79$ ,  $\text{CHCl}_3/\text{MeOH} = 1:1$ );  $^1\text{H NMR}$  (500 MHz,  $\text{CDCl}_3/\text{CD}_3\text{OD} = 1:1$ ; reference peak :  $\text{CD}_3\text{OD}$  at 3.31 ppm)  $\delta$  7.54 (d,  $J = 9.0$  Hz, 1H), 7.47 (s, 1H), 7.47 (s, 1H), 4.89 (d,  $J = 4.0$  Hz, 1H), 4.65 (d,  $J = 6.0$  Hz, 1H), 4.09–4.02 (m, 1H), 4.03 (t,  $J = 7.5$  Hz, 2H), 3.91 (d,  $J = 3.0$  Hz, 1H), 3.84–3.77 (m, 4H), 3.74–3.67 (m, 4H), 2.16 (dt,  $J = 7.5, 2.5$  Hz, 2H), 1.82–1.76 (m, 2H), 1.60–1.55 (m, 2H), 1.29–1.23 (m, 24H), 0.86–0.83 (m, 6H);  $^{13}\text{C NMR}$  (75 MHz,  $\text{CDCl}_3$ )  $\delta$  175.2, 138.4, 129.1, 122.2, 100.4, 74.9, 71.5, 70.8, 70.3, 69.6, 67.8, 62.3, 52.7, 51.1, 36.9, 32.5, 32.3, 31.0, 30.2, 30.1, 29.9, 29.8, 29.6, 27.2, 26.4, 23.2, 23.2, 14.4, 14.4.







(d,  $J = 5.5$  Hz, 2H), 7.21 (t,  $J = 6.8$  Hz, 2H), 7.14–7.10 (m, 3H), 7.07–7.02 (m, 4H), 4.89 (d,  $J = 4.0$  Hz, 1H), 4.64 (d,  $J = 3.5$  Hz, 1H), 4.07–4.02 (m, 3H), 3.90 (d,  $J = 3.0$  Hz, 1H), 3.84–3.77 (m, 4H), 3.73–3.68 (m, 4H), 2.60–2.52 (m, 6H), 2.18 (dt,  $J = 7.5, 2.5$  Hz, 2H), 1.83 (quin,  $J = 7.5$  Hz, 2H), 1.65–1.57 (m, 6H), 1.38–1.28 (m, 4H), 1.18 (t,  $J = 7.8$  Hz, 3H).

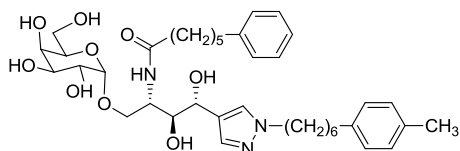

Compound **4e**; 97% yield;  $[\alpha]_{\text{D}}^{25} +52.5$  ( $c = 0.45$ ,  $\text{CHCl}_3/\text{MeOH} = 1:1$ );  $^1\text{H NMR}$  (500 MHz,  $\text{CDCl}_3/\text{CD}_3\text{OD} = 1:1$ ; reference peak :  $\text{CD}_3\text{OD}$  at 3.31 ppm)  $\delta$  7.49 (s, 1H), 7.49 (s, 1H), 7.23–7.20 (m, 2H), 7.14–7.01 (m, 3H), 7.03–6.99 (m, 4H), 4.88 (d,  $J = 4.0$  Hz, 1H), 4.65 (d,  $J = 5.0$  Hz, 1H), 4.07–4.00 (m, 3H), 3.89 (d,  $J = 3.0$  Hz, 1H), 3.84–3.3.76 (m, 4H), 3.74–3.66 (m, 4H), 2.59 (t,  $J = 7.5$  Hz, 2H), 2.51 (t,  $J = 7.8$  Hz, 2H), 2.26 (s, 3H), 2.18 (dt,  $J = 7.5, 1.8$  Hz, 2H), 1.80 (quin,  $J = 6.0$  Hz, 2H), 1.66–1.60 (m, 4H), 1.59–1.53 (m, 2H), 1.38–1.25 (m, 8H).

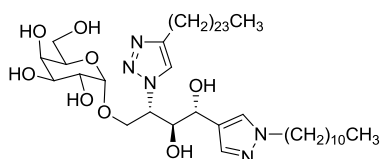

Compound **5a**; 59% yield;  $[\alpha]_{\text{D}}^{25} +32.5$  ( $c = 0.65$ ,  $\text{CHCl}_3/\text{MeOH} = 1:1$ );  $^1\text{H NMR}$  (500 MHz,  $\text{CDCl}_3/\text{CD}_3\text{OD} = 1:1$ ; reference peak :  $\text{CD}_3\text{OD}$  at 3.31 ppm)  $\delta$  8.12 (s, 1H), 7.64 (s, 1H), 7.58 (s, 1H), 5.08 (m, 1H), 5.09–5.06 (m, 1H), 4.86 (d,  $J = 3.5$  Hz, 1H), 4.52 (d,  $J = 6.5$  Hz, 1H), 4.30–4.27 (m, 1H), 4.16–4.09 (m, 4H), 3.87 (d,  $J = 3.0$  Hz, 1H), 3.79–3.73 (m, 1H), 3.73–3.62 (m, 4H), 2.75 (t,  $J = 7.8$  Hz, 2H), 1.85–1.79 (m, 2H), 1.71–1.65 (m, 2H), 1.39–1.23 (m, 58H), 0.87–0.83 (m, 6H).

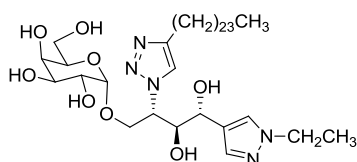

Compound **5b**; 88% yield;  $[\alpha]_{\text{D}}^{25} +39.8$  ( $c = 0.29$ ,  $\text{CHCl}_3/\text{MeOH} = 1:1$ );  $^1\text{H NMR}$  (500 MHz,  $\text{CDCl}_3/\text{CD}_3\text{OD} = 1:1$ ; reference peak :  $\text{CD}_3\text{OD}$  at 3.31 ppm)  $\delta$  8.11 (s, 1H), 7.65 (s, 1H), 7.59 (s, 1H), 5.10–5.06 (m, 1H), 4.86 (d,  $J = 4.0$  Hz, 1H), 4.52 (d,  $J = 6.5$  Hz, 1H), 4.30–4.27 (m,

1H), 4.21–4.08 (m, 4H), 3.87 (d,  $J = 3$  Hz, 1H), 3.79–3.62 (m, 5H), 2.74 (t,  $J = 7.8$  Hz, 2H), 1.70–1.65 (m, 2H), 1.46 (t,  $J = 3.5$  Hz, 3H), 1.35–1.22 (m, 42H), 0.85 (t,  $J = 6.8$  Hz, 3H).

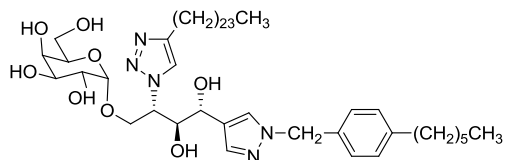

Compound **5c**; 79% yield;  $[\alpha]_D^{25} +41.2$  ( $c = 0.60$ ,  $\text{CHCl}_3/\text{MeOH} = 1:1$ );  $^1\text{H NMR}$  (500 MHz,  $\text{CDCl}_3/\text{CD}_3\text{OD} = 1:1$ ; reference peak :  $\text{CD}_3\text{OD}$  at 3.31 ppm)  $\delta$  8.08 (s, 1H), 7.98 (s, 1H), 7.58 (s, 1H), 7.55 (s, 1H), 7.15–7.09 (m, 3H), 5.24 (s, 2H), 5.08 (m, 1H), 4.85 (d,  $J = 3.5$  Hz, 1H), 4.52 (d,  $J = 7.0$  Hz, 1H), 4.31–4.26 (m, 1H), 4.15–4.08 (m, 2H), 3.88–3.86 (m, 1H), 3.81–3.62 (m 5H), 2.75–2.71 (m, 2H), 2.53 (t,  $J = 7.8$  Hz, 2H), 1.69–1.63 (m 2H), 1.57–1.51 (m, 2H), 1.36–1.18 (m 48H), 0.86–0.83 (m, 3H).

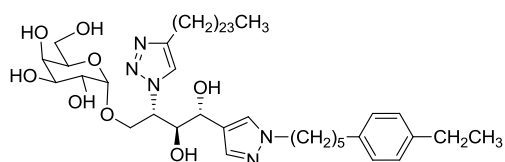

Compound **5d**; 88% yield;  $[\alpha]_D^{25} +41.1$  ( $c = 1.0$ ,  $\text{CHCl}_3/\text{MeOH} = 1:1$ );  $^1\text{H NMR}$  (500 MHz,  $\text{CDCl}_3/\text{CD}_3\text{OD} = 1:1$ ; reference peak :  $\text{CD}_3\text{OD}$  at 3.31 ppm)  $\delta$  7.83 (s, 1H), 7.49 (s, 1H), 7.47 (s, 1H), 7.07–7.02 (m, 4H), 4.91 (m, 1H), 4.85 (d,  $J = 4.0$  Hz, 1H), 4.43 (d,  $J = 6.0$  Hz, 1H), 4.22–4.17 (m, 2H), 4.08–4.05 (m, 3H), 3.86 (d,  $J = 3.0$  Hz, 1H), 3.77 (dd,  $J = 10.0, 4.0$  Hz, 1H), 3.71–3.63 (m, 3H), 3.60–3.57 (m, 1H), 2.69 (t,  $J = 7.8$  Hz, 2H), 2.59–2.52 (m, 4H), 1.83 (quin,  $J = 7.5$  Hz, 2H), 1.66–1.58 (m, 4H), 1.36–1.21 (m, 44H), 1.18 (t,  $J = 7.5$  Hz, 3H), 0.86 (t,  $J = 7.0$  Hz, 3H).

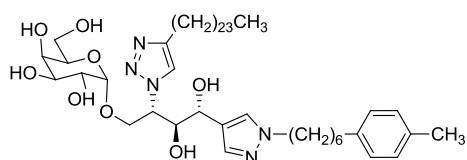

Compound **5e**; 93% yield;  $[\alpha]_D^{25} +42.0$  ( $c = 0.40$ ,  $\text{CHCl}_3/\text{MeOH} = 1:1$ );  $^1\text{H NMR}$  (500 MHz,  $\text{CDCl}_3/\text{CD}_3\text{OD} = 1:1$ ; reference peak :  $\text{CD}_3\text{OD}$  at 3.31 ppm)  $\delta$  7.71 (s, 1H), 7.45 (s, 1H), 7.44 (s, 1H), 7.02 (q,  $J = 7.5$  Hz, 4H), 4.85–4.82 (m, 2H), 4.39 (d,  $J = 5.0$  Hz, 1H), 4.22–4.16 (m, 2H), 4.05–4.02 (m, 3H), 3.86 (d,  $J = 3.0$  Hz, 1H), 3.77 (dd,  $J = 10.0, 4.0$  Hz, 1H), 3.70–3.62 (m, 3H), 3.58–3.55 (m, 1H), 2.66 (t,  $J = 7.5$  Hz, 2H), 2.52 (t,  $J = 7.5$  Hz, 2H), 2.26 (s, 3H),



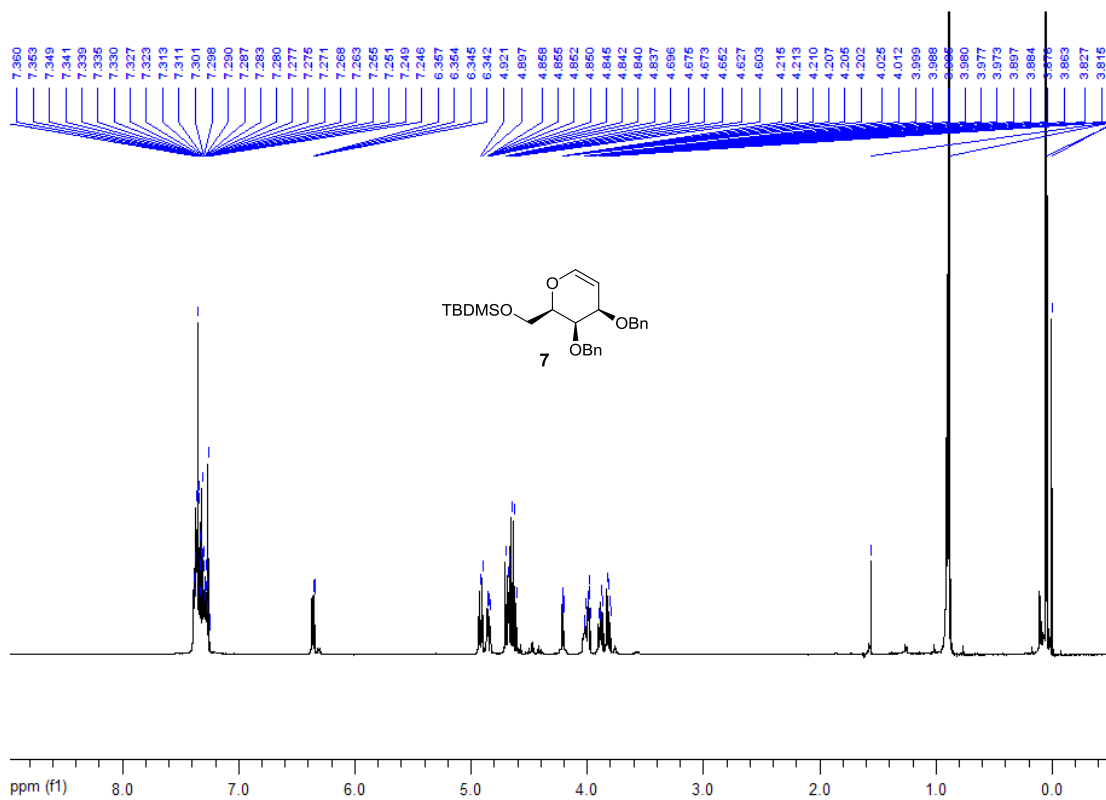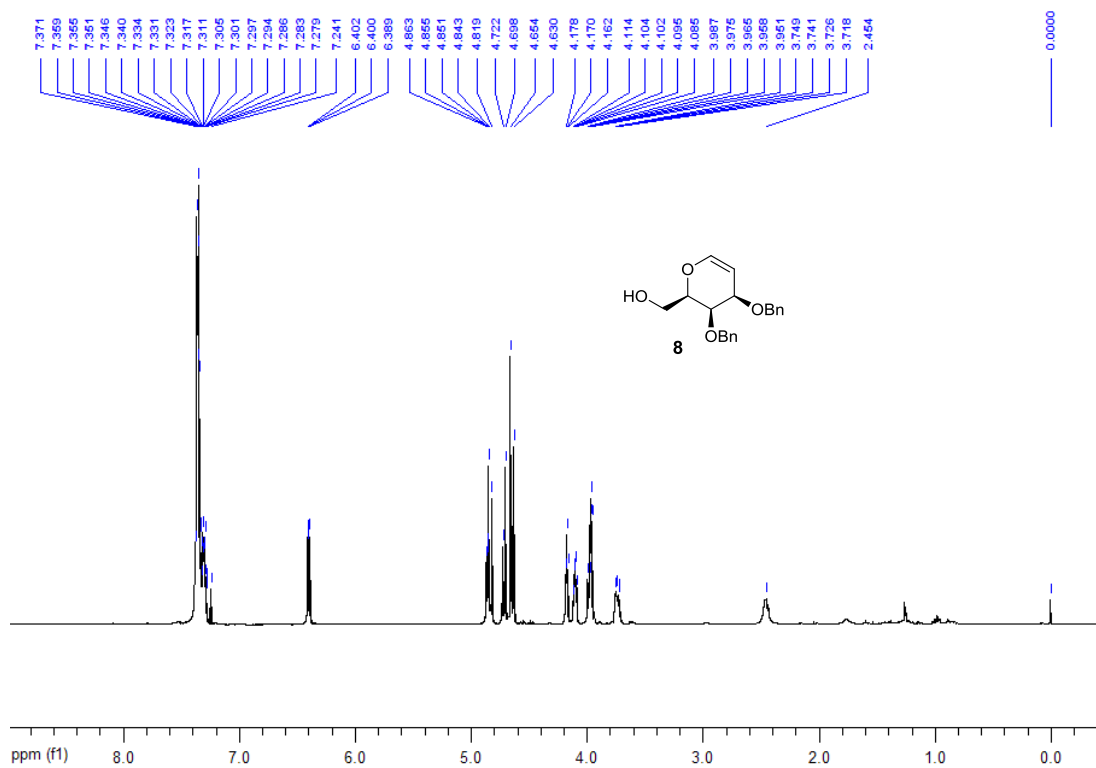

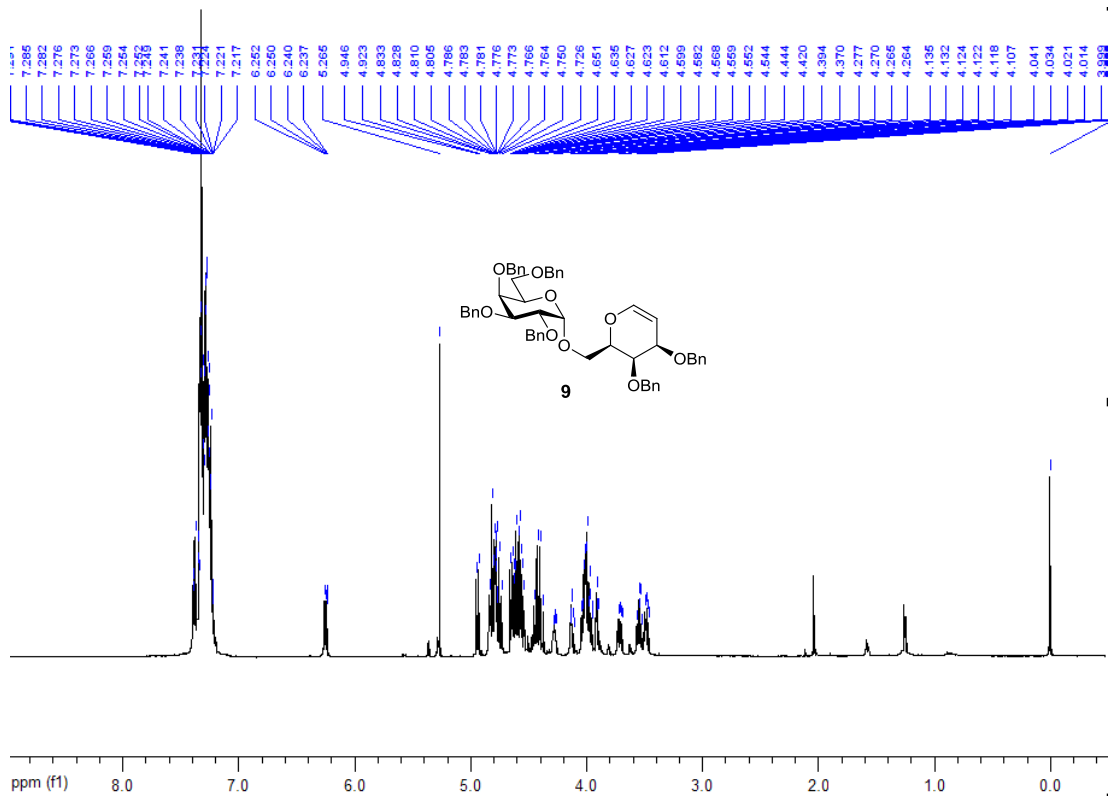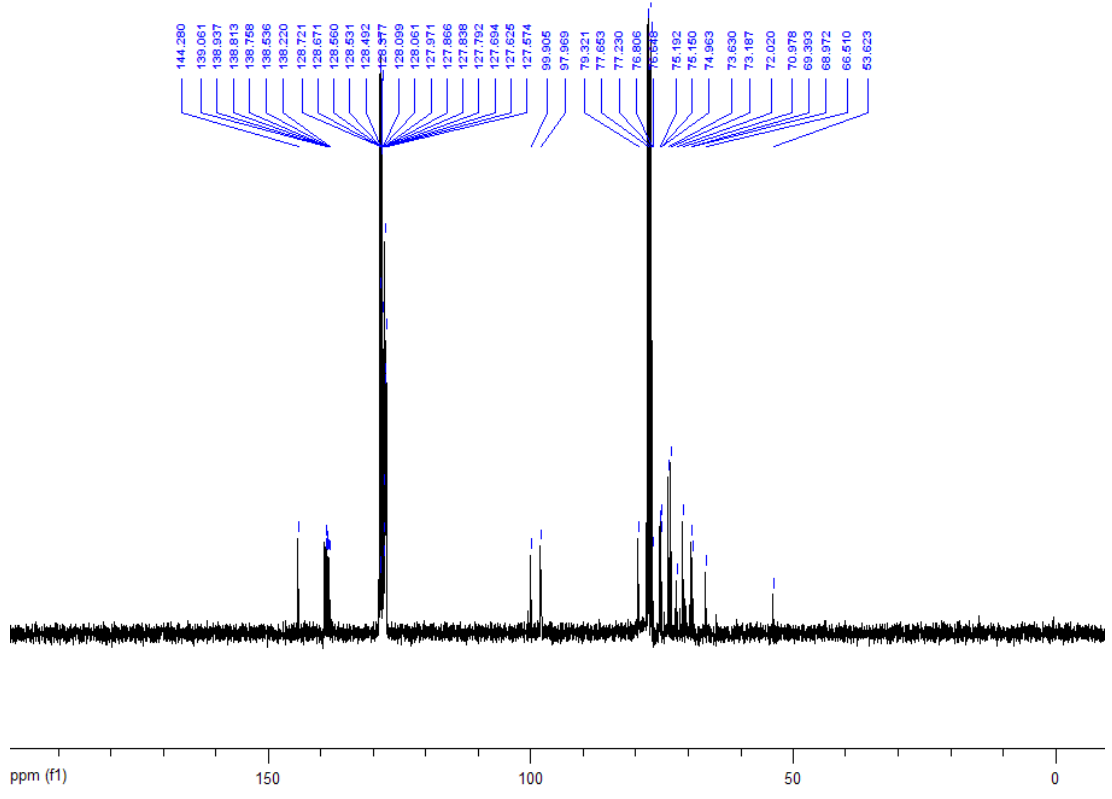

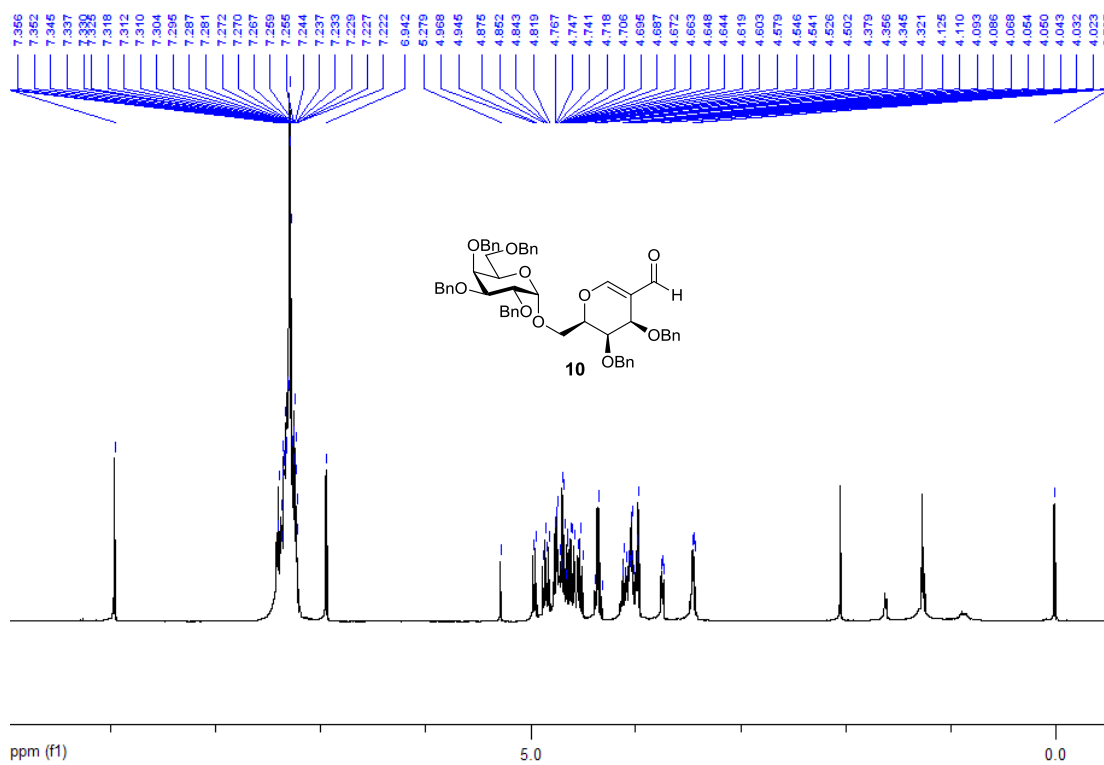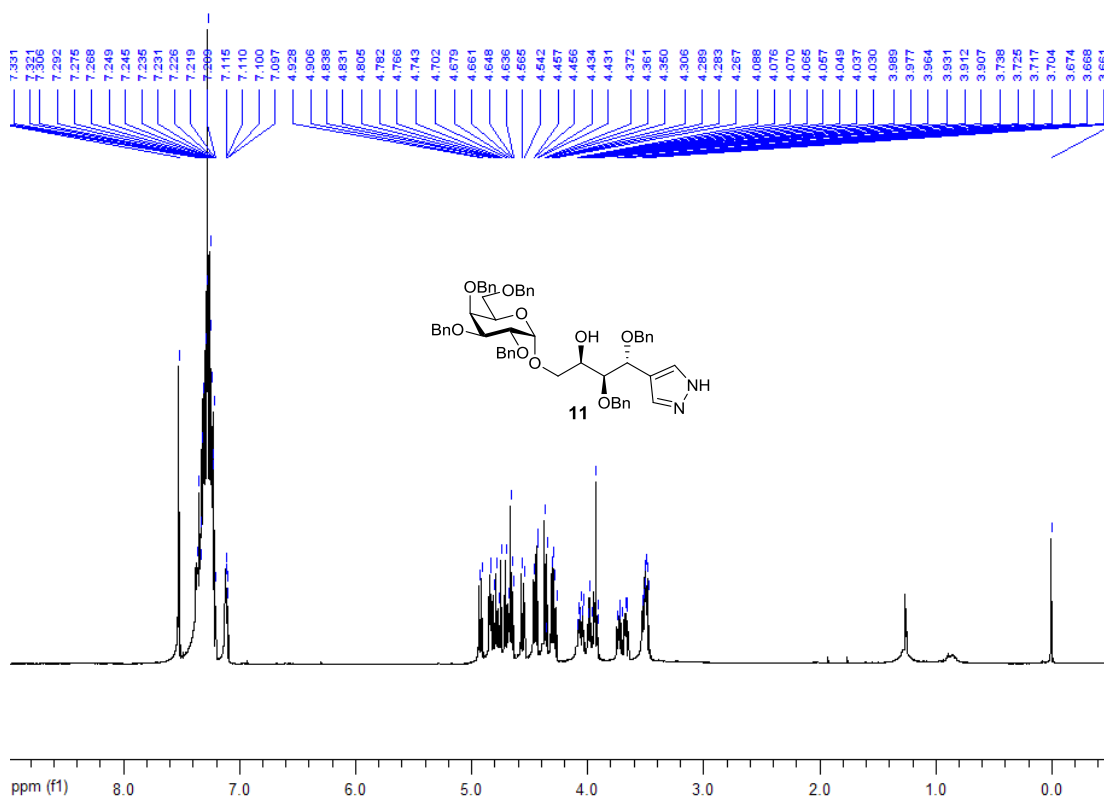



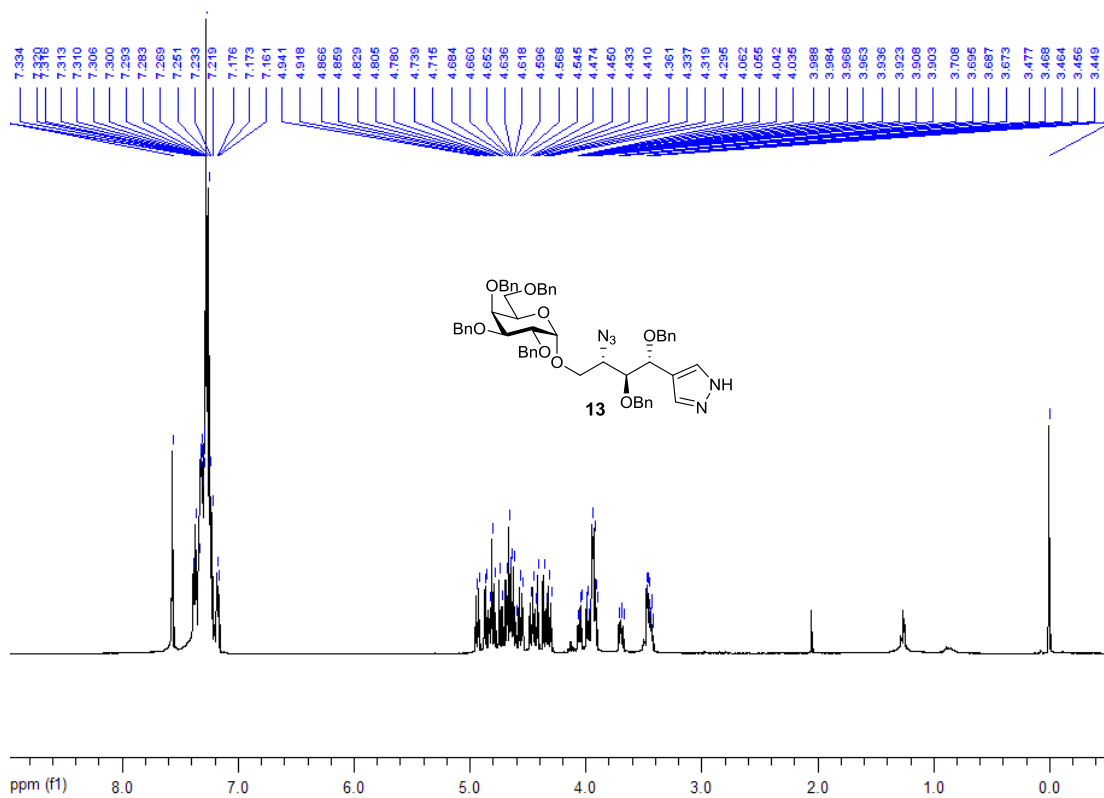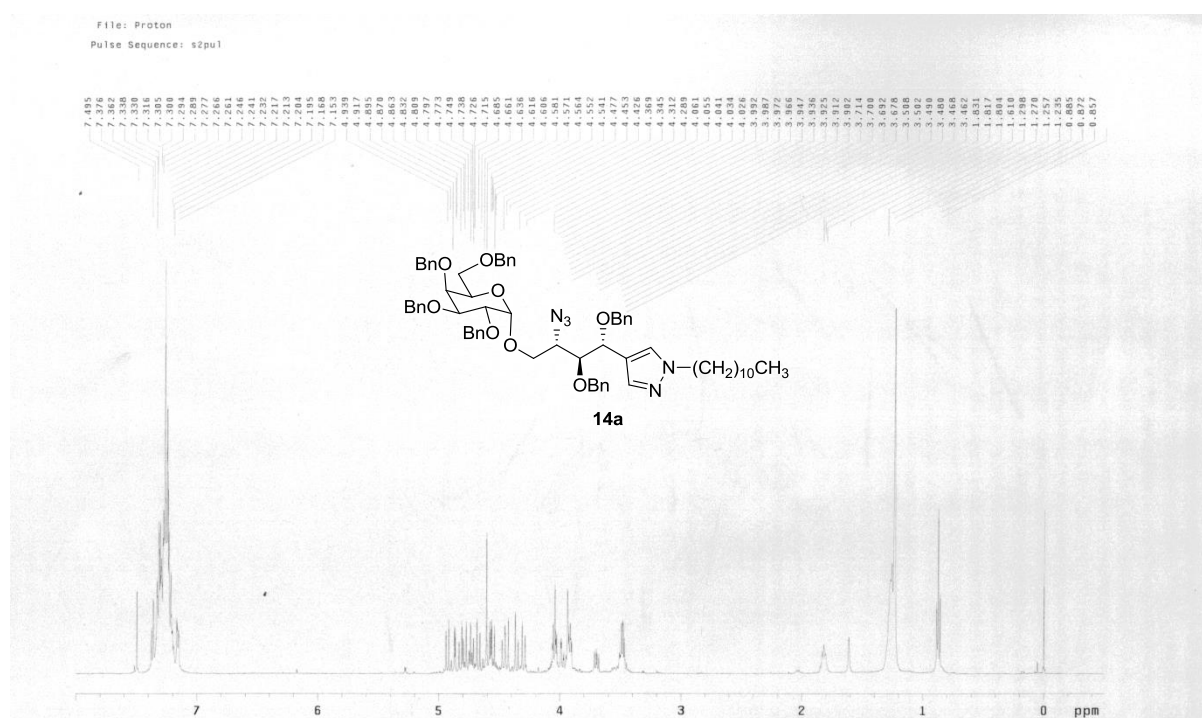

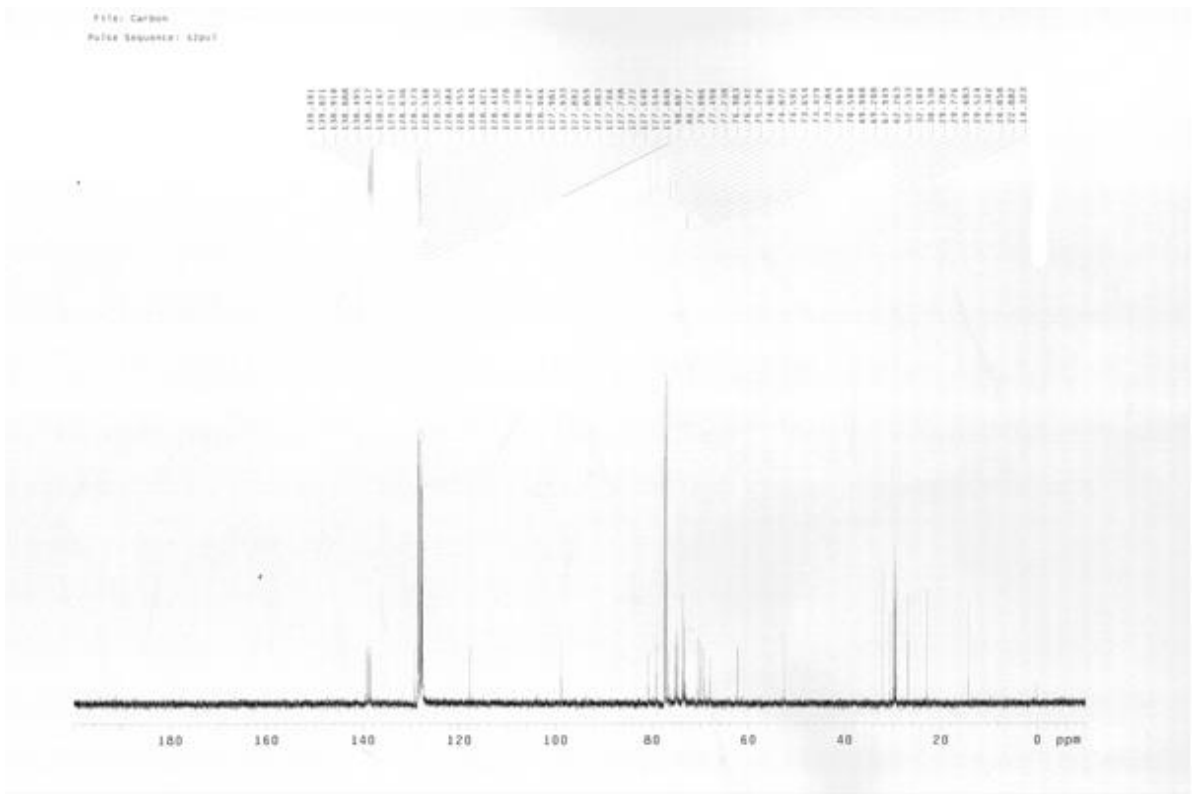





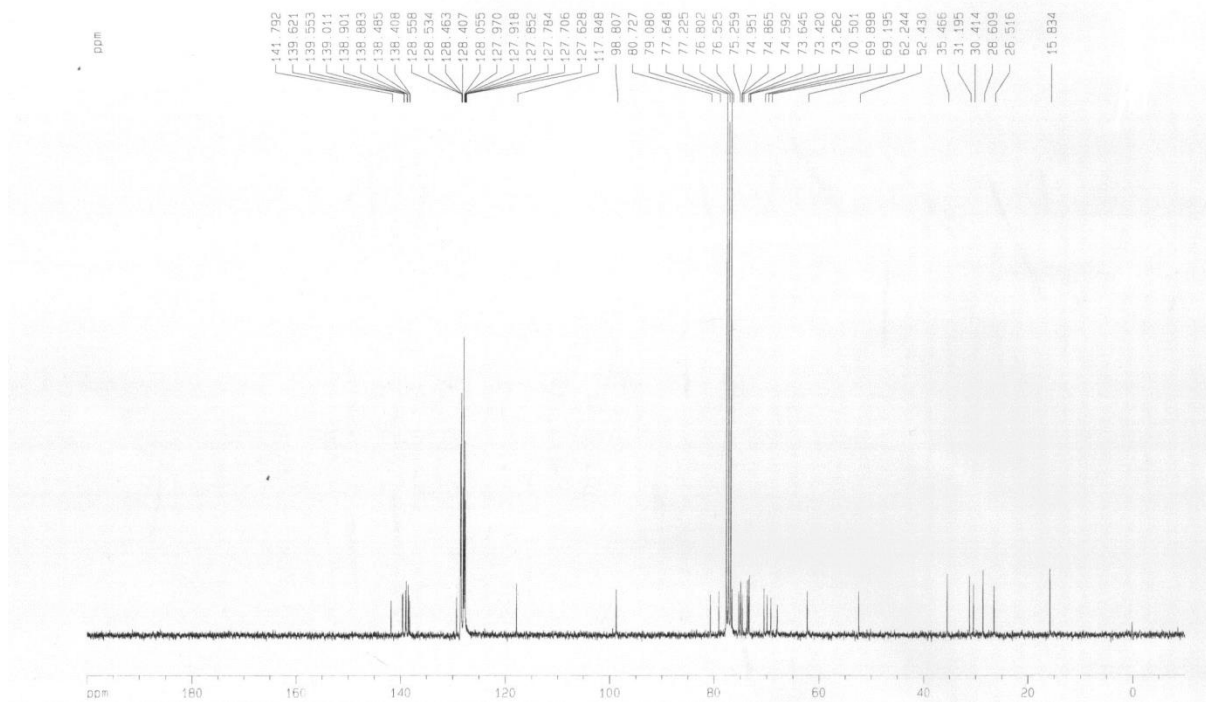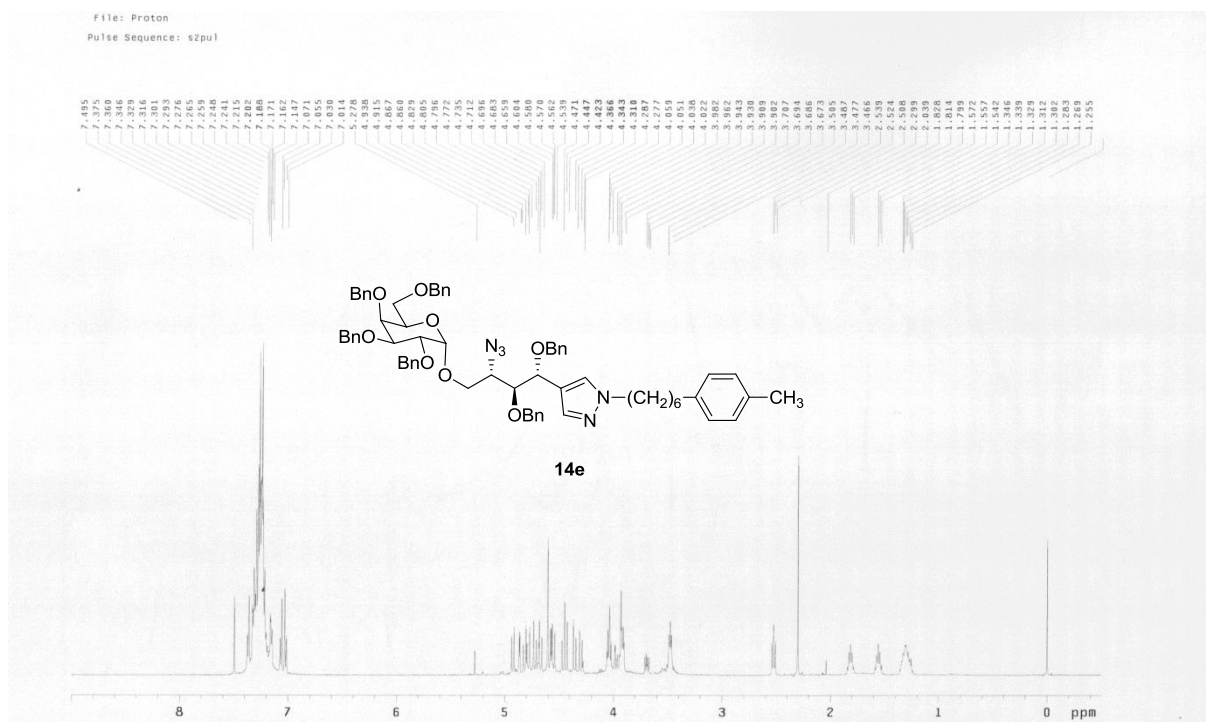

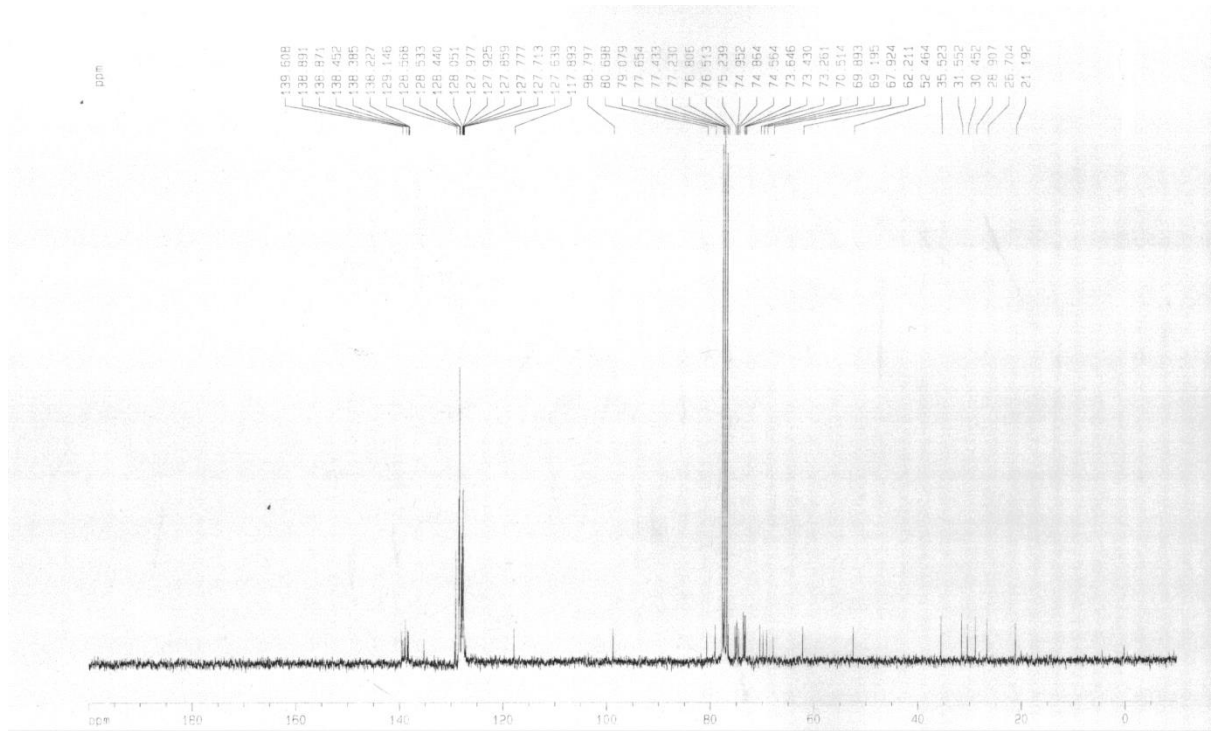

File: Proton  
Pulse Sequence: s2pul

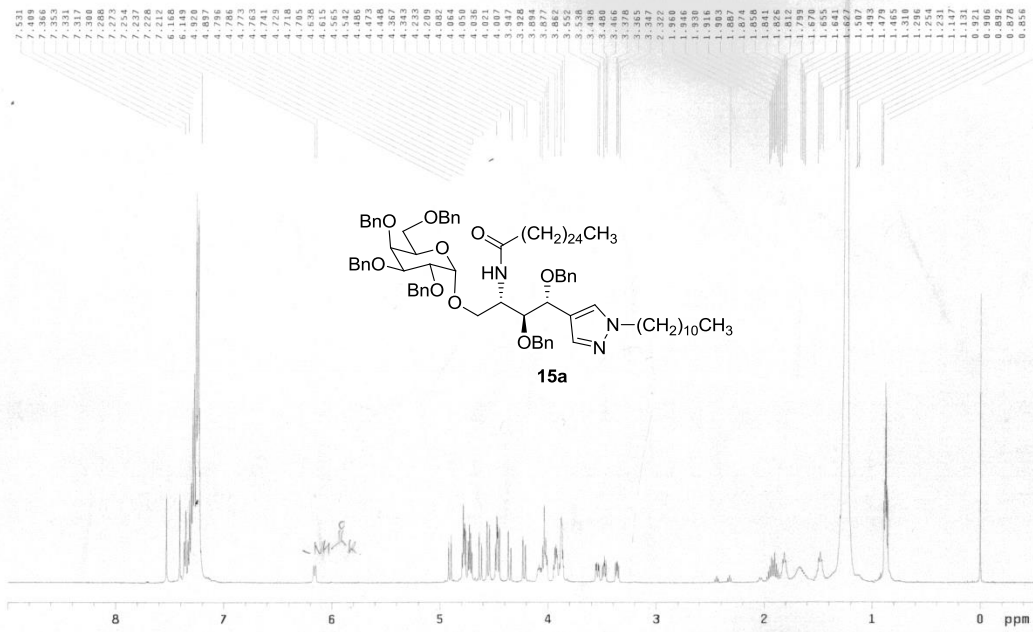

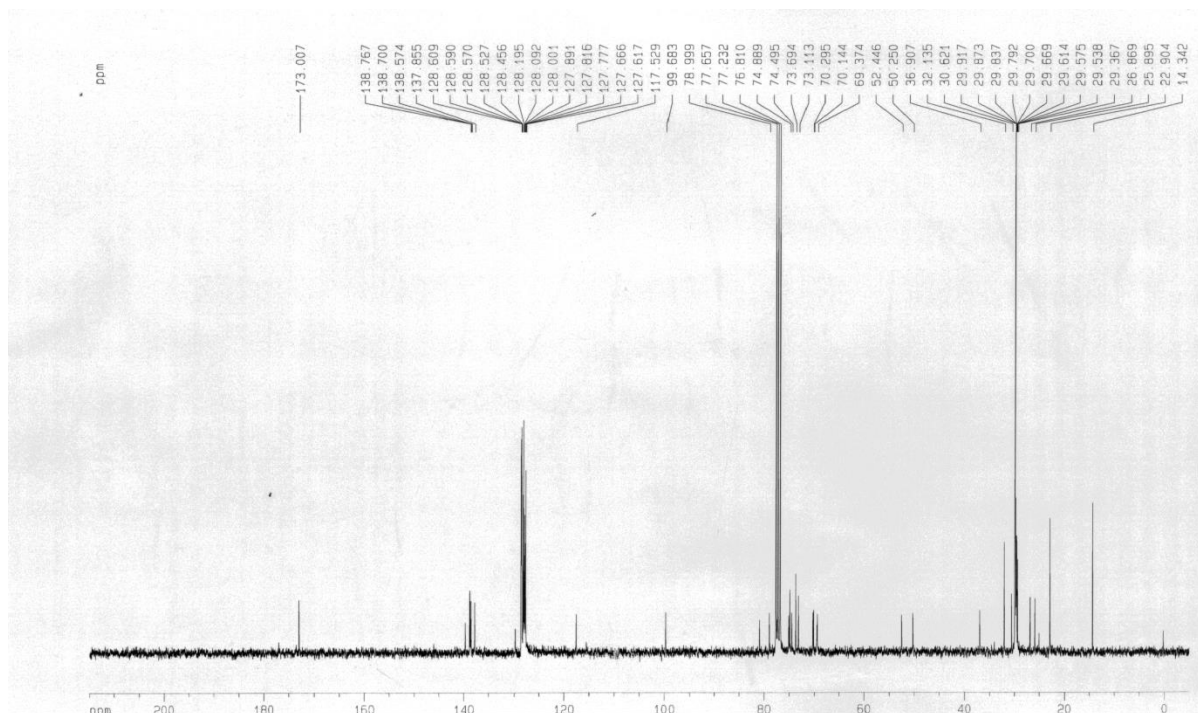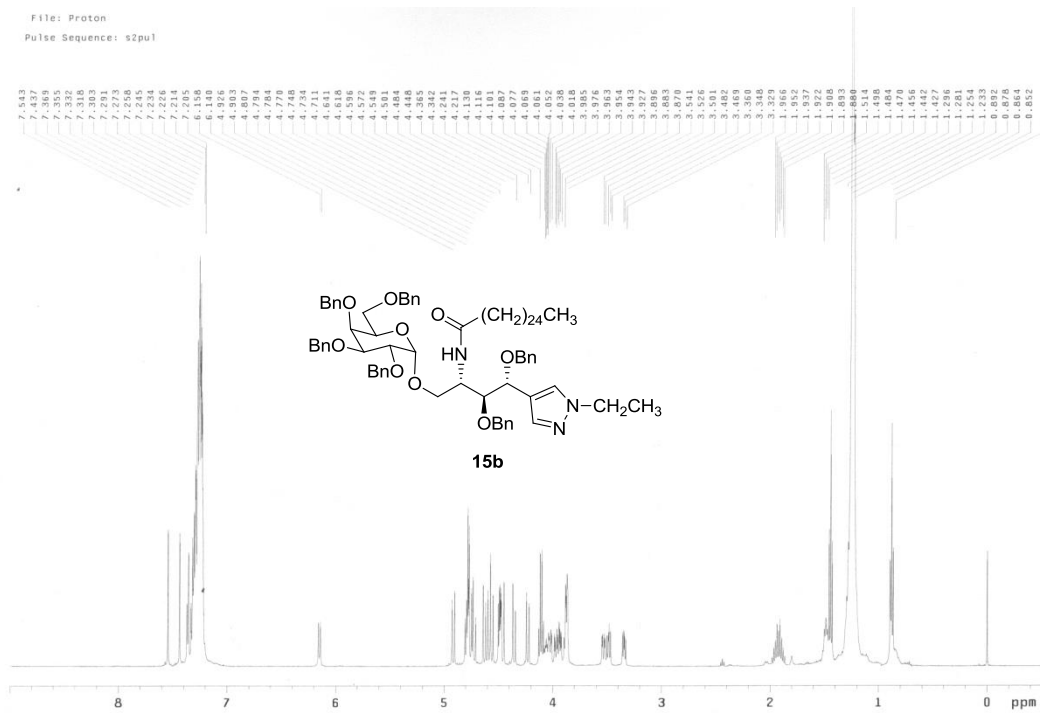

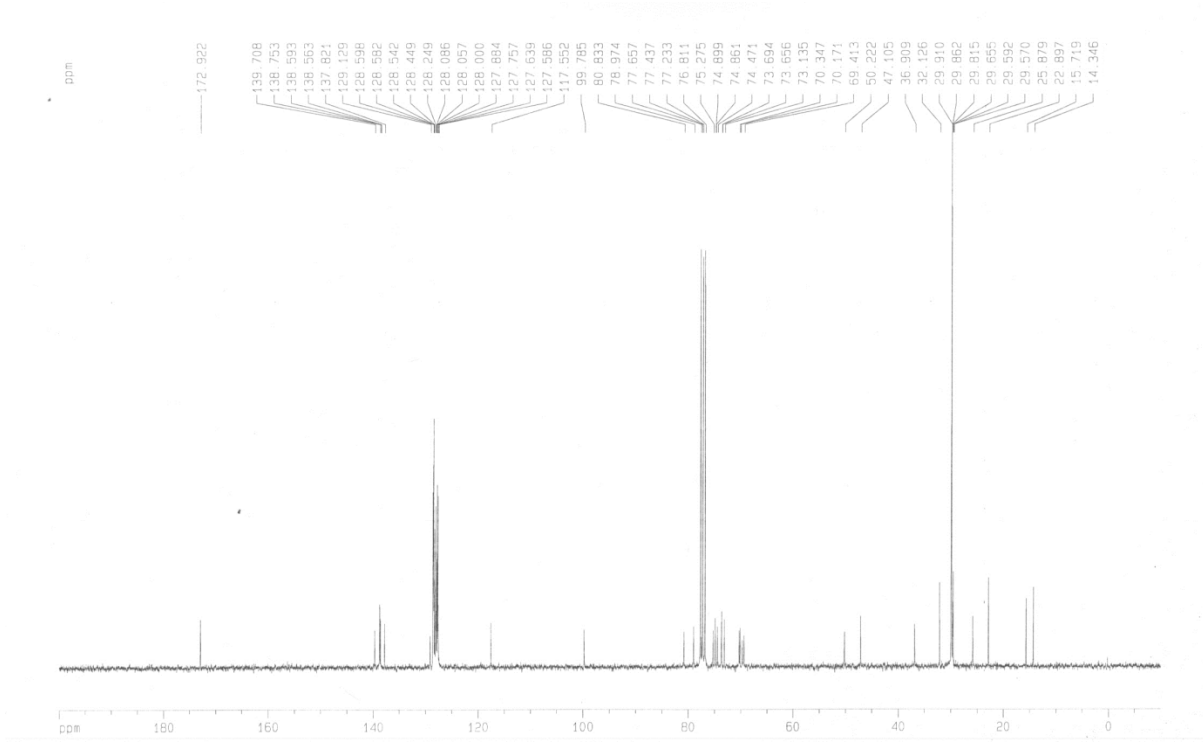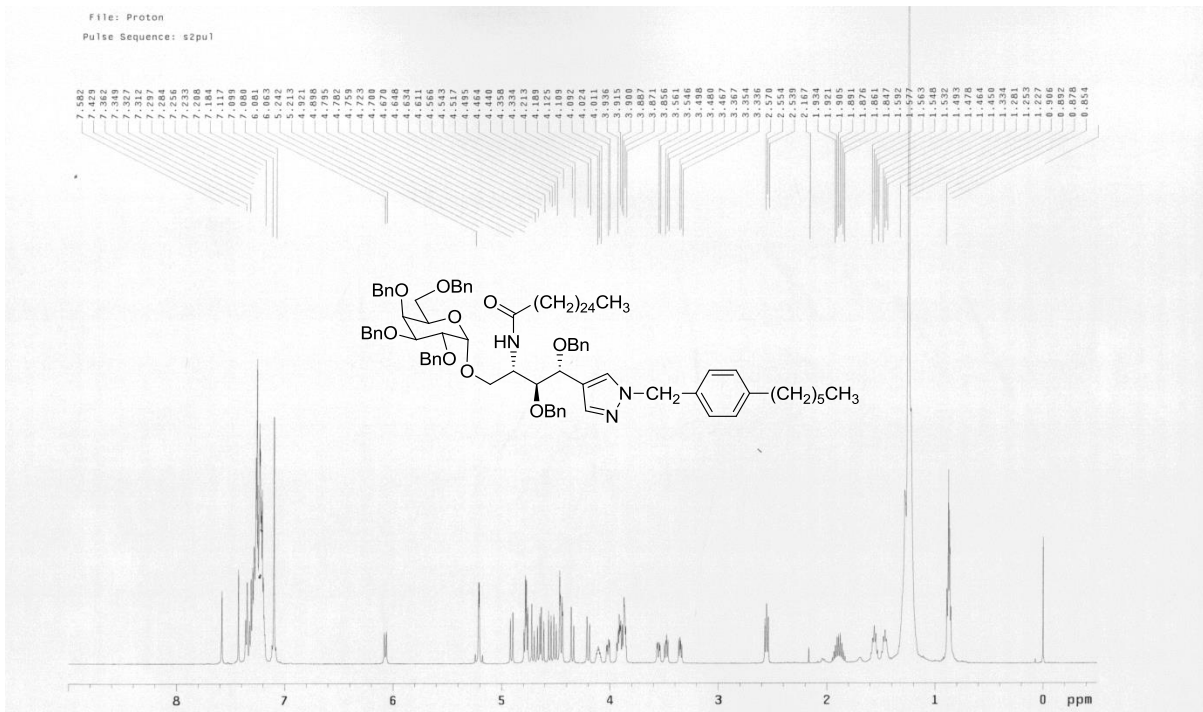





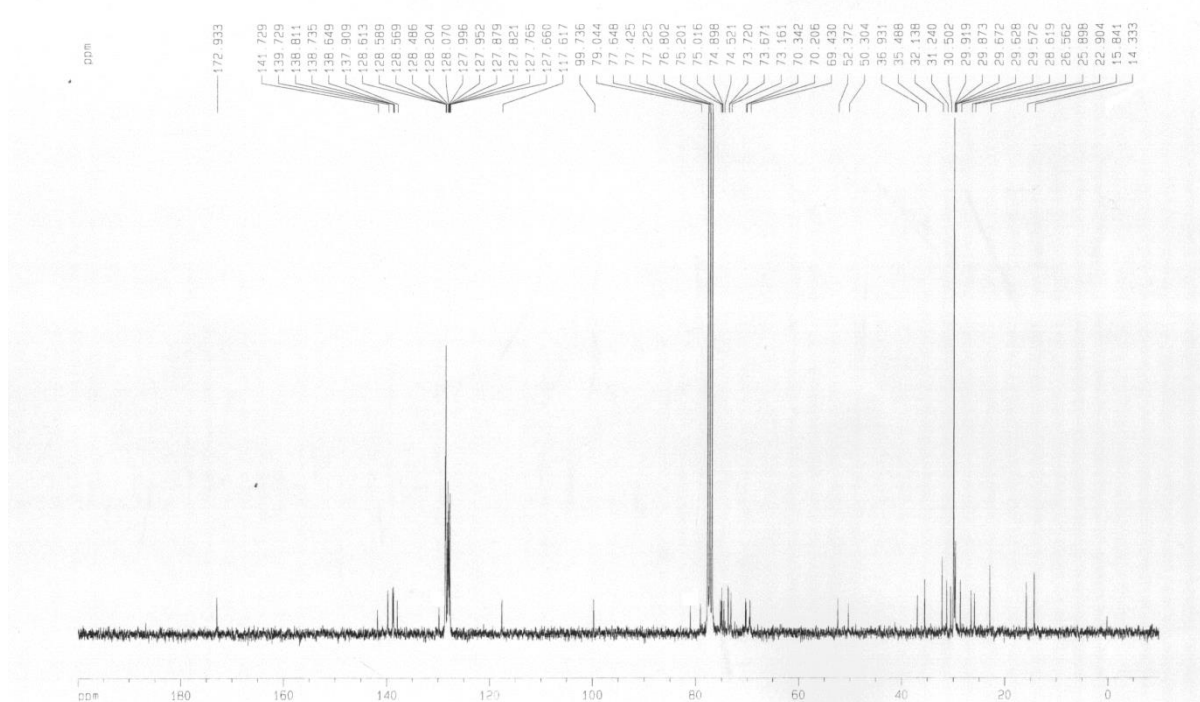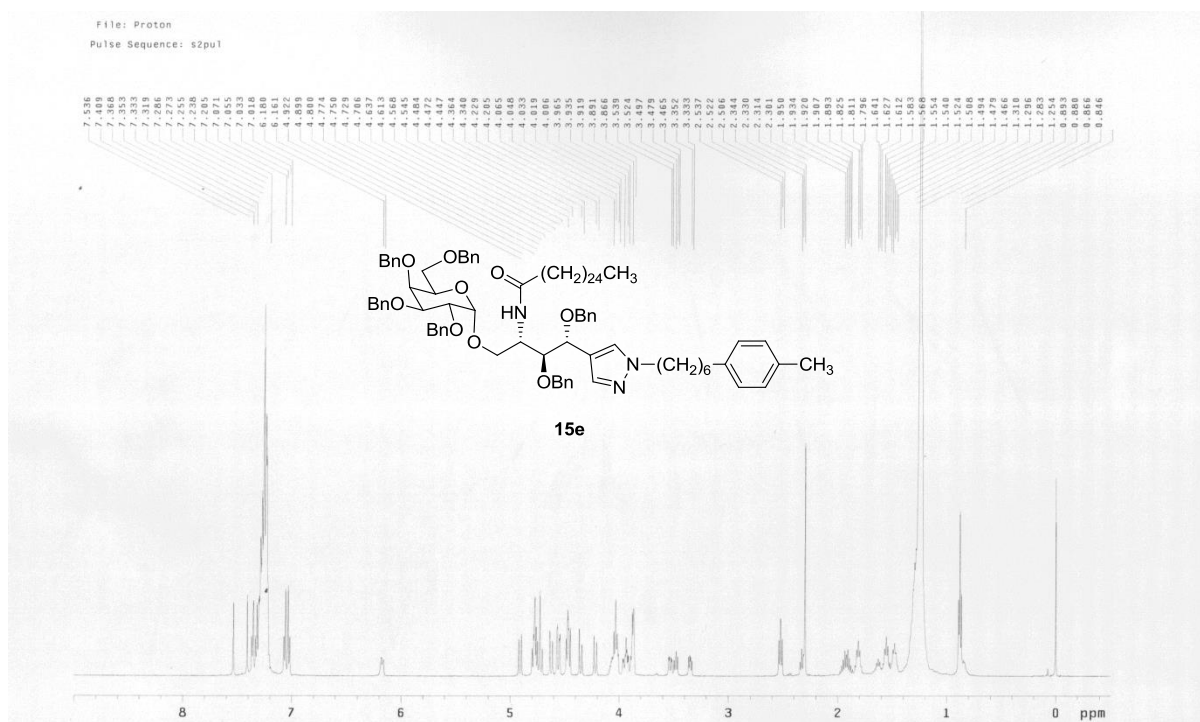

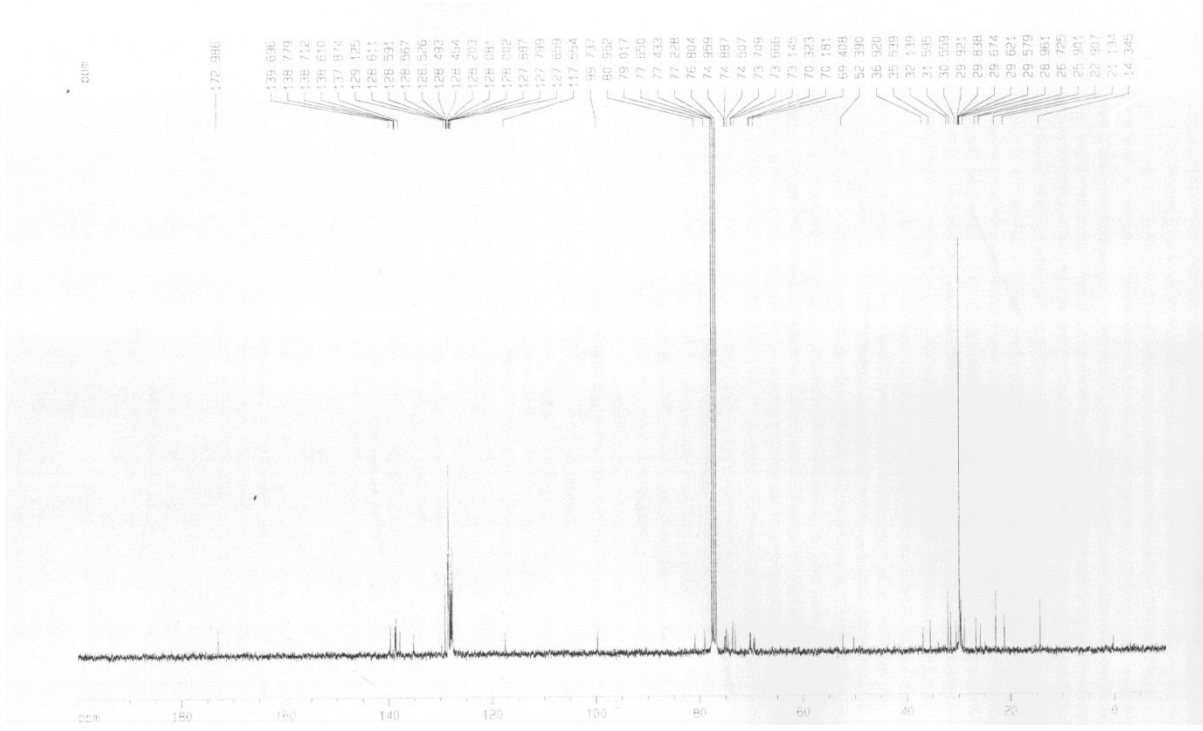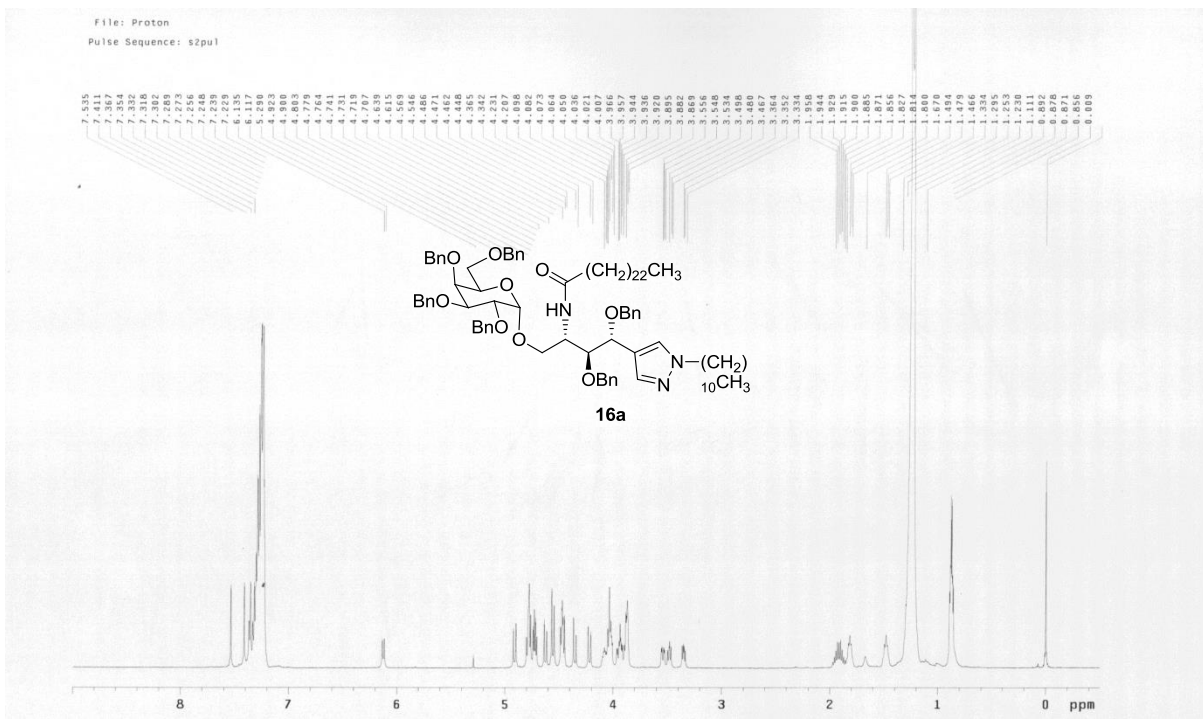



File: Proton  
Pulse Sequence: s2pu1

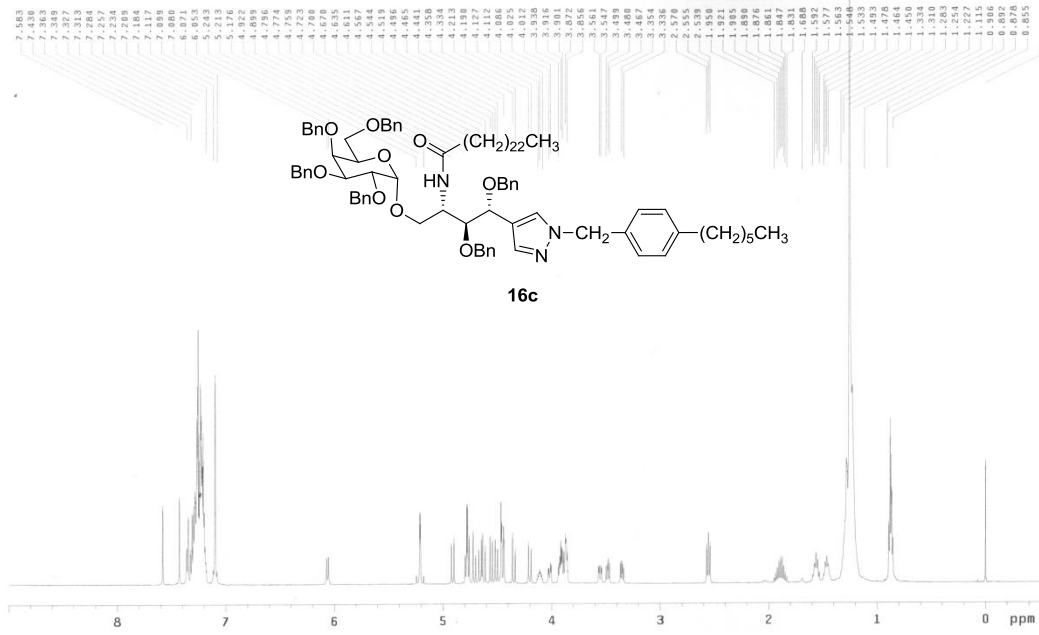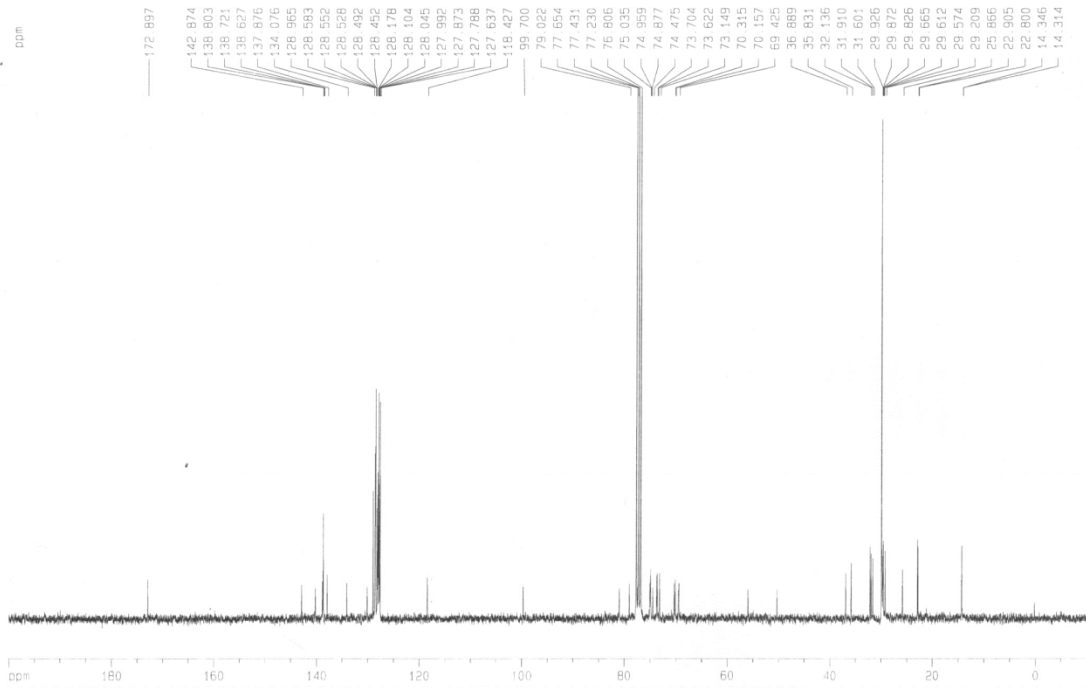

File: VI-103\_desired\_product-1  
Pulse Sequence: s2pu1

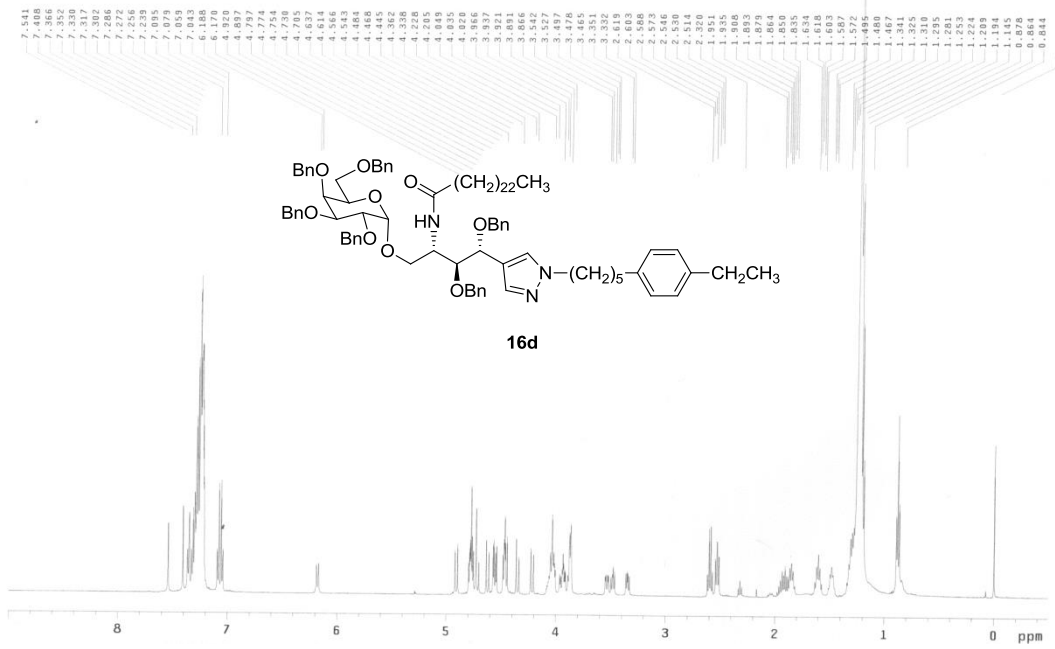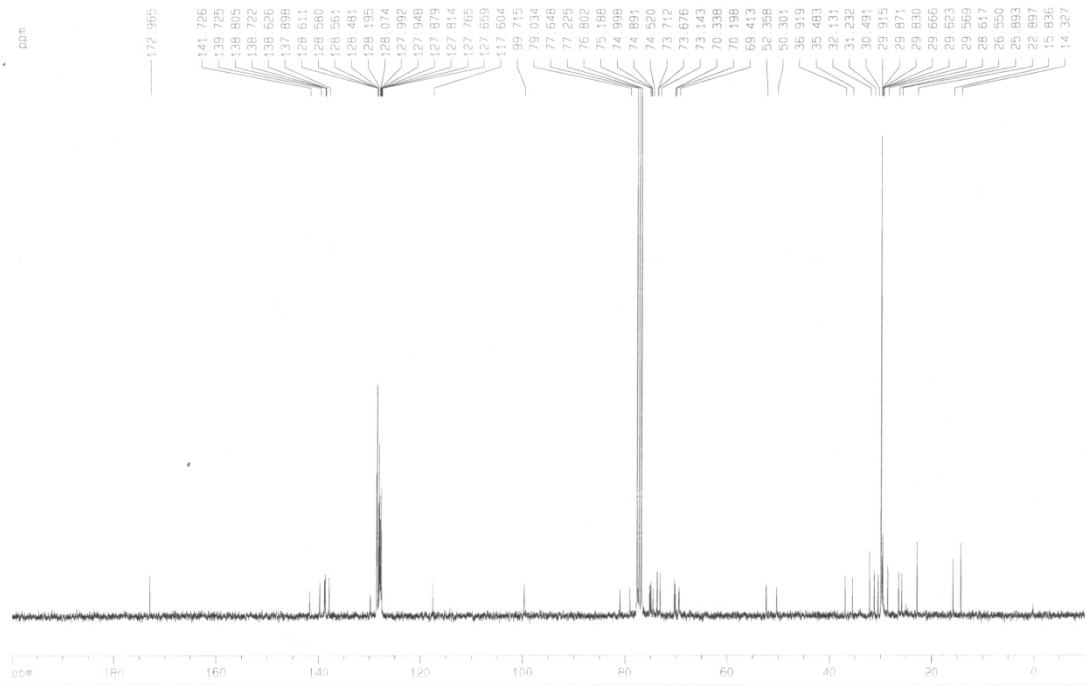



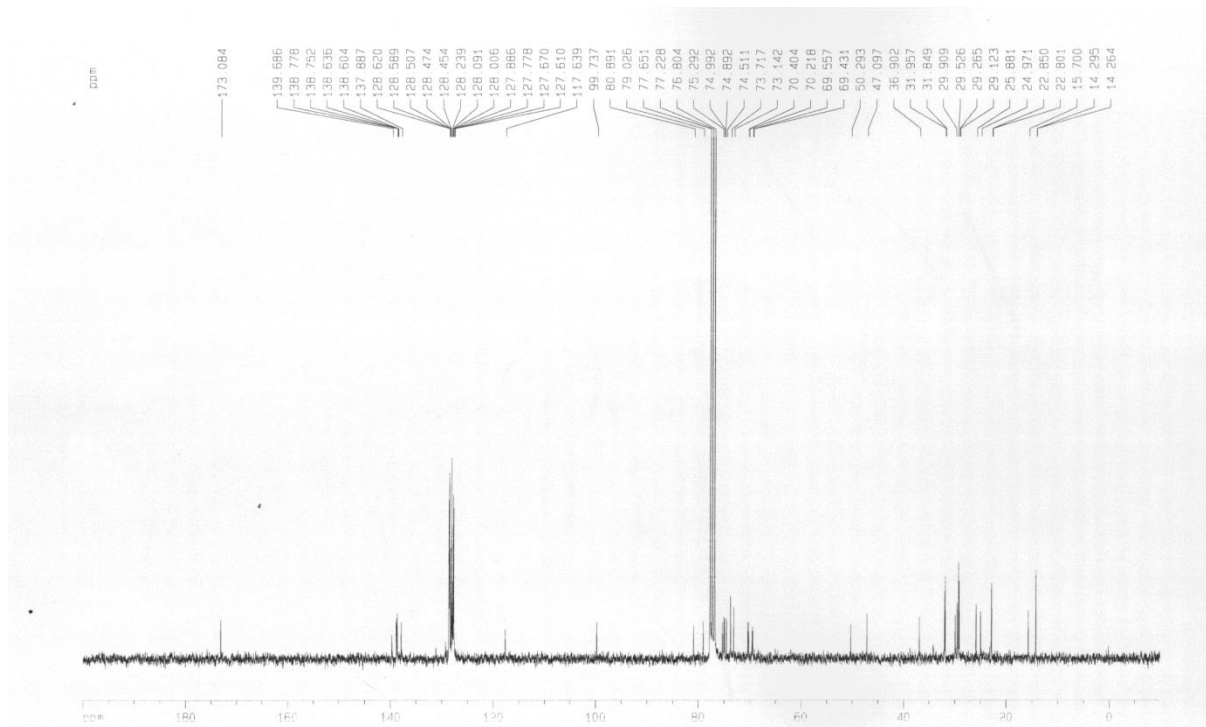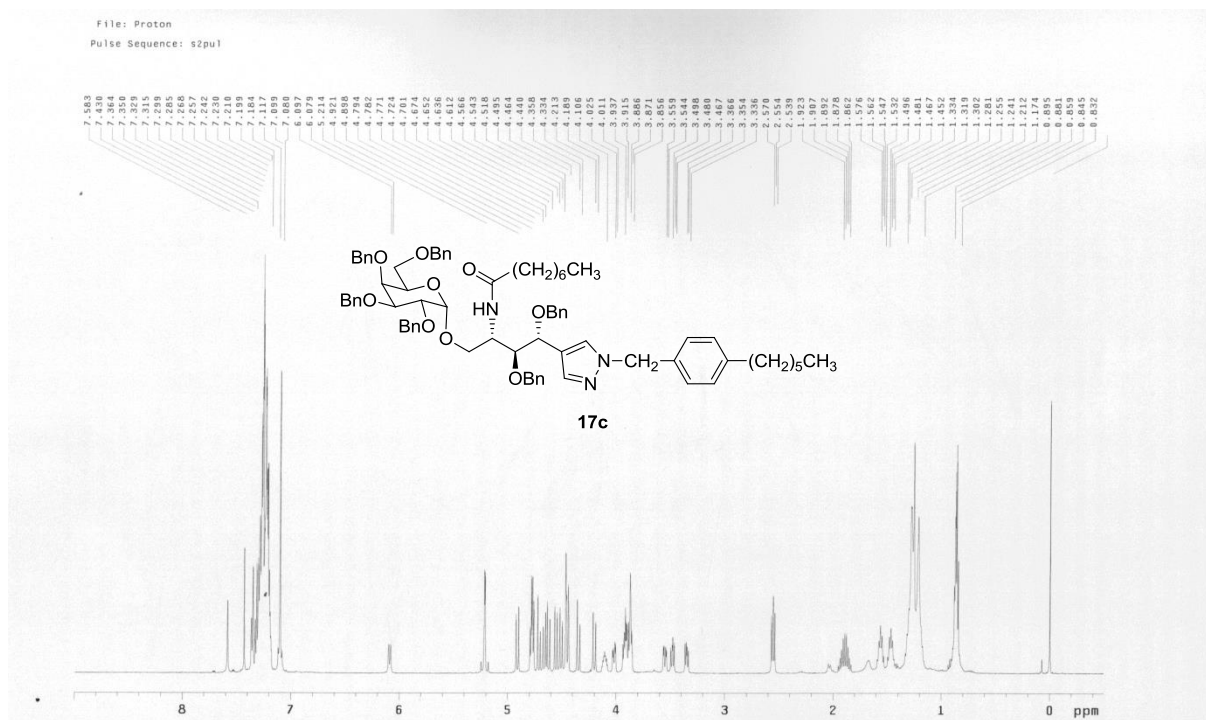



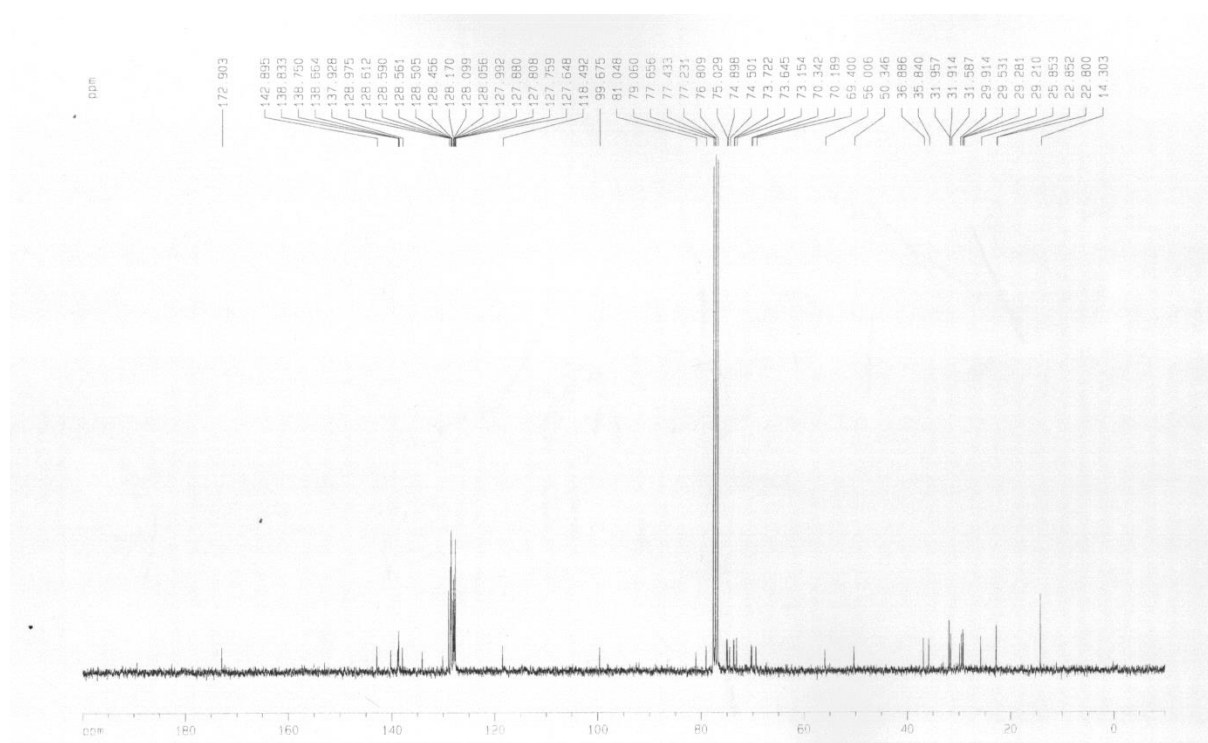

File: Proton  
Pulse Sequence: s2pul

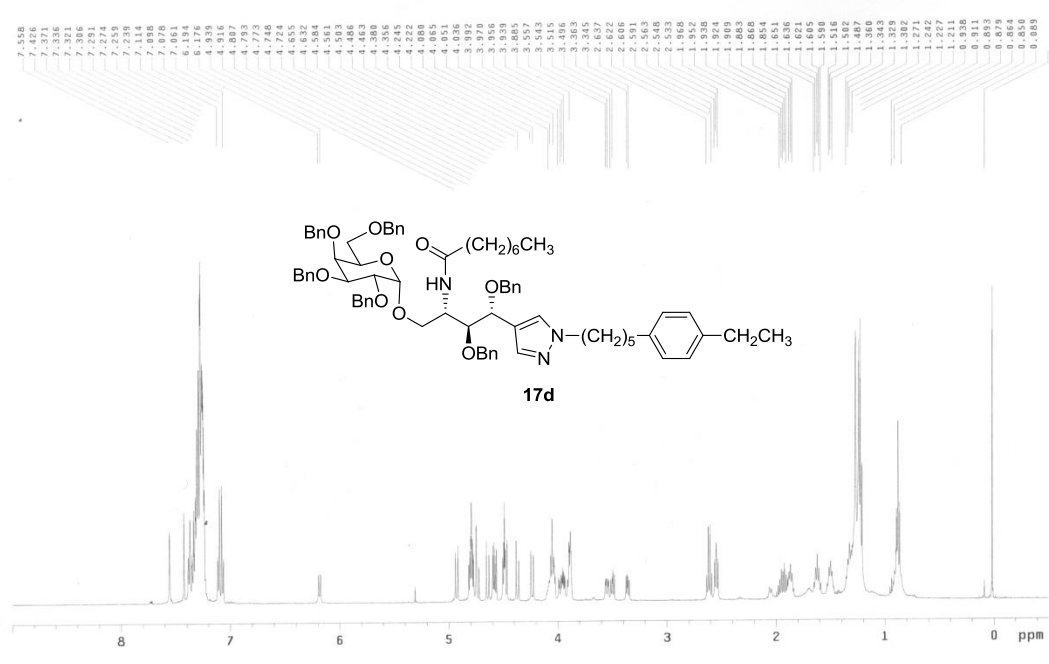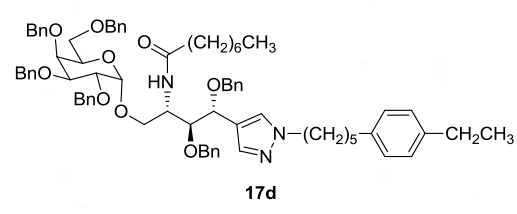

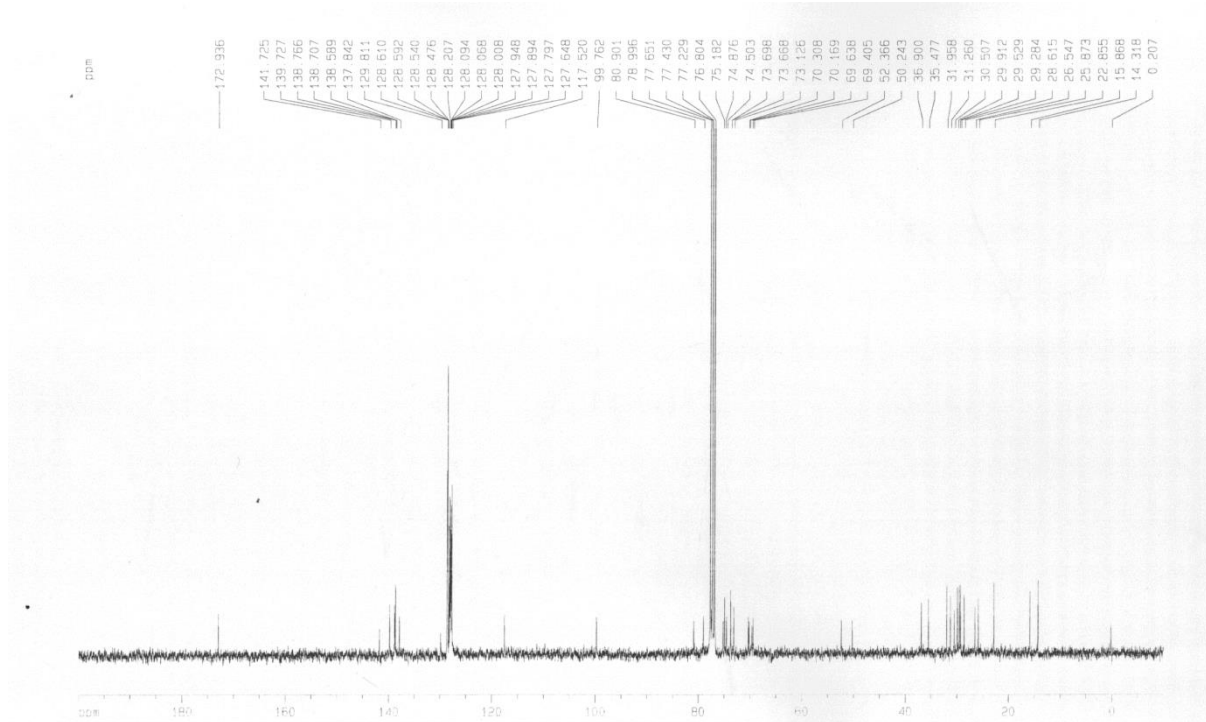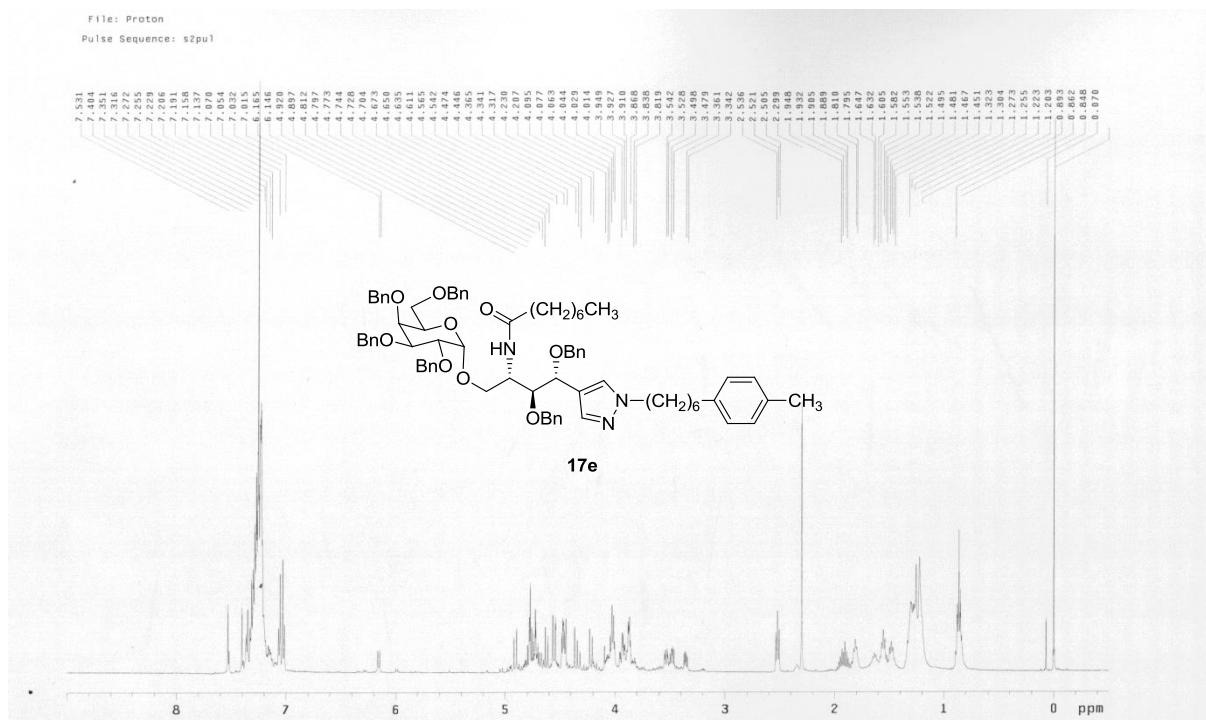



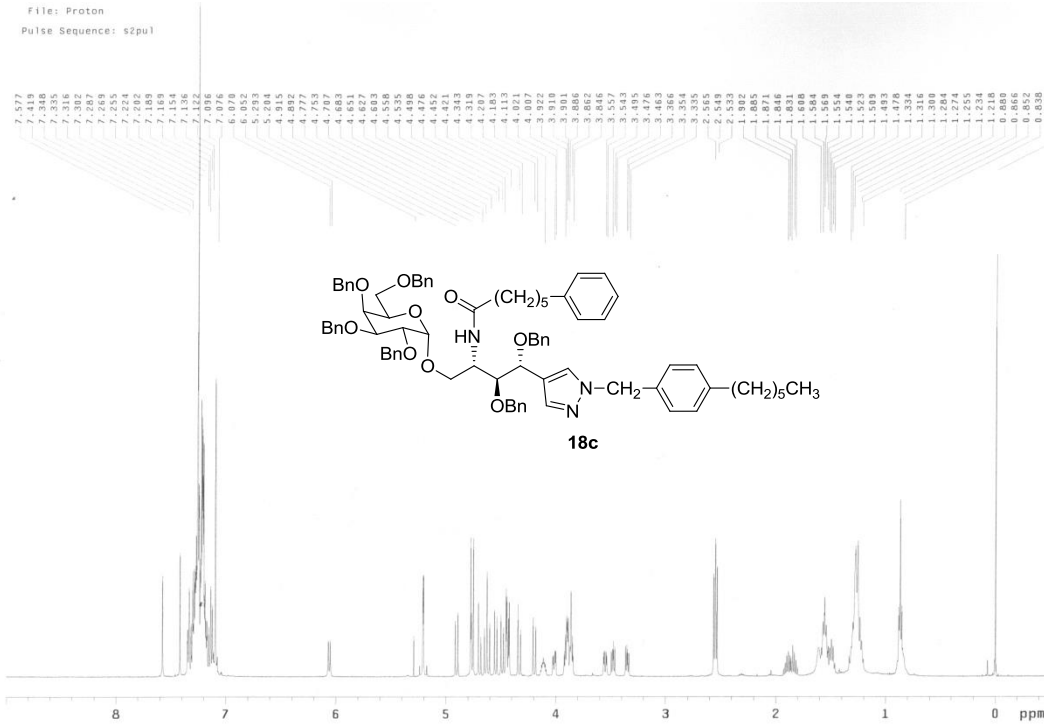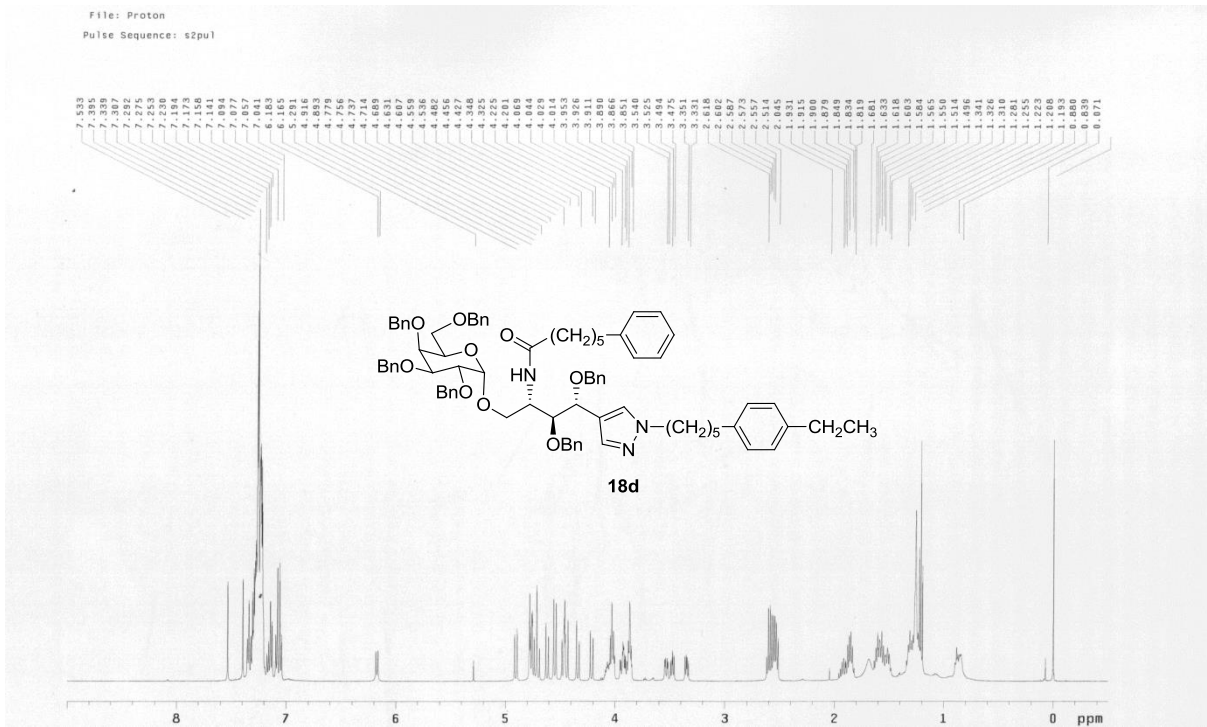



File: Proton  
Pulse Sequence: s2pu1

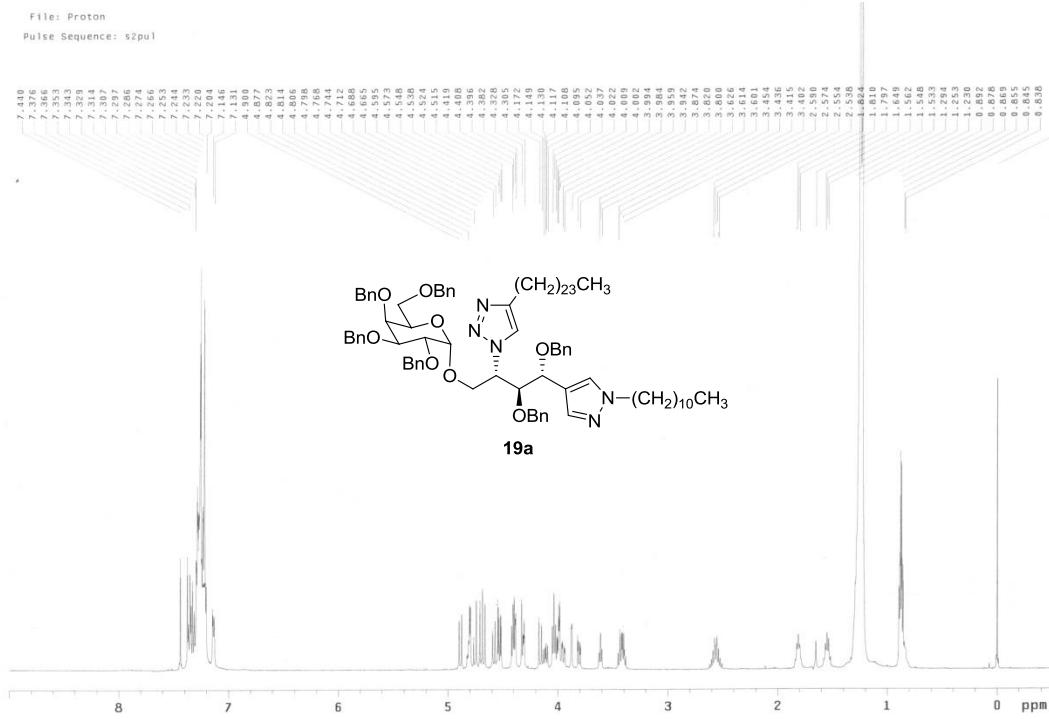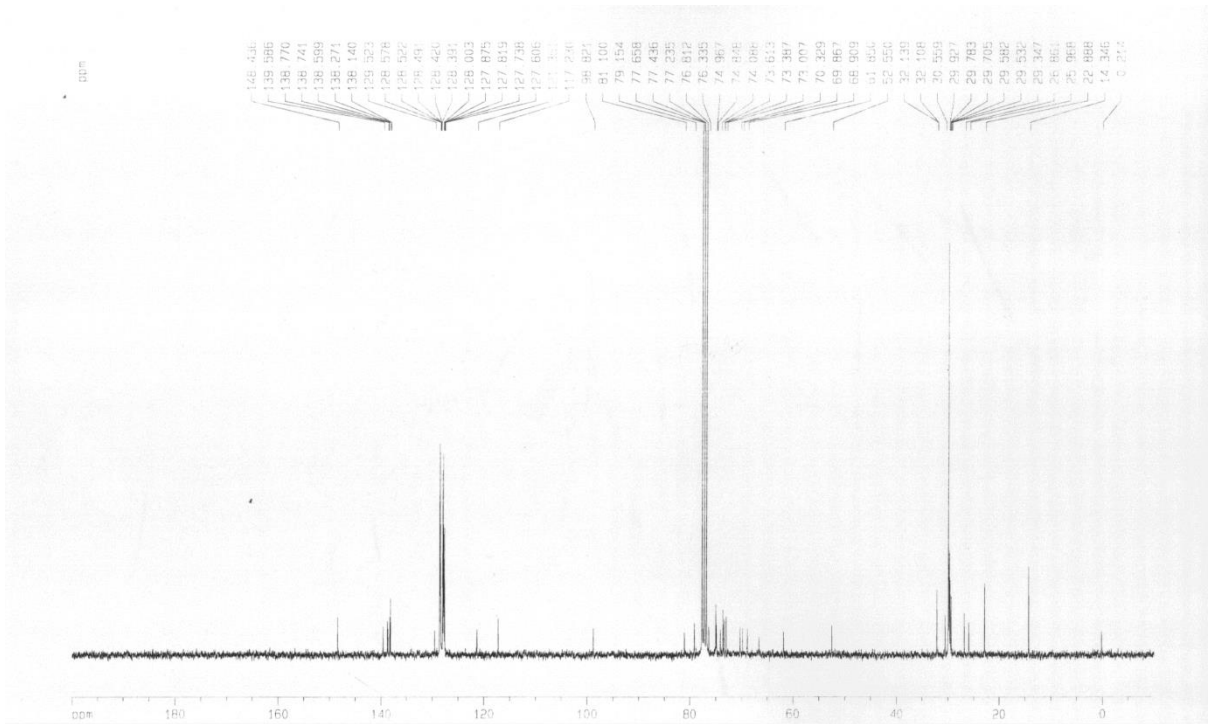

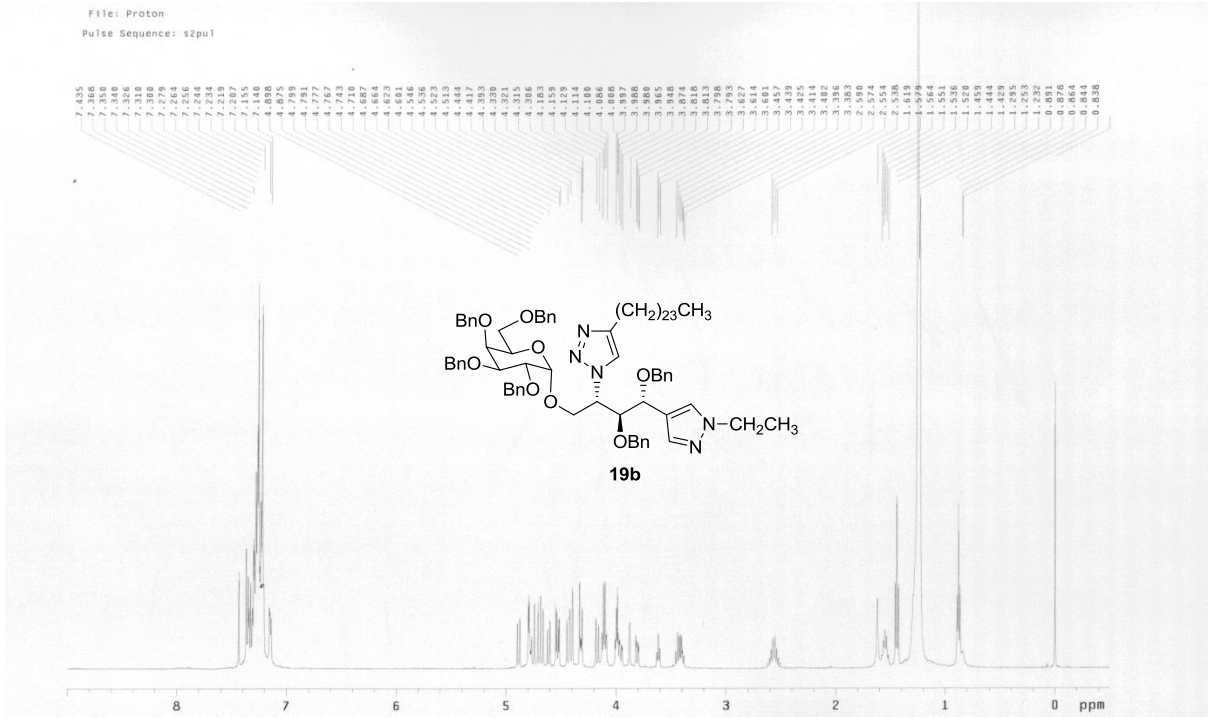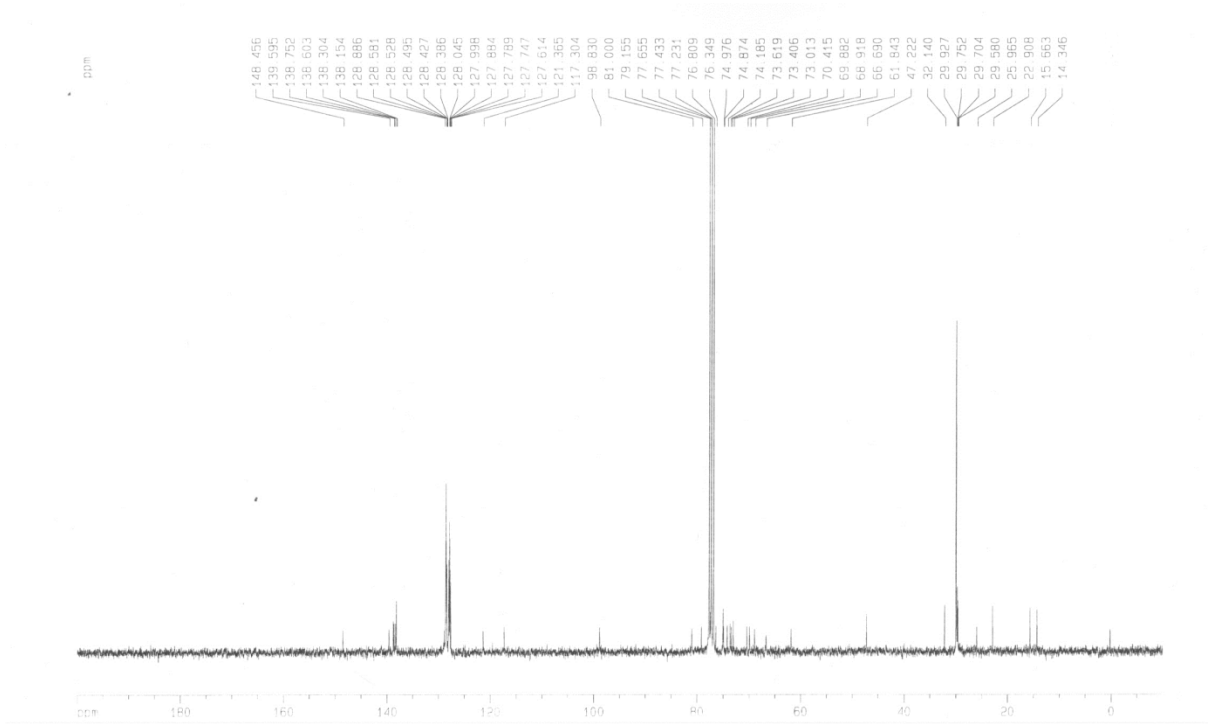

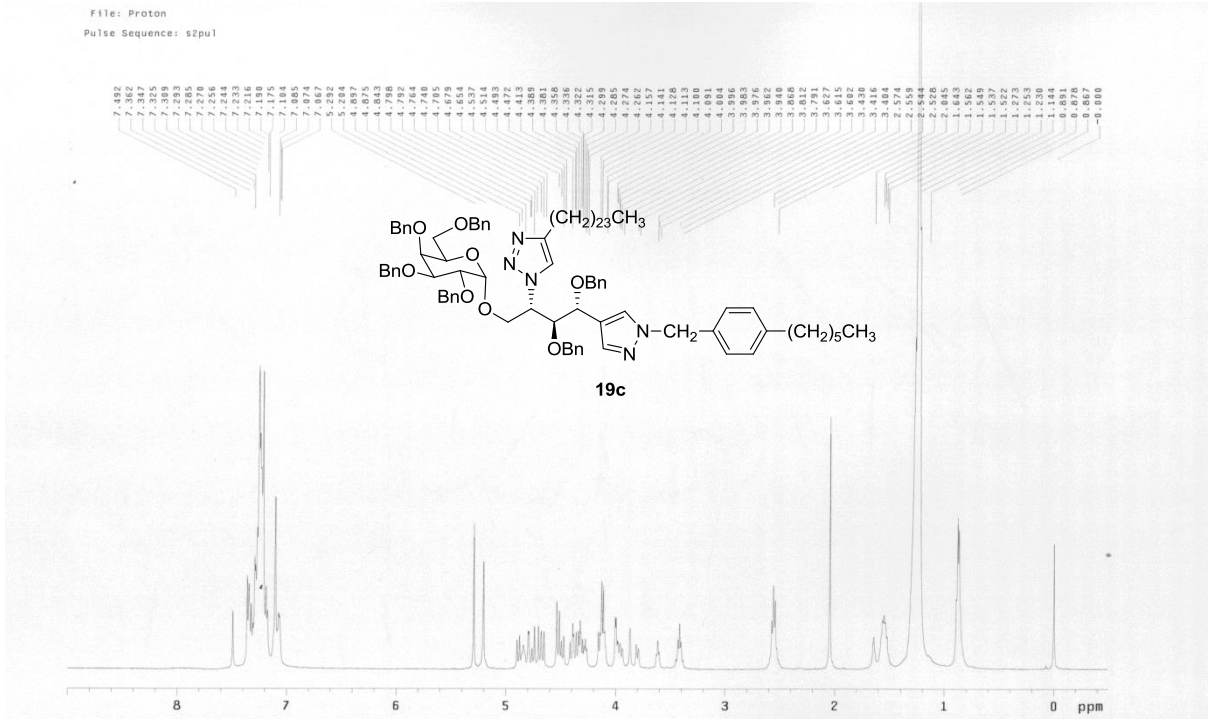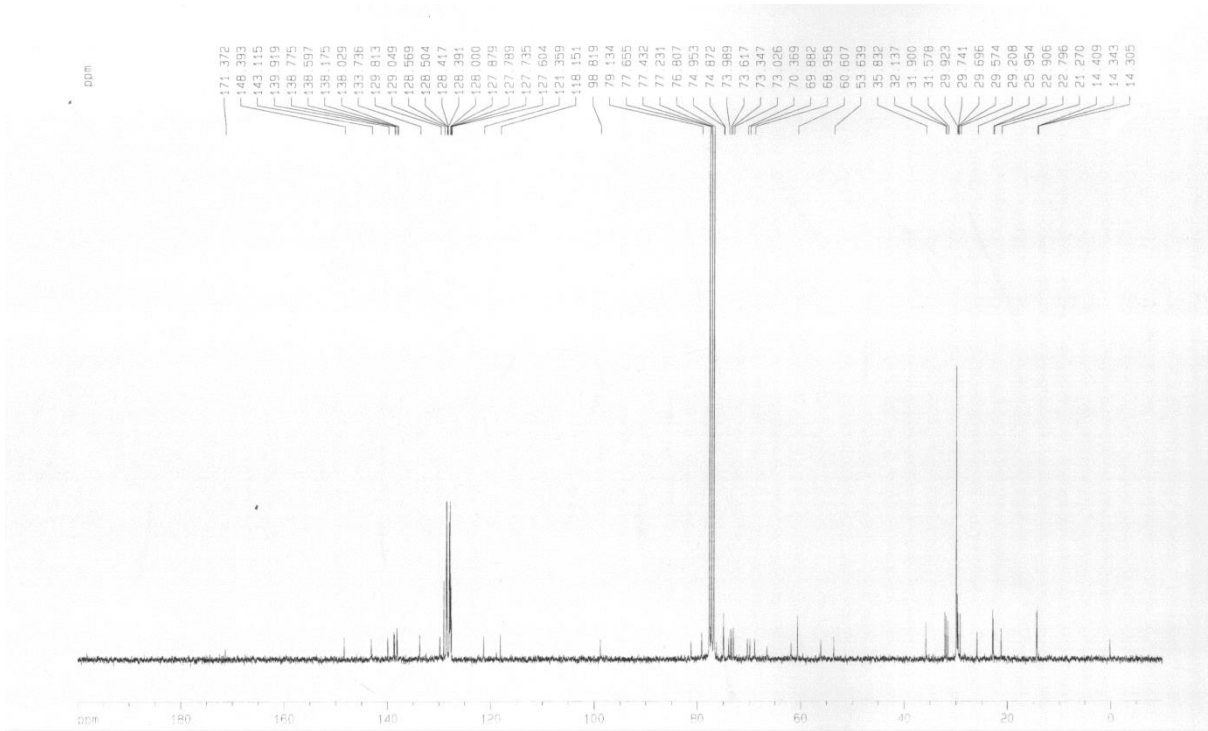



File: Proton  
Pulse Sequence: s2pul

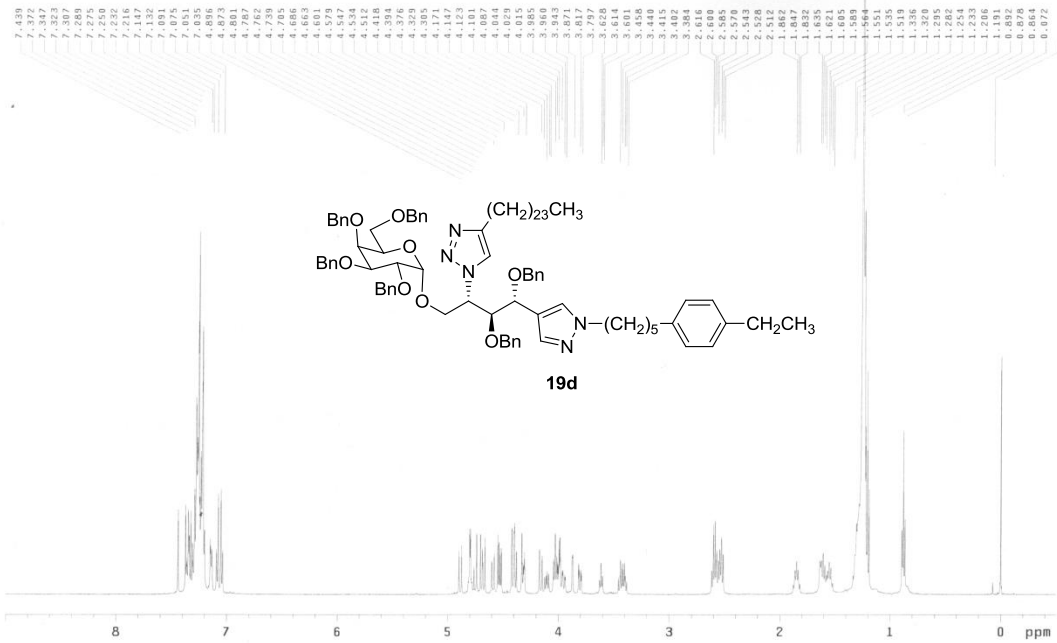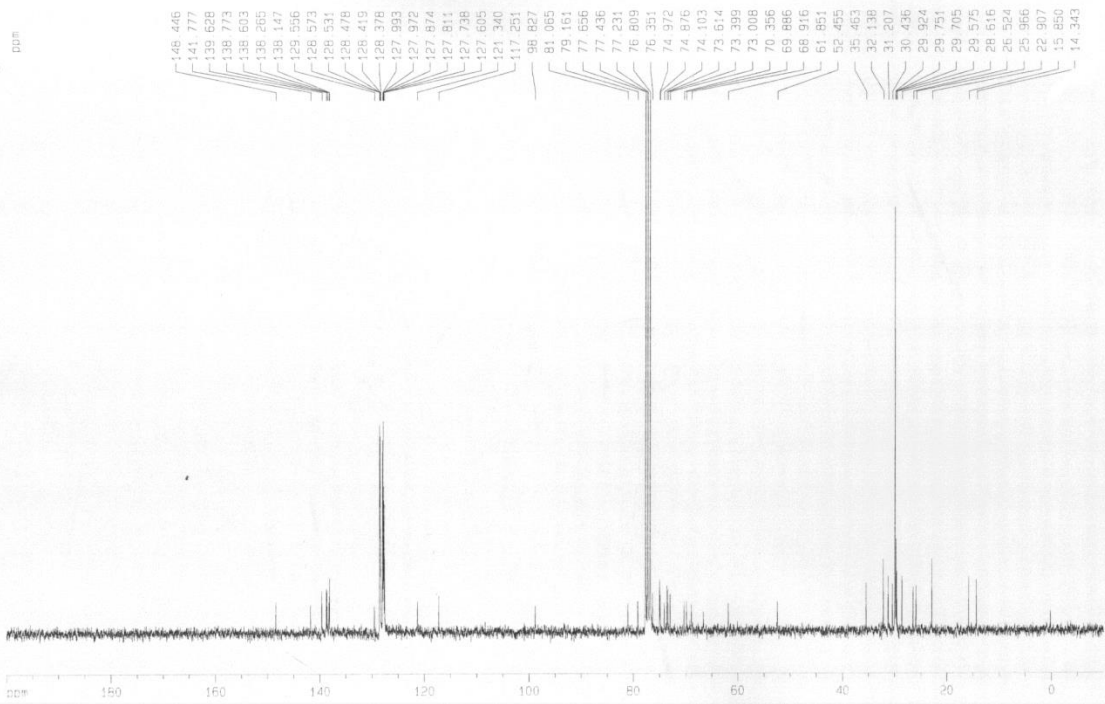

File: Proton  
Pulse Sequence: s2pu1

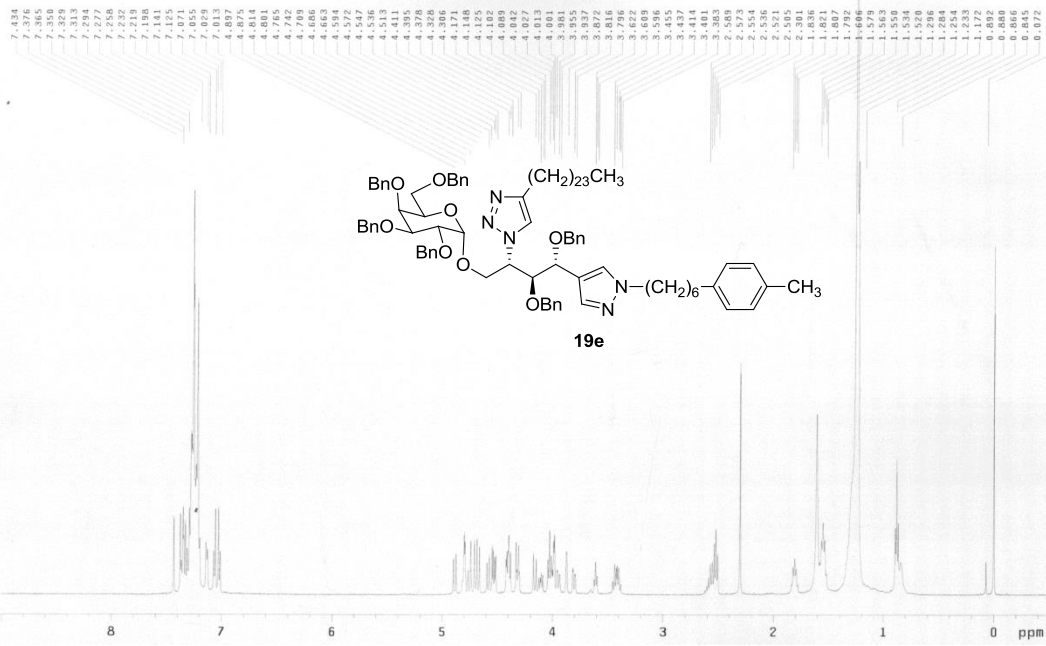

File: Proton  
Pulse Sequence: s2pu1

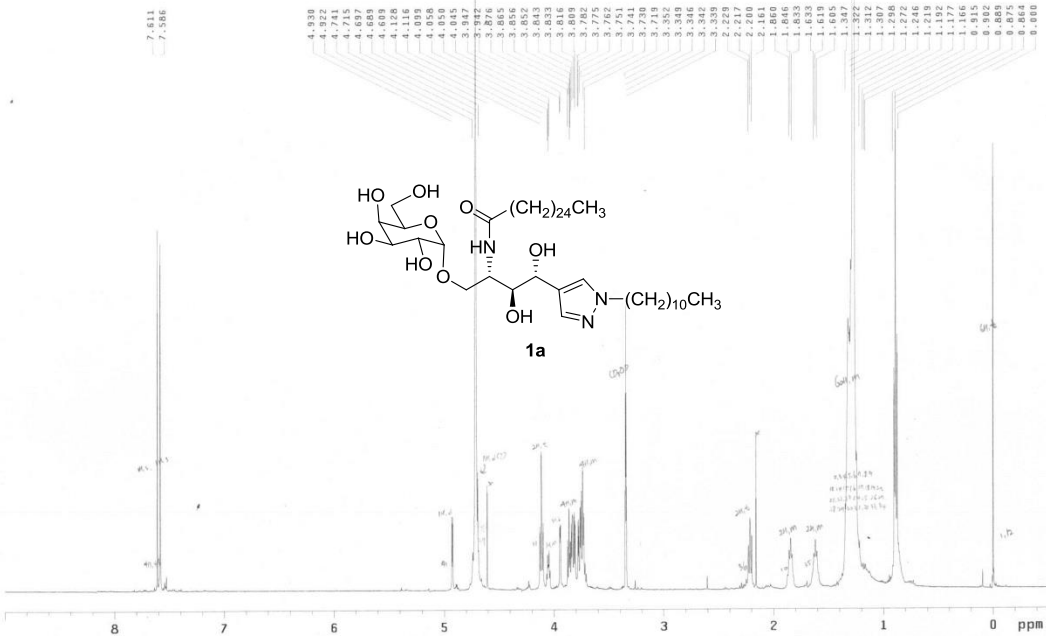

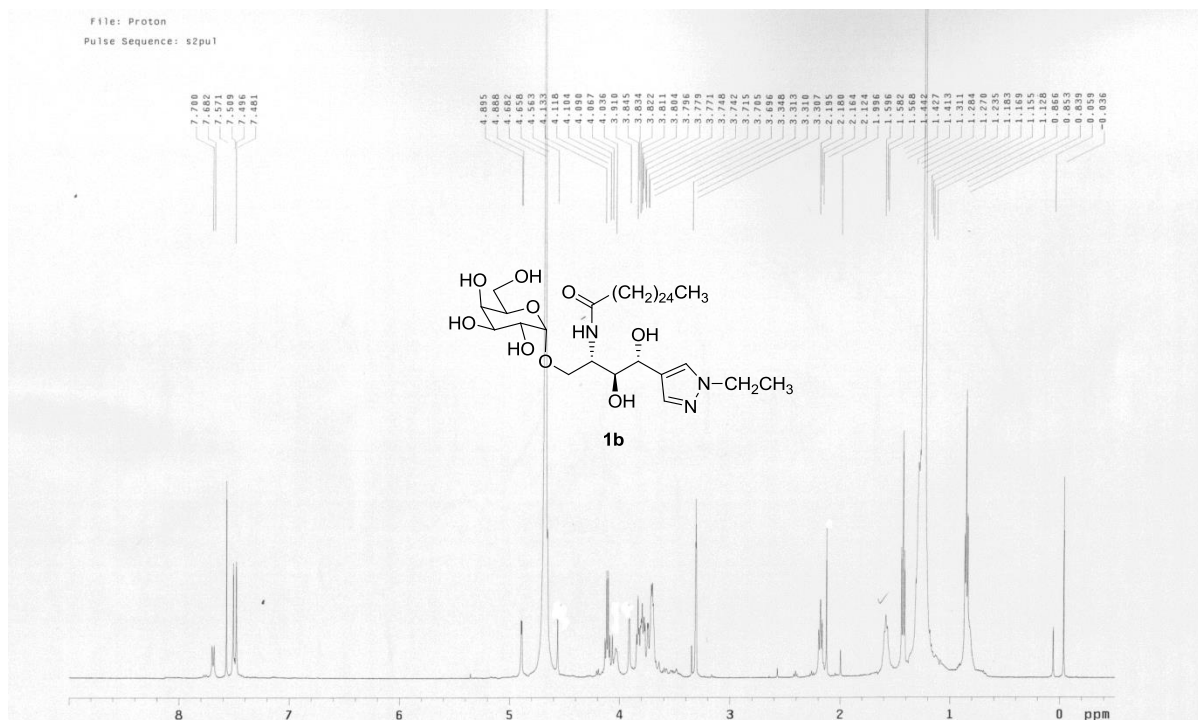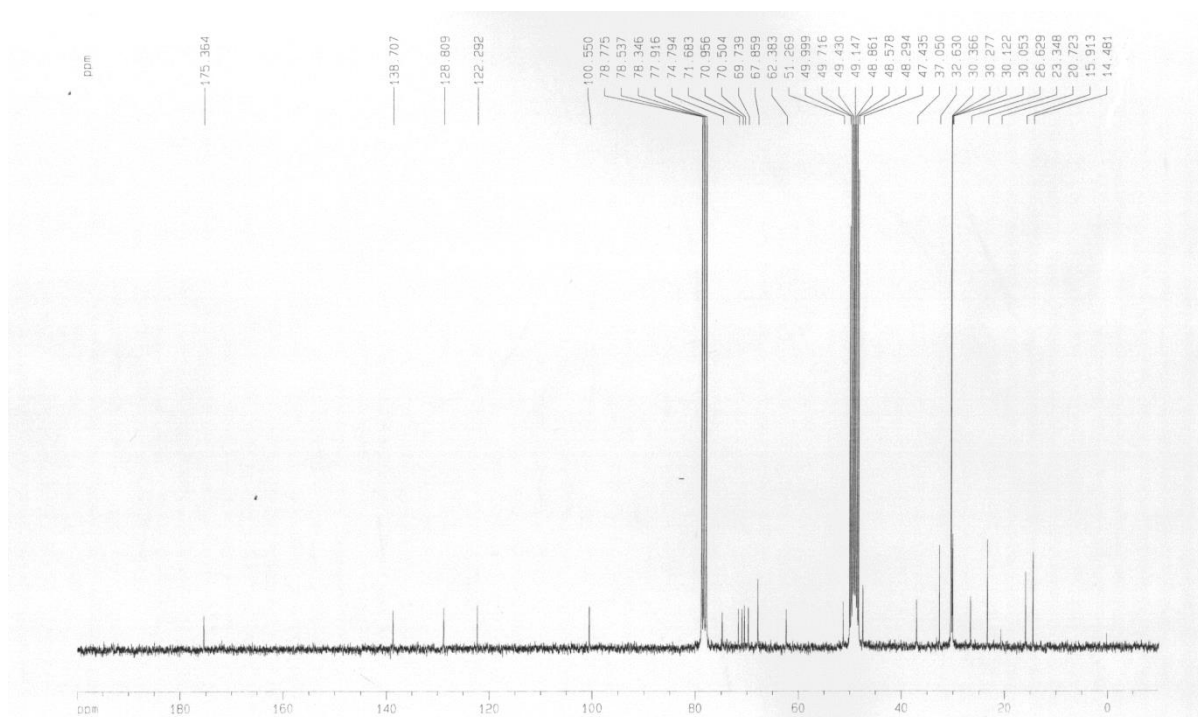

File: Proton  
Pulse Sequence: s2pu1

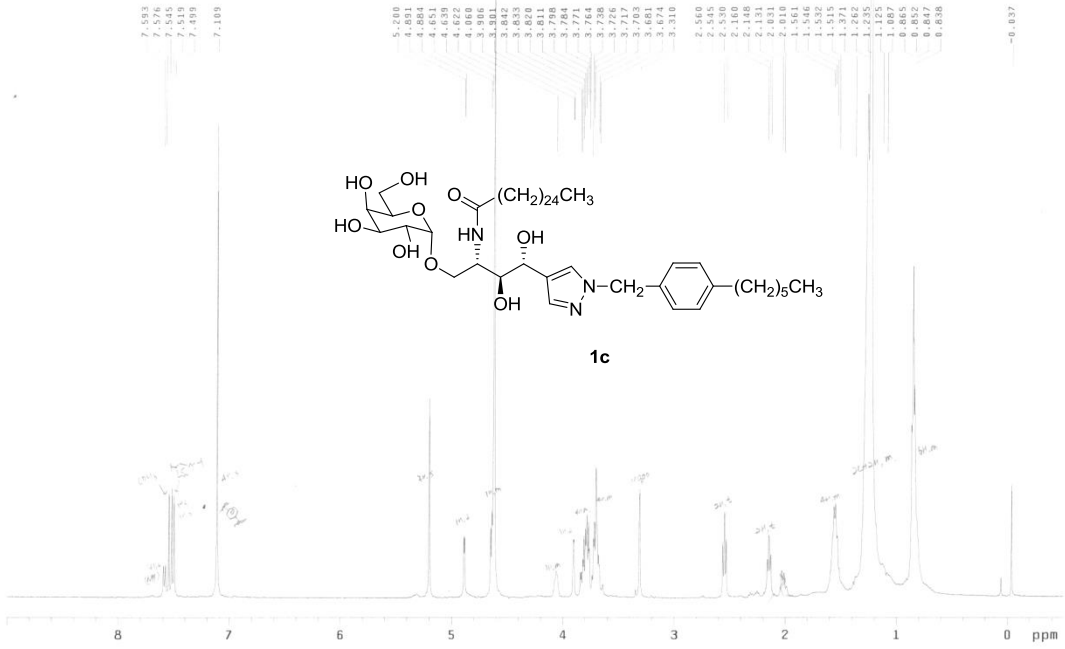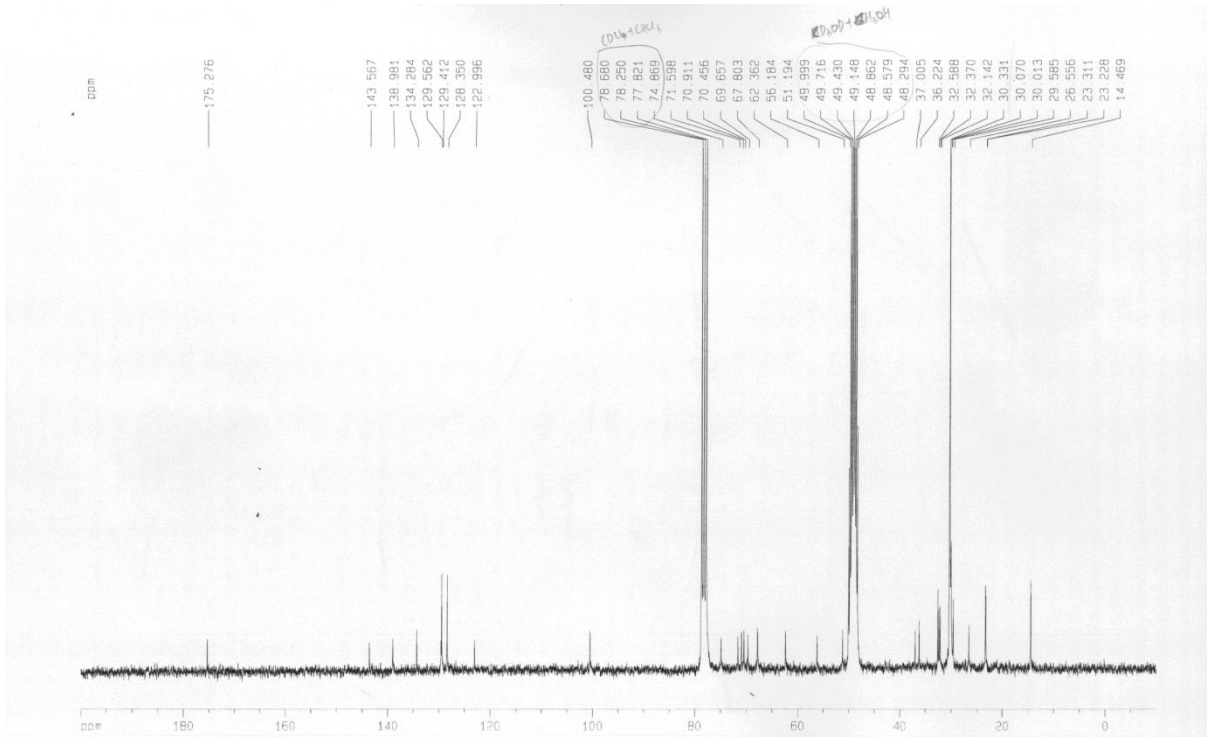

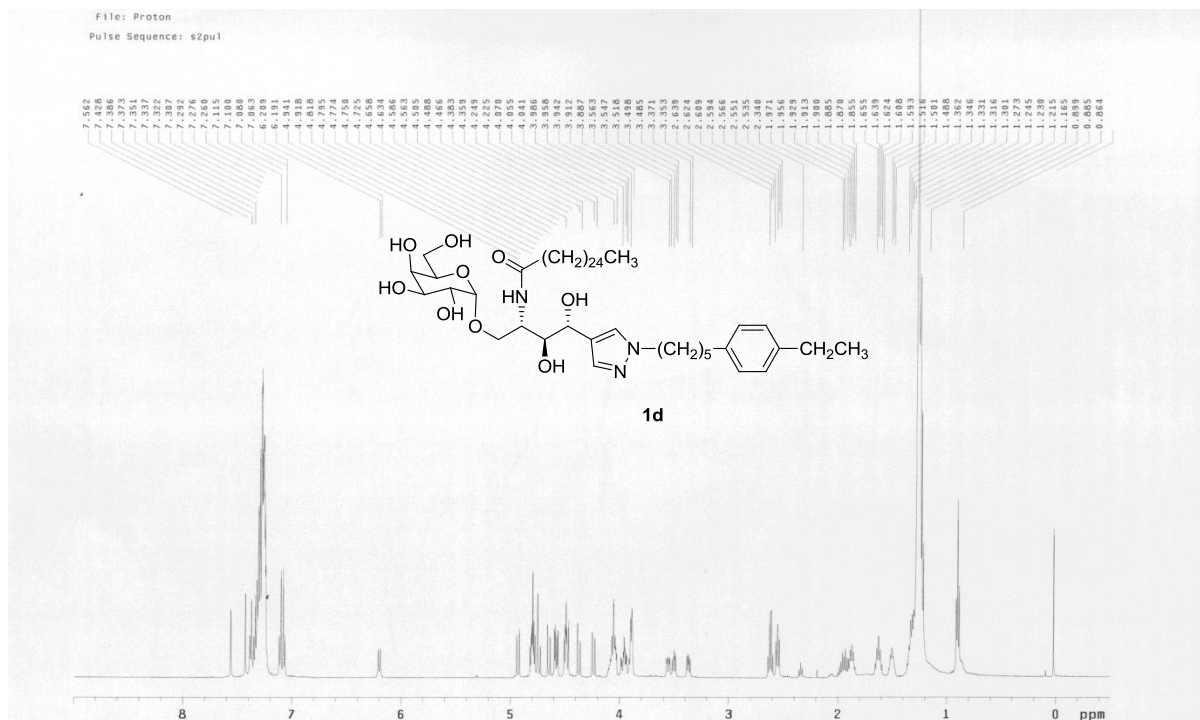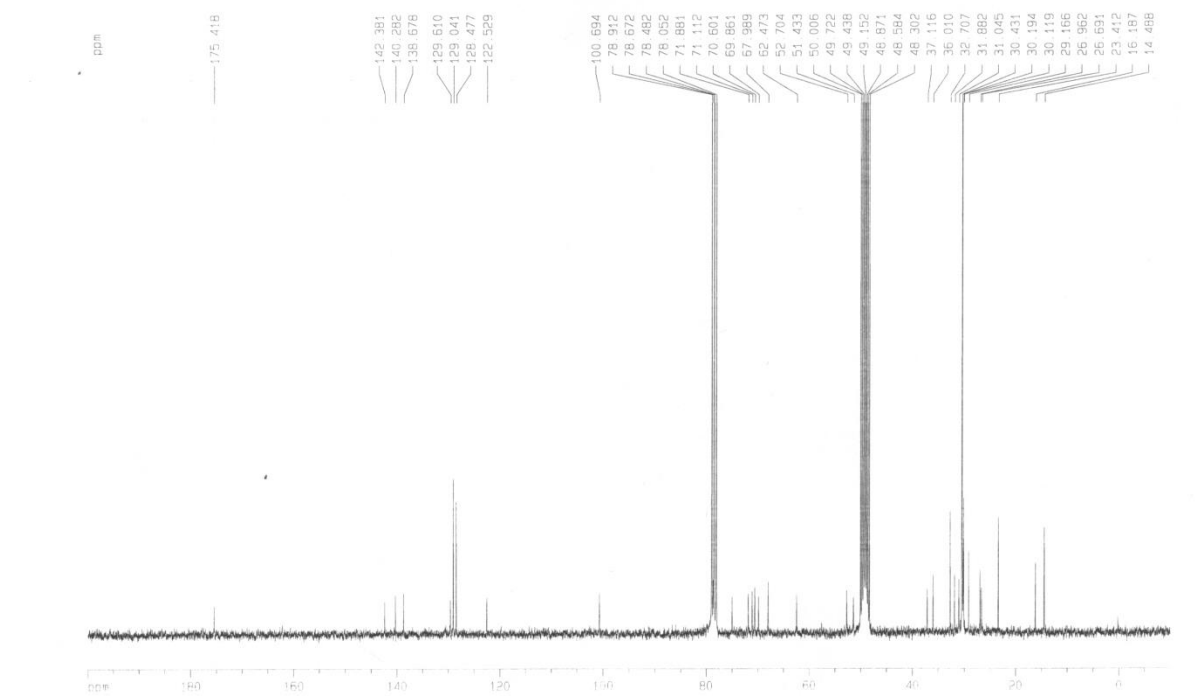

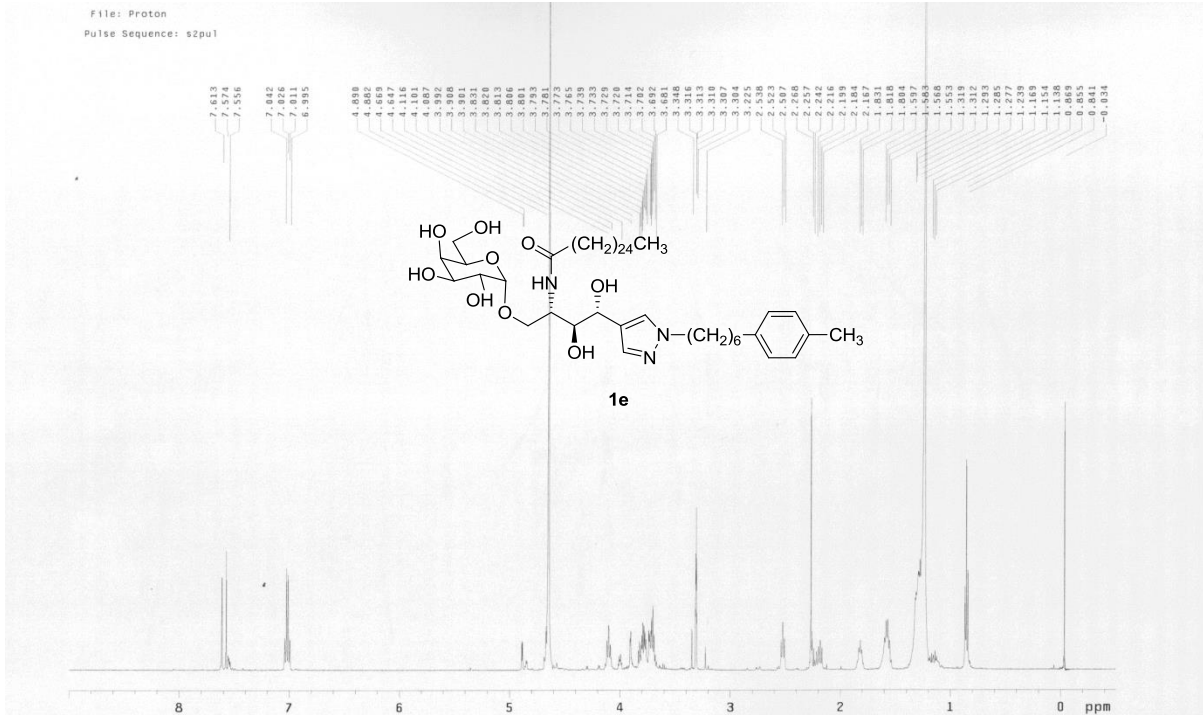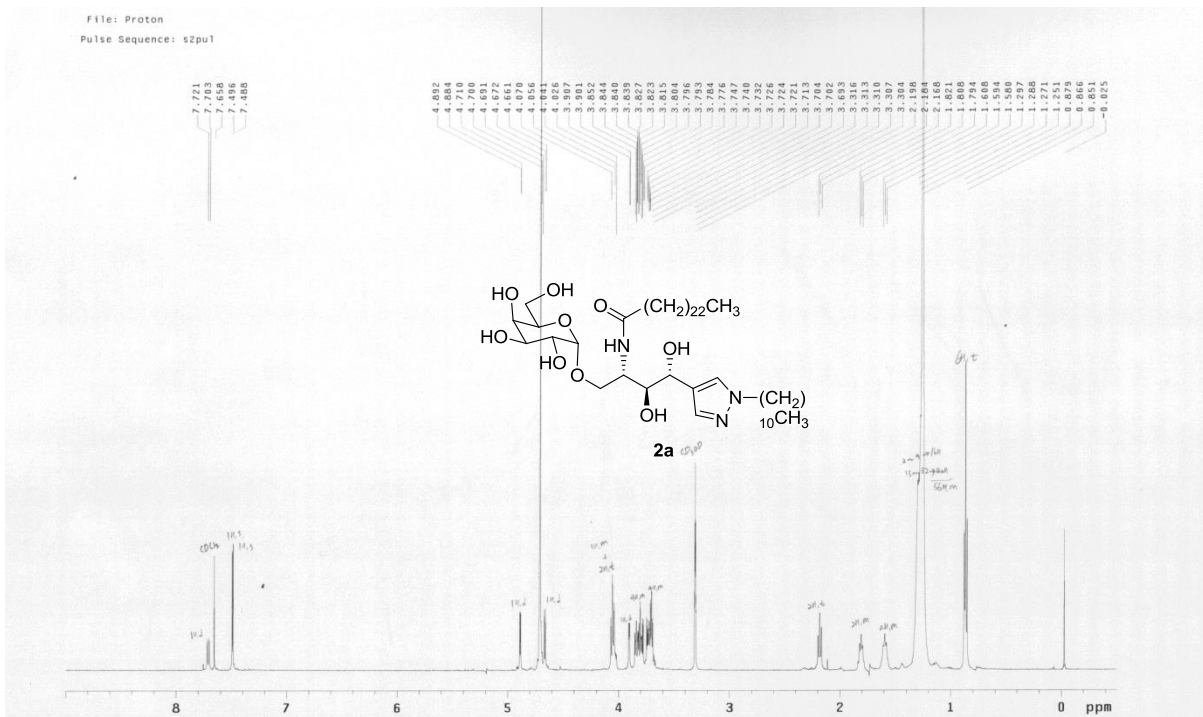







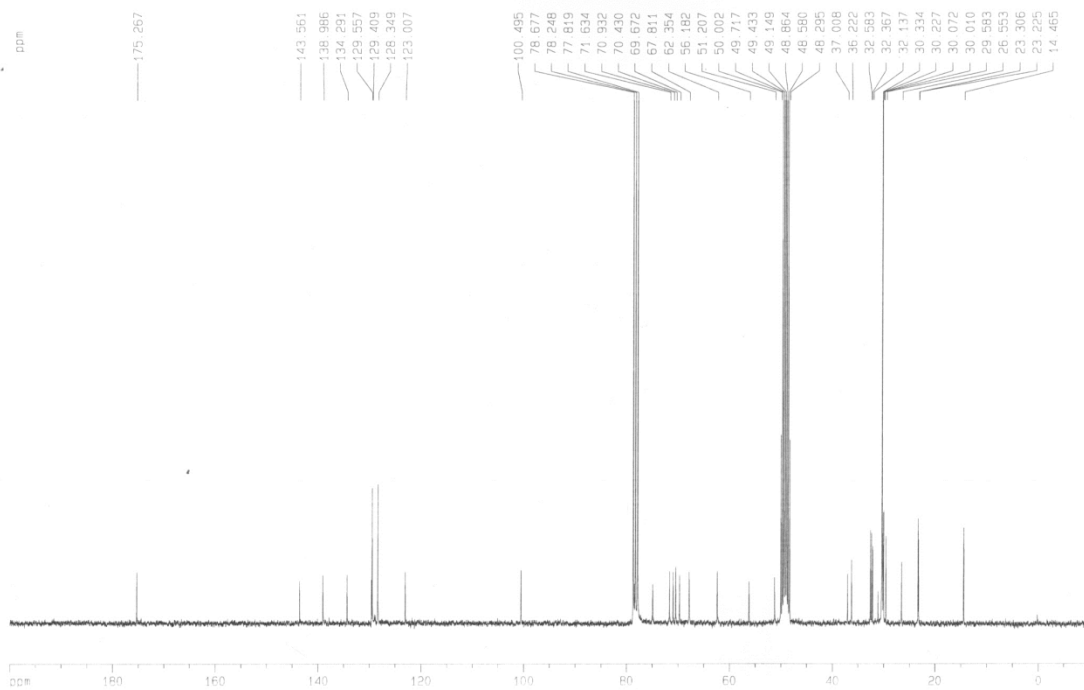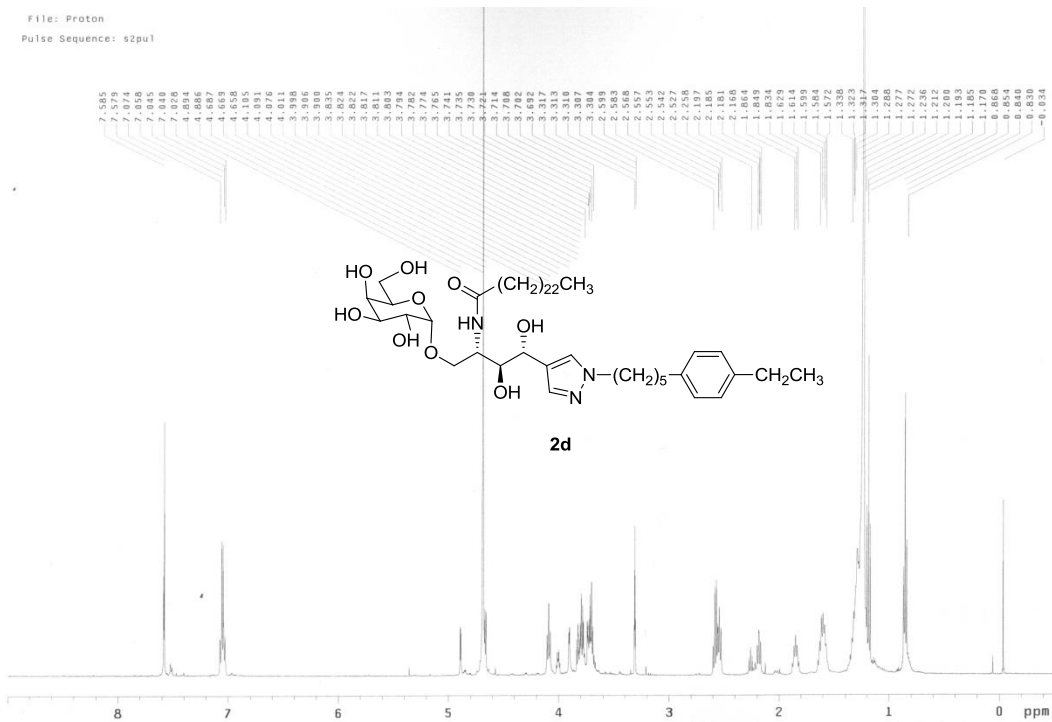

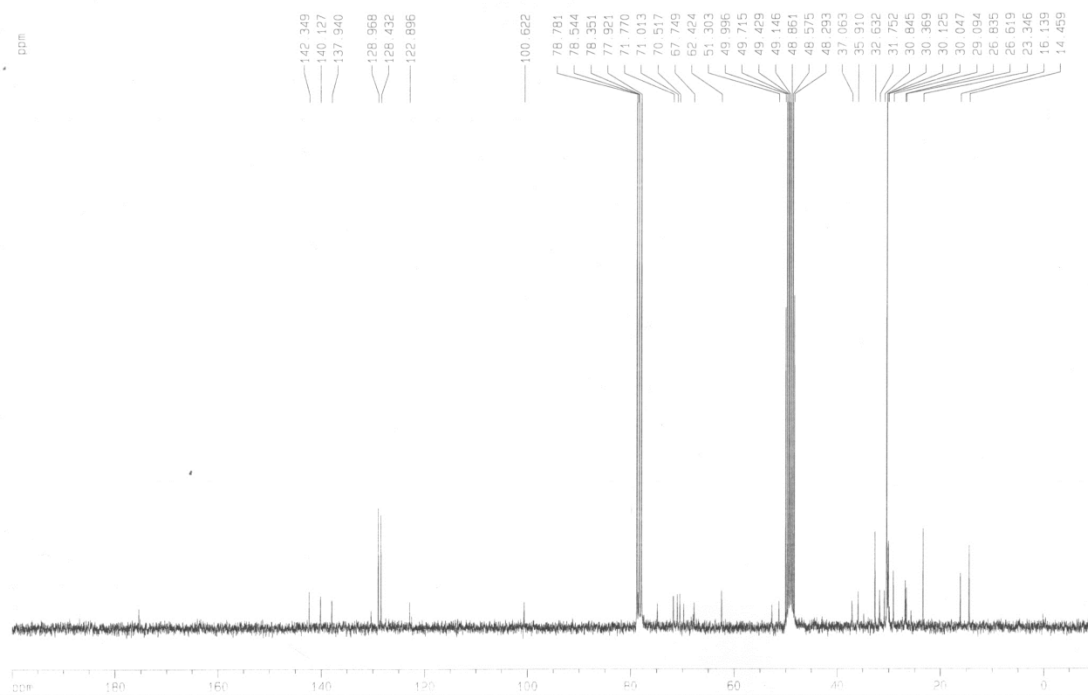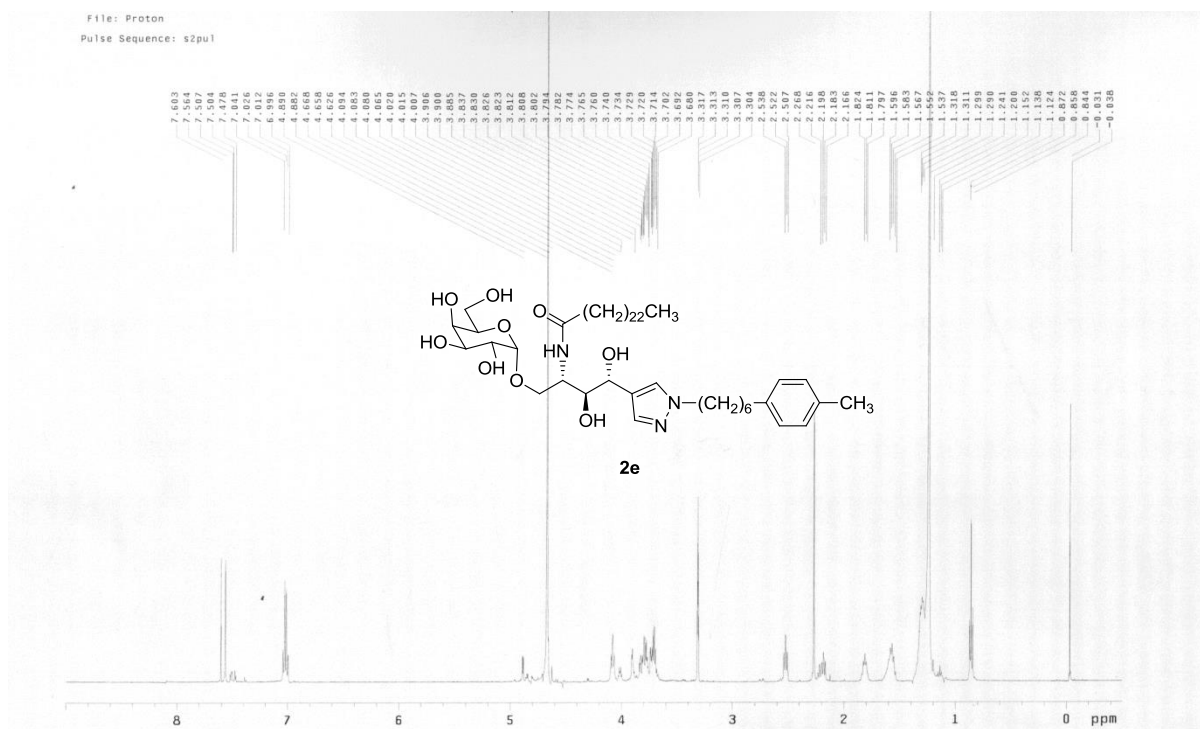

File: Praton  
Pulse Sequence: s2pu1

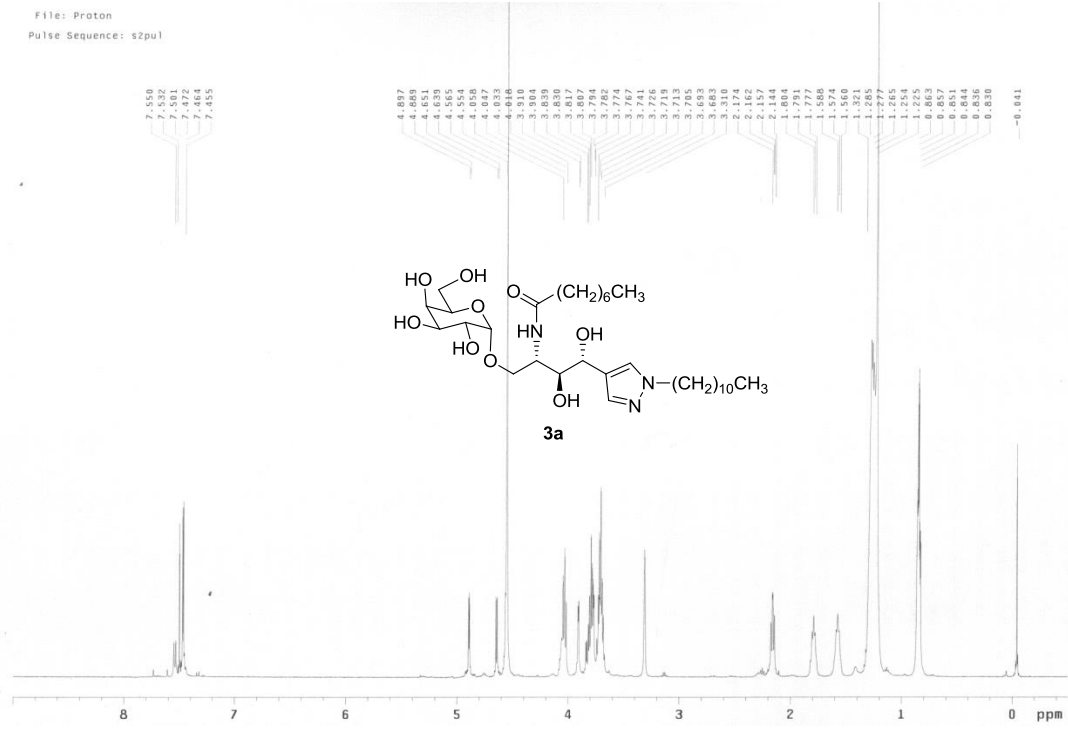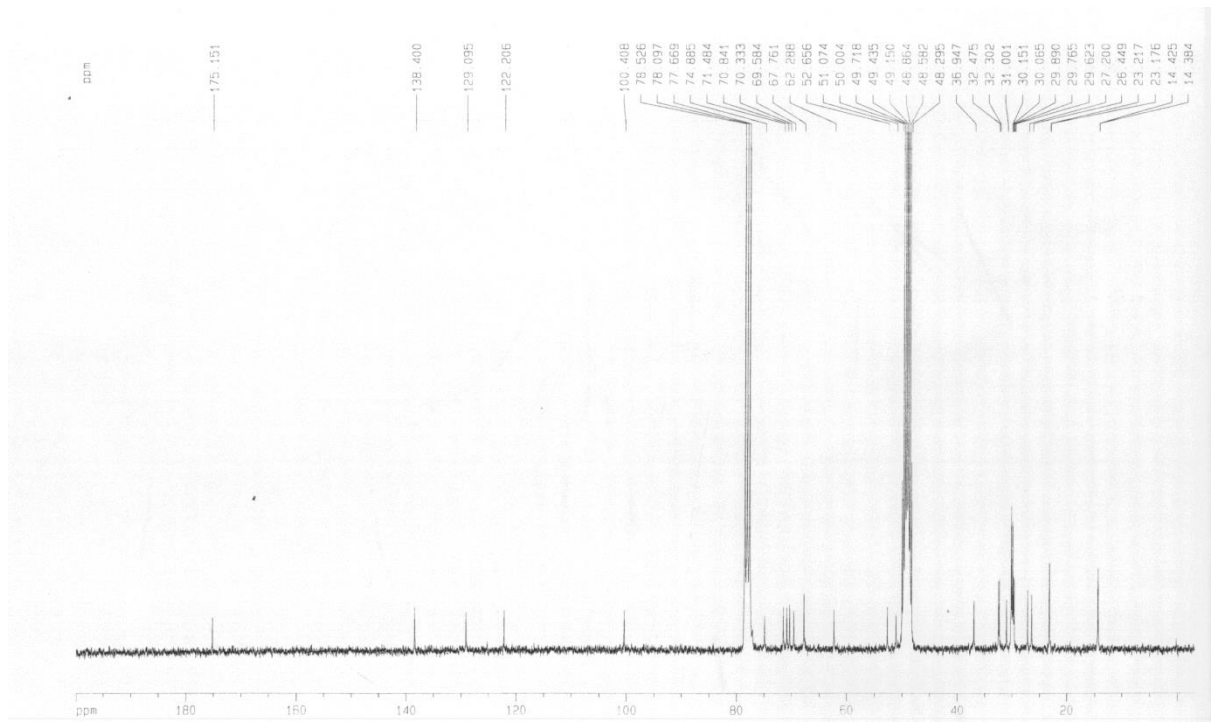



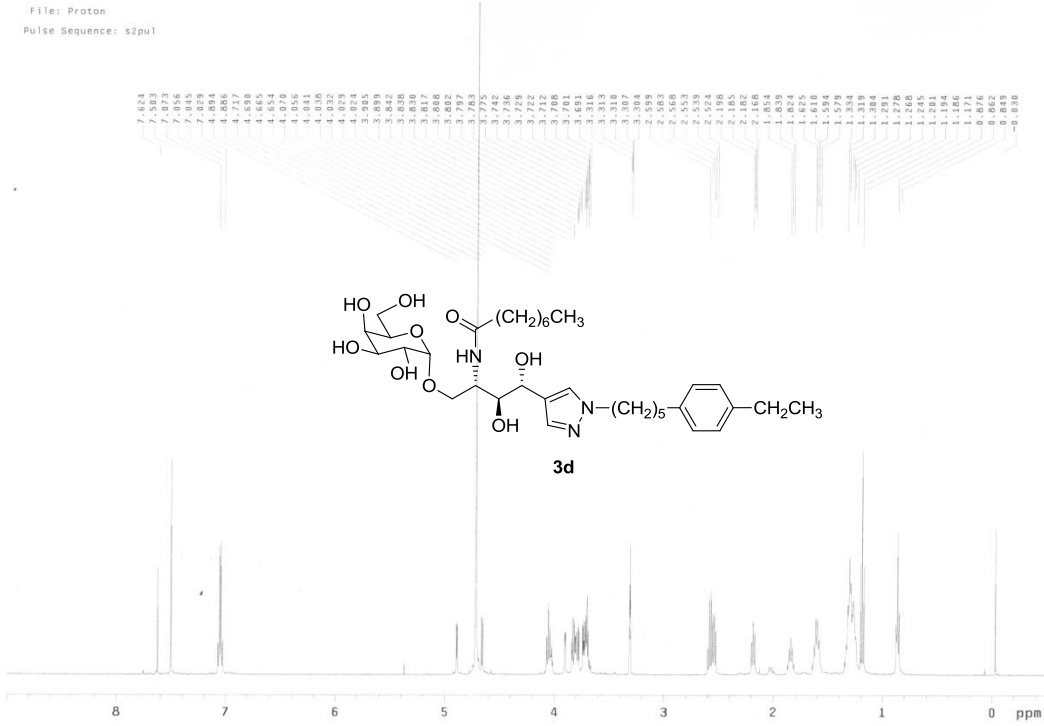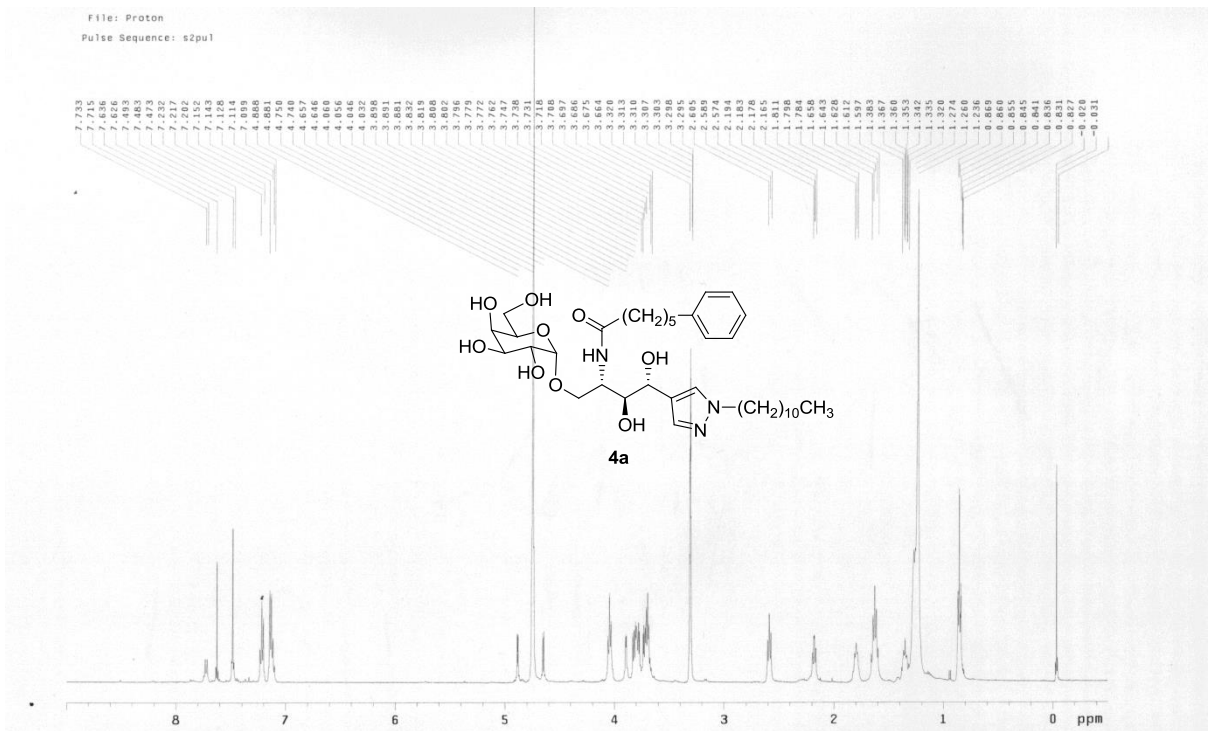

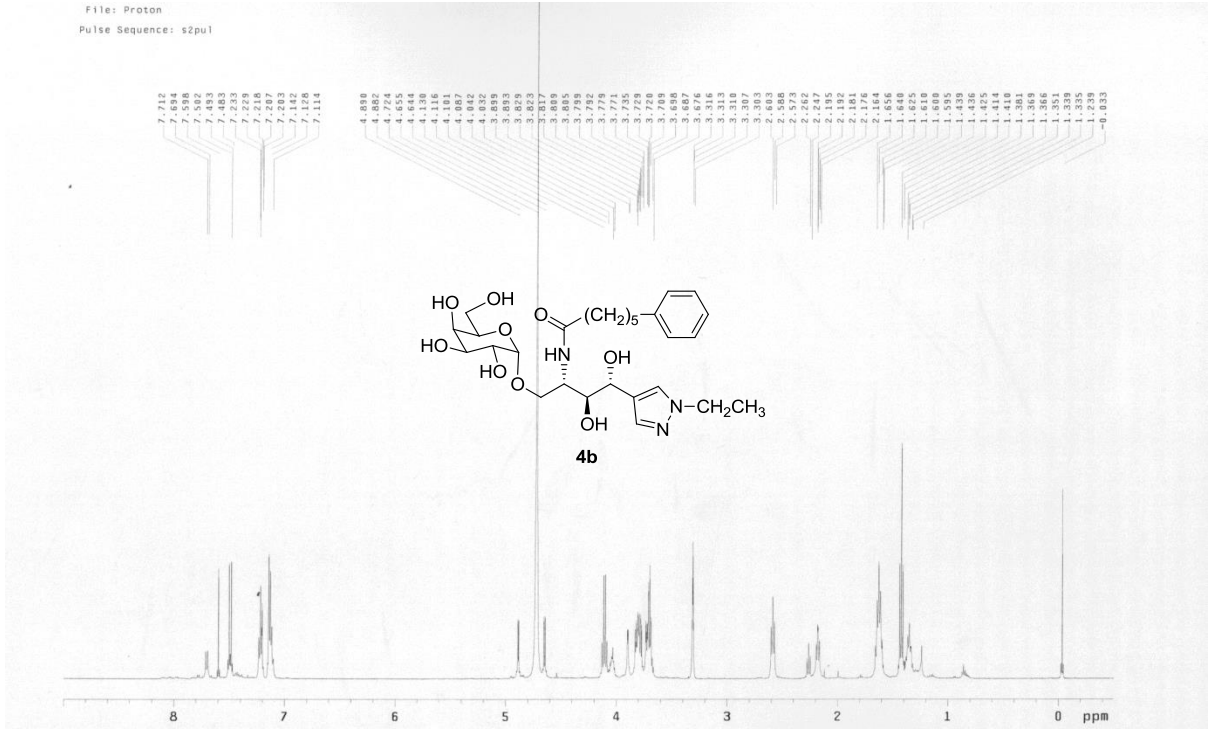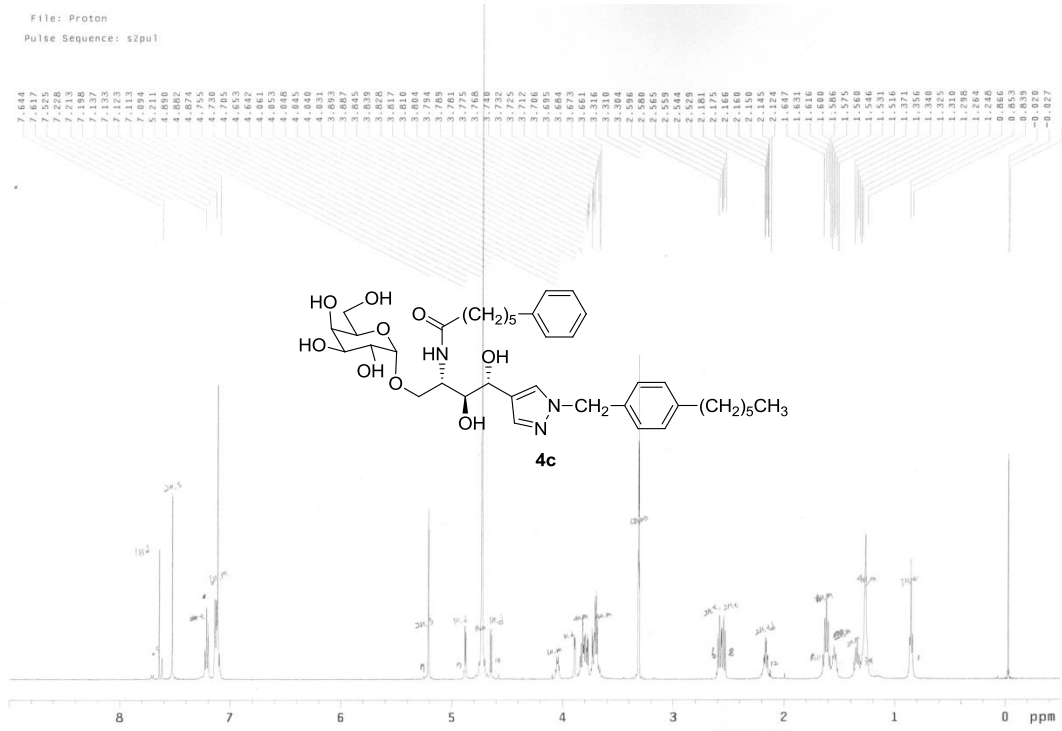



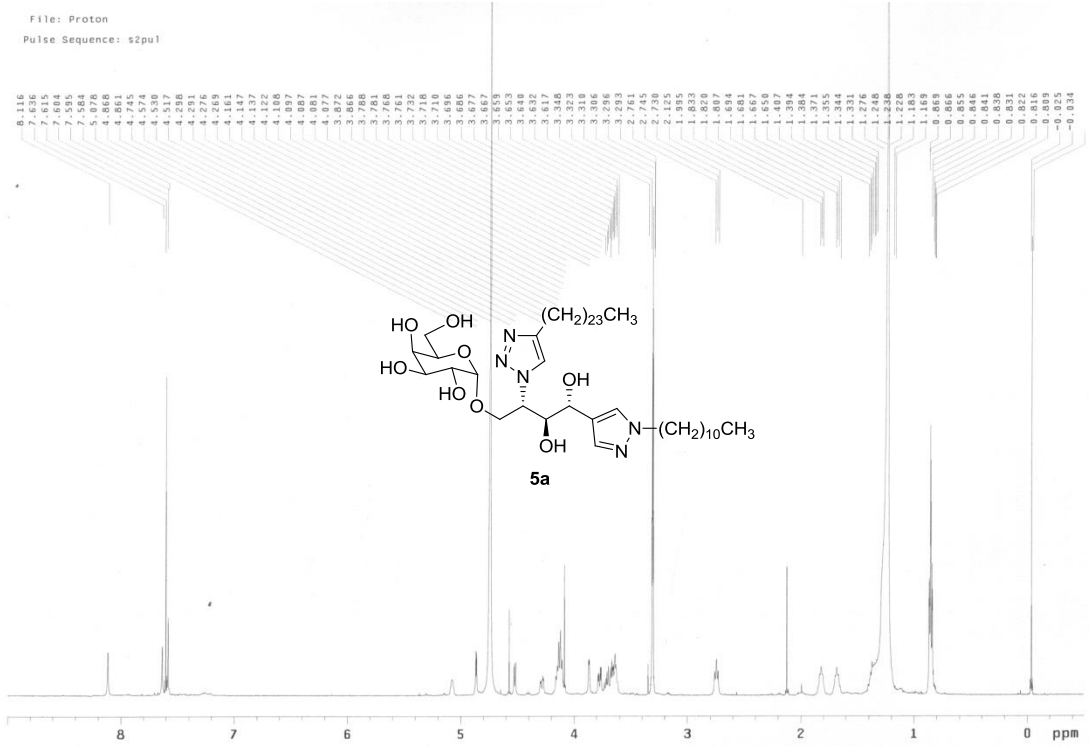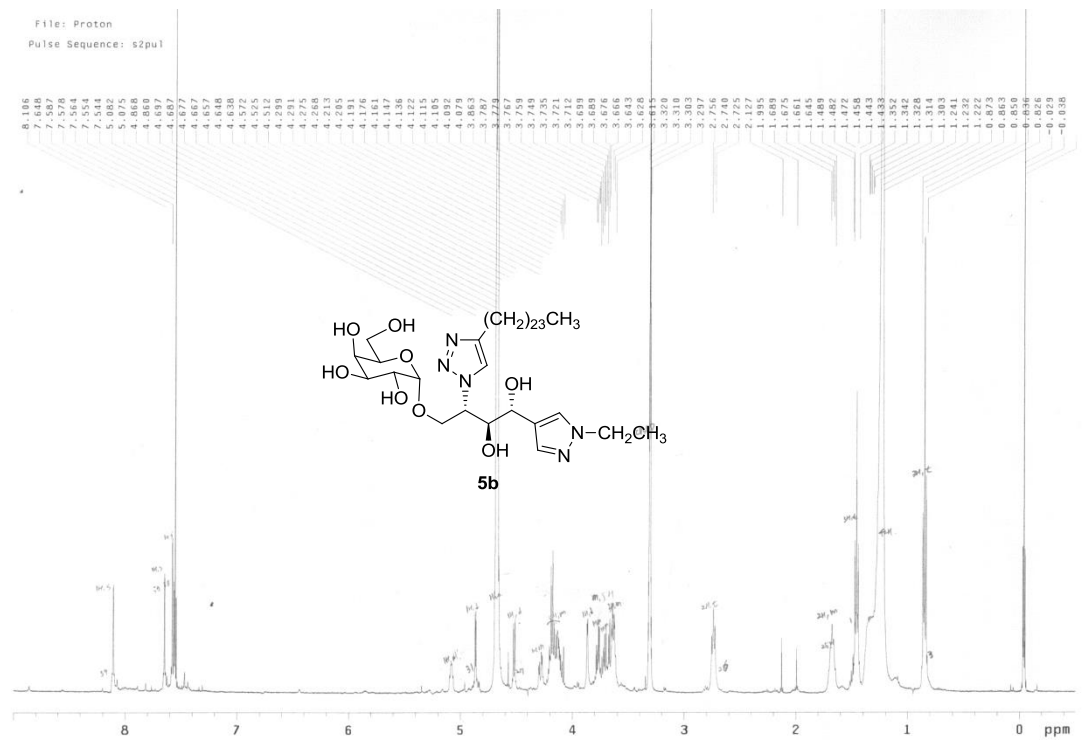



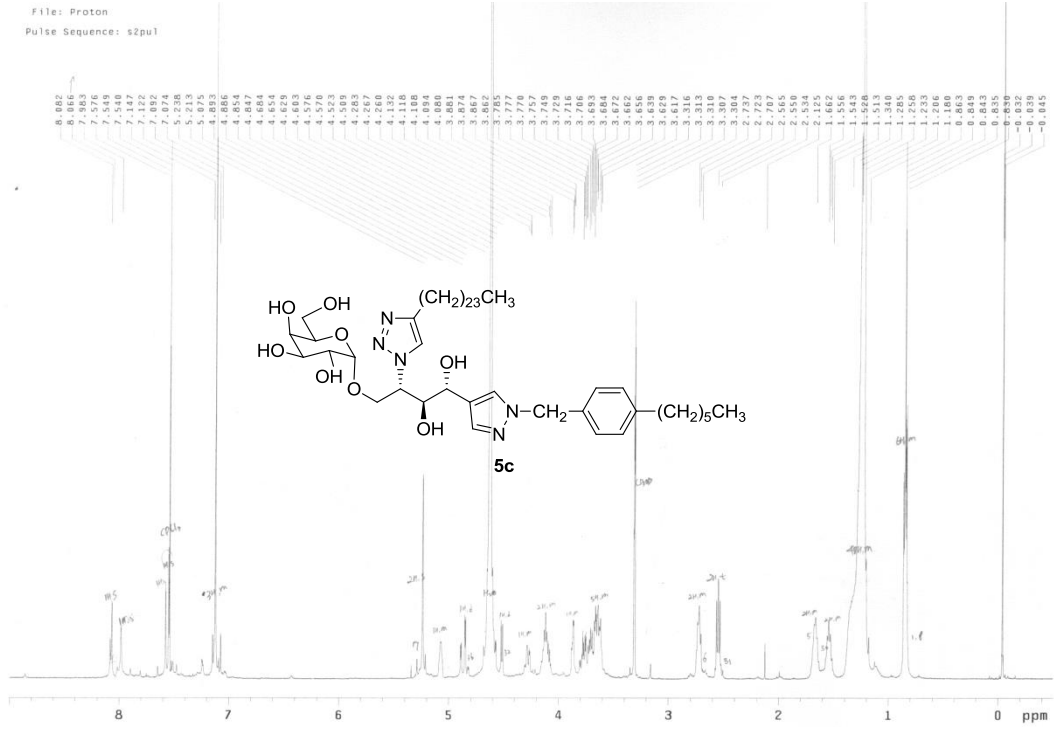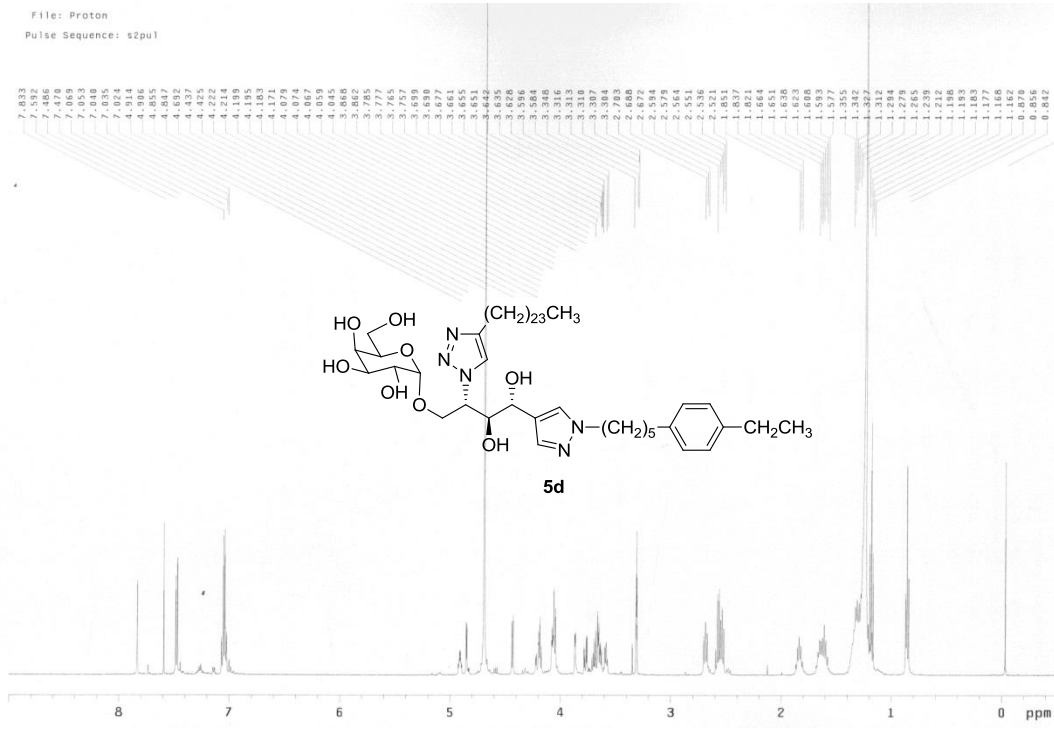

File: Proton  
Pulse Sequence: s2pul

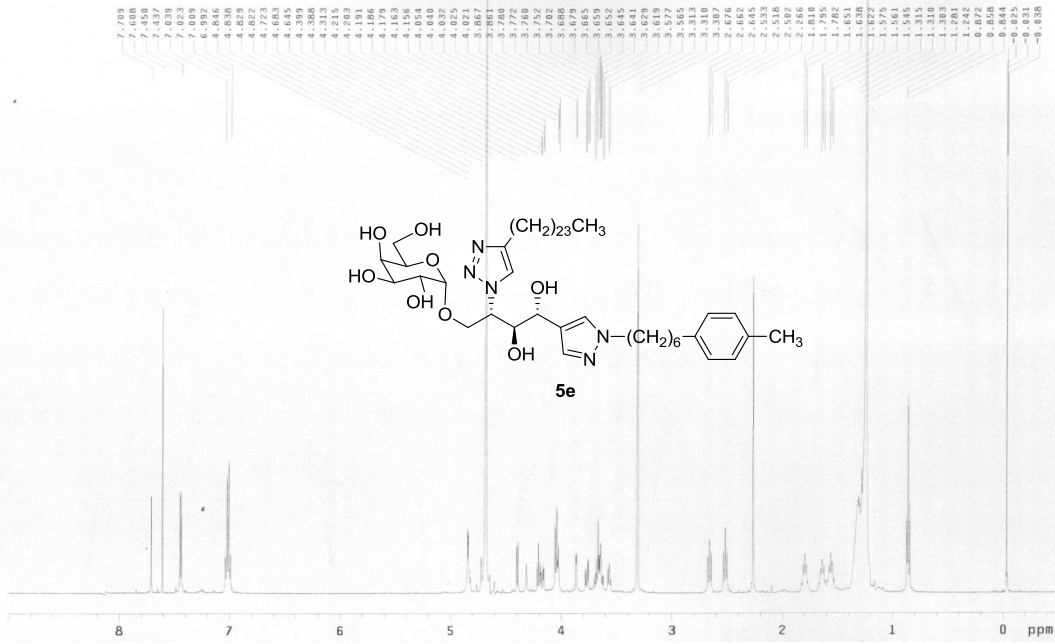

Supplement: pone.0087030.s001.pdf [file pone.0087030.s001.pdf]
